1 **Nodosome inhibition as a novel broad-spectrum antiviral strategy against arboviruses and**  
2 **SARS-CoV-2**

3 Daniel Limonta,<sup>a,b</sup> Lovely Dyna-Dagman,<sup>c</sup> William Branton,<sup>d</sup> Tadashi Makio,<sup>a</sup> Richard W.  
4 Wozniak,<sup>a, b</sup> Christopher Power,<sup>c,d,e</sup> Tom C. Hobman<sup>a,b,c,e</sup> #

5 <sup>a</sup> Department of Cell Biology, University of Alberta, Edmonton, Canada

6 <sup>b</sup> Li Ka Shing Institute of Virology, University of Alberta, Edmonton, Canada

7 <sup>c</sup> Department of Medical Microbiology & Immunology, University of Alberta, Edmonton,  
8 Canada

9 <sup>d</sup> Department of Medicine, University of Alberta, Edmonton, Canada

10 <sup>e</sup> Women & Children's Health Research Institute, University of Alberta, Edmonton, Canada

11

12 Running Head: Nodosome inhibition as novel antiviral strategy

13

14 Address correspondence to Tom C. Hobman, [tom.hobman@ualberta.ca](mailto:tom.hobman@ualberta.ca).

15

16

17

18

19

20 **ABSTRACT**

21 In the present report, we describe two small molecules with broad-spectrum antiviral activity.  
22 These drugs block formation of the nodosome. The studies were prompted by the observation that  
23 infection of human fetal brain cells with Zika virus (ZIKV) induces expression of nucleotide-  
24 binding oligomerization domain-containing protein 2 (NOD2), a host factor that was found to  
25 promote ZIKV replication and spread. A drug that targets NOD2 was shown to have potent broad-  
26 spectrum antiviral activity against other flaviviruses, alphaviruses and SARS-CoV-2, the causative  
27 agent of COVID-19. Another drug that inhibits the receptor-interacting serine/threonine-protein  
28 kinase 2 (RIPK2) which functions downstream of NOD2, also decreased replication of these  
29 pathogenic RNA viruses. The broad-spectrum action of nodosome targeting drugs is mediated, at  
30 least in part, by enhancement of the interferon response. Together, these results suggest that further  
31 preclinical investigation of nodosome inhibitors as potential broad-spectrum antivirals is  
32 warranted.

33

34 **KEYWORDS** antiviral, broad-spectrum, NOD2, RIPK2, arbovirus, SARS-CoV-2, COVID-19,  
35 nodosome, interferon

36

37

38

39

40

## 41 INTRODUCTION

42 Re-emerging and emerging RNA viruses represent a major threat to global public health. Vaccines  
43 and antiviral drugs which usually target a single virus species, are critical measures to prevent and  
44 control the spread of these pathogens. However, prophylactic or therapeutic drugs are not available  
45 for many of the most important RNA viruses in circulation today (1). While highly effective direct-  
46 acting antiviral drugs have been developed for a number of important human pathogens such as  
47 HIV-1, herpesvirus family members and hepatitis C virus (2), these drugs tend to be highly specific  
48 and are of limited use for treating other viral infections. In contrast, broad-spectrum antivirals  
49 would be expected to inhibit replication of multiple viruses, including emerging and re-emerging  
50 RNA viruses. Although several broad-spectrum antiviral compounds are in preclinical studies or  
51 in clinical trials, to date, no drug in this class has been licensed (3). Because hundreds of cellular  
52 factors are required for productive viral infection, targeting common host factors that are utilized  
53 by multiple viruses, may be a viable approach for developing broad-spectrum antivirals (4).

54 Herein we report the identification and characterization of a novel class of small molecules with  
55 broad-spectrum antiviral activity. These drugs selectively block the intracellular pattern  
56 recognition receptor NOD2 (nucleotide-binding oligomerization domain-containing protein 2),  
57 and a critical mediator of NOD2 signalling, RIPK2 (receptor-interacting serine/threonine-protein  
58 kinase 2). NOD2 recognizes the peptidoglycan muramyl dipeptide (MDP) that is found in bacterial  
59 cell walls, but it can also bind to viral RNA. In doing so, NOD2 induces formation of the nodosome  
60 and stimulates host defense against infections (5). Although NOD2 is important for the innate  
61 immune response against HIV-1 (6), cytomegalovirus (7) and syncytial respiratory virus (8), it has  
62 also been reported as a major pathogenic mediator of coxsackievirus B3-induced myocarditis (9).

63 Previously, we reported that Zika virus (ZIKV) infection of human fetal brain cells upregulates the  
64 expression of NOD2 (10) and here, we show that expression of this host protein promotes ZIKV  
65 replication. Using multiple human primary cell types, tissue explants, and cell lines, we found that  
66 the NOD2 blocking drug, GSK717, inhibits replication of flaviviruses, alphaviruses and SARS-  
67 CoV-2, the causative agent of COVID-19. The broad-spectrum activity of this drug is mediated in  
68 part by enhancement of the innate immune response. The RIPK2 blocking agent, GSK583, also  
69 potently inhibits these pathogenic RNA viruses. Together, data from our *in vitro* and *ex vivo*  
70 experiments suggest that nodosome inhibitors should be further investigated as broad-spectrum  
71 antivirals in preclinical studies.

## 72 **RESULTS**

### 73 **ZIKV infection induces the inflammasome in primary human fetal brain cells**

74 Previously, we reported that HFAs are likely the principal reservoirs for ZIKV infection and  
75 persistence in the human fetal brain (11). In a subsequent study (10), RNAseq analyses revealed  
76 that ZIKV infection of these cells upregulates multiple inflammasome genes including *GSDMD*,  
77 *IL-1  $\beta$* , *Casp1*, *NLRC5*, *GBP5*, and *NOD2*. In light of the recently identified links between the  
78 inflammasome and ZIKV neuropathogenesis (12, 13), we asked whether the activity of this  
79 multiprotein complex affected virus replication. Since our previous analysis (10) was performed  
80 using a strain of ZIKV not associated with microcephaly, we first confirmed that infection of HFAs  
81 with the pandemic ZIKV strain PRVABC-59 induced expression of multiple inflammasome genes.  
82 Indeed, *NOD2* and *GBP5* were upregulated more than 100-fold by ZIKV infection whereas other  
83 genes in this pathway were induced less than 50-fold (Fig. 1 A). Expression of inflammasome  
84 genes could also be induced by treatment of HFAs with human recombinant IFN- $\alpha$ , but less so

85 than with the double-strand RNA mimic poly(I:C) (Fig. 1 B and C, Fig. S1 A-D). This may indicate  
86 that detection of viral RNA *per se* triggers inflammasome induction.

87 **NOD2 expression promotes ZIKV multiplication by suppression of the innate immune**  
88 **response in HFAs**

89 As *NOD2* was one of the most upregulated inflammasome genes, we examined how reduced  
90 *NOD2* expression in HFAs affected replication of the PRVABC-59 strain of ZIKV. Compared to  
91 cells transfected with a non-targeting siRNA, replication of ZIKV in HFAs transfected with  
92 *NOD2*-specific siRNAs was significantly reduced (Fig. 2 A and B).

93 Recently, we reported that ZIKV-induced expression of fibroblast growth factor 2 in fetal brain  
94 increases viral replication by inhibiting the interferon response (10). As *NOD2* is an intracellular  
95 pattern recognition receptor that recognizes bacterial MDP as well as viral RNA (5), we questioned  
96 whether the effect of *NOD2* expression on viral replication was related to its actions on the innate  
97 immune response. To address this, relative expression of ISGs was determined in ZIKV-infected  
98 HFAs after *NOD2* silencing. *NOD2* knockdown was associated with significant upregulation of  
99 several important ISGs including *Viperin*, *OAS1*, and *MX2* (Fig. 2 C) as well as the prototypic  
100 inflammasome genes *GSDMD* and *Casp1* (Fig. 2 D). Of note, *NOD2* silencing reduced *NOD2*  
101 mRNA expression and was not cytotoxic for HFAs (Fig. S1 E and F).

102 **ZIKV replication and spread are inhibited by blocking NOD2 function in fetal brain**

103 A number of specific *NOD2* inhibitors have been developed to treat inflammatory diseases (14).  
104 To determine if these drugs have antiviral activity, HFAs infected with ZIKV were treated with or  
105 without subcytotoxic concentrations of the anti-*NOD2* compound, GSK717, for up to 72 hours.

106 GSK717 reduced viral titers in a concentration-dependent manner regardless of whether cells were  
107 infected at low or high MOI (Fig. 3 A and B).

108 We also investigated whether GSK717 could block ZIKV replication in explanted human fetal  
109 brain tissue as described previously (15). Data in Fig. 3 C-E show that GSK717 treatment  
110 significantly inhibited replication of viral genomic RNA and reduced viral titers of ZIKV by as  
111 much as 33-fold. Similar results were observed in human primary embryonic pulmonary  
112 fibroblasts (HEL-18) thus demonstrating that the antiviral effect of GSK717 is not limited to fetal  
113 brain tissue (Fig. S2 A-C).

#### 114 **NOD2 inhibitor blocks ZIKV infection and spread in multiple cell lines**

115 We next examined whether GSK717 also inhibits ZIKV replication in human non-prenatal cell  
116 types, including cell lines usually used for anti-flavivirus drug screening such as A549  
117 (pulmonary) and Huh7 (hepatoma) cells (16) as well as the astrocytoma cell line U251. GSK717  
118 significantly reduced ZIKV titers in these human cell lines in a dose-dependent manner regardless  
119 of whether low (0.05) and high (5) MOI were used for infection (Fig. S2 D-F). GSK717 also  
120 showed a concentration-dependent inhibitory effect on ZIKV replication in mouse embryonic  
121 fibroblasts (data not shown). Consistent with its ability to reduce viral titers, treatment with  
122 GSK717 significantly reduced the numbers of infected cells in A549 cultures (Fig. 4 A and B).  
123 Interestingly, GSK717 inhibited ZIKV replication even when added 12- or 24-hours post-infection  
124 (Fig. S2 G). None of the GSK717 concentrations used in the cell-based assays were cytotoxic at  
125 the examined time points (Fig. S3).

#### 126 **DENV replication is inhibited by the anti-NOD2 drug GSK717**

127 To determine if GSK717 could inhibit replication of other flaviviruses, we next focused on DENV,  
128 the most important arbovirus in terms of morbidity and mortality and the causative agent of  
129 Dengue Hemorrhagic Fever/Dengue Shock Syndrome (17). A549 cells infected with DENV-2  
130 strain 16681 (18) were treated with or without increasing concentrations of GSK717. Data in [Fig.](#)  
131 [5 A-C](#) show that GSK717 reduced DENV titers by >90% when used at 20-40  $\mu$ M. Blocking NOD2  
132 function with GSK717 also dramatically reduced the number of viral antigen positive-A549 cells  
133 after 48 hours of infection ([Fig. S4 A and B](#)).

134 Finally, as co-infections of DENV-2 with ZIKV have been reported in Latin American (19, 20)  
135 and South Asian countries (21), we assessed how GSK717 affected virus replication in A549  
136 simultaneously infected with ZIKV and DENV-2. Results from qRT-PCR analyses revealed that  
137 levels of both ZIKV and DENV genomic RNA were reduced by ~60% in GSK717-treated cells  
138 ([Fig. 5 D and E](#)).

### 139 **NOD2 function is important for replication of alphaviruses and coronaviruses**

140 Nodosome formation can be induced following infection by multiple types of RNA viruses (22).  
141 As such, we next determined whether GSK717 could inhibit replication of the mosquito-  
142 transmitted alphavirus, MAYV. The recent outbreak strain TRVL 15537 MAYV was used for  
143 these experiments. Supernatants from infected A549 cell cultures treated with or without GSK717  
144 were collected for viral titer determination at 48-hours post-infection after which plaque assays  
145 were performed. Similar to what was observed in flavivirus-infected cells, we found that GSK717  
146 reduced MAYV titers by as much as 95% ([Fig. 6 A and B](#)). MAYV and DENV-2 co-circulate in  
147 the same areas of South America and dual infections have been reported recently (23). Treatment  
148 of co-infected A549 cells with GSK717 resulted in significant inhibition of both DENV-2 and  
149 MAYV although replication of the latter was affected to a larger degree ([Fig. 6 C and D](#)).

150 Because SARS-CoV-2 infection reportedly activates the inflammasome *in vitro* (24) and in  
151 patients (25, 26), we tested how NOD2 inhibition affected replication of this pandemic  
152 coronavirus. A neuroblastoma cell line (SK-N-SH) stably expressing ACE2 was infected with a  
153 Canadian isolate of SARS-CoV-2 and treated with or without GSK717. At 48-hours post-infection,  
154 culture supernatants were collected for viral titer determination by plaque assay using Vero-E6  
155 cells. Data in [Fig. 6 E and F](#) show that pharmacological inhibition of NOD2 resulted in reduction  
156 of SARS-CoV-2 titers similar to what was observed with arboviruses.

### 157 **Inhibition of downstream RIPK2 supresses replication of multiple RNA viruses including** 158 **SARS-CoV-2**

159 RIPK2 is a critical mediator of NOD2 signalling. Binding of MDP to NOD2 leads to self-  
160 oligomerization of NOD2 molecules, followed by homotypic interactions between the C-terminal  
161 caspase activation and recruitment domain of NOD2 and RIPK2. This results in the activation of  
162 transcription factors that drive the expression of multiple proinflammatory cytokines, chemokines  
163 and anti-bacterial proteins (27).

164 Although RIPK2 mRNA was not upregulated in ZIKV infected-HFAs (10), we questioned whether  
165 pharmacological inhibition of this protein would also reduce replication of arboviruses such ZIKV,  
166 DENV-2 and MAYV. Infected A549 cells were treated with or without GSK583, a highly potent  
167 and selective inhibitor of the NOD2 binding domain of RIPK2 (28). Significant reduction in viral  
168 titers was observed in GSK583-treated cells infected with ZIKV, DENV-2 or MAYV at 12- and  
169 24-hours post-infection ([Fig. 7 A-C](#), [Fig. S5 A-D](#)). The antiviral action of GSK583 was  
170 corroborated in another human cell line, Huh7, infected with MAYV (MOI=0.1) (data not shown).



171 Similarly, indirect immunofluorescence microscopy analyses confirmed that inhibition of RIPK2  
172 reduced the number of viral antigen-positive cells in ZIKV, DENV-2 and MAYV-infected A549  
173 cultures (Fig. S6 A-D).

174 We tested the effect of GSK583 on replication of SARS-CoV-2 in ACE2-SK-N-SK cells. At 12  
175 and 24-hours post-infection, culture supernatants and cell lysates were collected for viral titer  
176 determination by plaque assay and viral ARN quantification using qRT-PCR. A significant  
177 concentration-dependent reduction in viral multiplication was observed in GSK583-treated cells  
178 (Fig. 7 D-F and Fig. S7 A). A time-of-addition assay (drug treatment at 0- and 24-hour post-  
179 infection) demonstrated that the RIPK2 inhibitor was able to reduce virus replication even when  
180 the drug was added well after viral infection had occurred (Fig. S7 B). Quantitation of infection  
181 by indirect immunofluorescence showed that GSK583 treatment reduced the numbers of infected  
182 cells in a monolayer culture (Fig. S7 C and D).

183 Finally, when RIPK2 inhibition experiments were conducted using Calu-3 and Huh7 cells for 24  
184 hours, ~60% and ~90% reduction in titers respectively were observed with the highest  
185 concentration of RIPK2 inhibitor (Fig. S8 A and B). No cytotoxic effect of GSK583 were detected  
186 in the cell lines used for coronavirus assays (Fig. S8 C-E).

## 187 **DISCUSSION**

188 ZIKV co-circulates in some of the same endemic regions as other arboviruses including  
189 chikungunya virus, DENV, and MAYV. Symptoms of acute infection caused by these arboviruses  
190 such as fever, rash, joint pain, and ocular manifestations are common which complicates clinical  
191 diagnosis of mono- and co-infections (17, 29, 30). Differential serological diagnosis is further  
192 hindered by flavivirus antigen cross-reactivity (17, 30). Given the issues with clinical/laboratory

193 diagnosis and lack of effective vaccines against most arboviruses, development of broad-spectrum  
194 antivirals against these pathogens should be a high priority.

195 The ongoing pandemic caused by SARS-CoV-2 poses a different set of challenges. Despite  
196 concerted efforts to repurpose and find new antiviral drugs (31-33), so far only remdesivir has  
197 shown modest efficacy in the acute stages of COVID-19 (34, 35). While more than 200 SARS-  
198 CoV-2 vaccine candidates are in accelerated development at preclinical and clinical stages (36), it  
199 will likely take another year or more before they are broadly available to the general population as  
200 safety and efficacy still need to be evaluated (37, 38).

201 In this study, we characterized the broad-spectrum antiviral activities of nodosome inhibitors  
202 GSK717 and GSK583. These small molecules display robust antiviral action against multiple RNA  
203 viruses and may hold promise as pan-flavivirus inhibitors. First, we showed that NOD2 expression  
204 promotes ZIKV multiplication in HFAs which are the main target of this flavivirus in the fetal  
205 brain (10, 11). Next, we demonstrated that the NOD2 inhibitor GSK717 blocks infection by and  
206 spread of ZIKV in human fetal brain and cell lines. NOD2 inhibition also reduced replication of  
207 the related DENV, the alphavirus MAYV and the pandemic coronavirus SARS-CoV-2. Blocking  
208 the NOD2 downstream signaling kinase RIPK2 with GSK583 (which does not affect its catalytic  
209 activity) significantly inhibited replication of these viral pathogens.

210 Gefitinib is an FDA-approved drug for treatment of lung, breast and other cancers. It works by  
211 reducing the activity of the epidermal growth factor receptor (EGFR) tyrosine kinase domains. Of  
212 note, this drug also inhibits the tyrosine kinase activity of RIPK2 (39) and has been shown to  
213 inhibit replication of DENV and release of pro-inflammatory cytokines from infected human  
214 primary monocytes (40). The authors suggested a role for EGFR/RIPK2 in DENV pathogenesis  
215 and that gefitinib may be beneficial in the treatment of dengue patients. Similarly, the work here

216 which demonstrated the antiviral activity of NOD2 and RIPK2 inhibitors using tissue explants,  
217 primary cells and cell lines, support the potential clinical use of these compounds in mono or co-  
218 infections by arboviruses as well as coronavirus infections at early and/or advanced stages.

219 As GSK717 and GSK583 were developed primarily for immune-mediated inflammatory  
220 conditions, their anti-inflammatory effects may have the added benefit of reducing the  
221 hyperinflammatory state associated with flavi-, alpha- and coronavirus diseases (17, 29, 30, 41).  
222 Finally, our findings raise potential concerns regarding adjuvants in viral vaccines that augment  
223 NOD2 as an immune strategy (42, 43) since this immune signaling protein is not a restriction factor  
224 but rather an enhancement factor for multiple pathogenic RNA viruses.

225 The current study illustrates how the identification of a drug target through transcriptomic analyses  
226 of virus-infected cells can lead to novel broad-acting host-directed antiviral strategies with a high  
227 barrier of resistance. Increased NOD2 expression may be a novel mechanism of immune evasion  
228 that viruses use to evade the innate immune response. Conversely, drugs that block nodosome  
229 formation appear to have broad-spectrum antiviral activity by enhancing the interferon response.  
230 Collectively, our results warrant consideration of these and related compounds as broad-spectrum  
231 antiviral drug candidates for further preclinical development.

## 232 **MATERIALS AND METHODS**

233 **Ethical Approval.** Human fetal brain tissues were obtained from 15-19-week aborted fetuses with  
234 written consent from the donor parents and prior approval under protocol 1420 (University of  
235 Alberta Human Research Ethics Board).

236 **Cells, explant cultures and viruses.** ZIKV (PRVABC-59), Dengue virus (DENV-2, 16681), and  
237 Mayaro virus (MAYV, TRVL 15537) were propagated in *Aedes albopictus* C6/36 cells grown in

238 Minimum Essential Medium (MEM, Thermo Fisher Scientific, Waltham, MA). SARS-CoV-2  
239 (SARS-CoV-2/CANADA/VIDO 01/2020) was propagated in Vero-E6 cells grown in Dulbecco's  
240 Modified Eagle Medium (DMEM, Thermo Fisher Scientific). A549, Huh7, U251, Vero (ATCC,  
241 Manassas, VA) and ACE2-hyperexpressing SK-N-SH cells were maintained in DMEM while  
242 HEL-18 human primary embryonic pulmonary fibroblasts and Calu-3 cells (ATCC) were  
243 maintained in Roswell Park Memorial Institute 1640 medium (RPMI, Thermo Fisher Scientific)  
244 and MEM respectively. Human fetal astrocytes (HFAs) and fetal brain tissue explants were  
245 prepared from multiple donations (n=8), as described previously (15). For infection, cells or tissue  
246 explants were incubated with virus (MOI 0.05-5) for 1-2 hr or overnight respectively at 37°C using  
247 fresh media supplemented with fetal bovine serum (Thermo Fisher Scientific). For co-infection  
248 assays, A549 cells were infected simultaneously with DENV-2 and ZIKV or MAYV at an MOI  
249 of 0.1 for 3 hours. Culture of cells, tissue explants, construction of the ACE2-SK-N-SH cells, and  
250 viral infections are described in more detail in [Supplemental Material](#).

251 **qRT-PCR.** RNA from cells and tissue was extracted using NucleoSpin RNA (Macherey-Nagel  
252 GmbH & Co, Düren, Germany) kits. Real-time qRT-PCR was performed in a CFX96 Touch Real-  
253 Time PCR Detection System instrument (Bio-Rad, Hercules, CA) using ImProm-II Reverse  
254 Transcriptase (Promega, Madison, WI). For more details about the protocols, and primers used in  
255 this work please see [Supplemental Material](#).

256 **Poly(I:C) transfection.** HFAs grown in 96-well plates (Greiner, Kremsmünster, Austria) were  
257 transfected with polyinosinic:polycytidylic acid (Poly(I:C) (Sigma-Aldrich, St. Louis, MO) at a  
258 concentration of 0.02 or 0.1 µg/well using TransIT (0.3 µL/well, Mirus Bio LLC, Madison, WI).  
259 At 12 hours post-transfection, total RNA was extracted and transcripts levels for IFN-stimulated  
260 genes (ISGs) were quantified by qRT-PCR.

261 **Human recombinant INF- $\alpha$  assay.** HFAs in 96-well plates (Greiner) were treated with or without  
262 25-100 U/mL of human recombinant IFN- $\alpha$  (Sigma-Aldrich) for 4-12 hours after which total RNA  
263 was isolated and subjected to qRT-PCR in order to measure expression of ISGs.

264 **Viral titer assay.** Titers were determined in Vero CCL-81 and Vero-E6 for arboviruses  
265 (flaviviruses and alphaviruses) and coronaviruses respectively. [Supplemental Material](#) provides a  
266 more detailed description of the assay.

267 **NOD2 silencing.** Cells were seeded in 96-well plates (Greiner) overnight before transfection with  
268 20 nM of NOD2 DsiRNA hs.Ri.NOD2.13.2 from Integrated DNA Technologies (IDT, Coralville,  
269 IA) using 0.3  $\mu$ g/well RNAiMax (Invitrogen, Waltham, MA). The non-targeting IDT control  
270 DsiRNA was used as negative control for transfection. Twenty-four hours later, cells were infected  
271 with ZIKV using MOI of 0.05. At 24 and 48-hours post-infection, culture supernatants were  
272 collected for plaque assay. Total RNA isolated from cells at 48-hours post-infection was subjected  
273 to qRT-PCR to determine levels of viral genomic RNA and ISGs.

274 **Measurement of cell viability.** Cell viability assays in response to drug or DMSO treatment were  
275 performed using CellTiter-Glo Luminescent Cell Viability kit (Promega) in cells grown in 96-well  
276 plates (Greiner) as described in the [Supplemental Material](#).

277 ***In vitro* and *ex vivo* drug assays.** After drug or DMSO treatment, viral replication and titers were  
278 determined by qRT-PCR on total RNA extracted from cells or tissues and plaque assay of culture  
279 supernatants respectively 12 to 72-hours post-infection. Cells seeded into 96-well plates (Greiner)  
280 were infected with ZIKV, DENV-2, MAYV or SARS-CoV-2 (MOI=0.05-5) followed by  
281 treatment with 5, 10, 20 and 40  $\mu$ M GSK717 (14) (Sigma-Aldrich) or DMSO.

282 Fetal brain tissue explants were treated after ZIKV infection with GSK717 (20-40  $\mu$ M) or DMSO  
283 for 3 days. Viral titer determination in culture supernatants daily and viral genome quantification  
284 in tissues at 72 hours post-infection were performed.

285 A549 or ACE2-SK-N-SH cells on coverslips in 12-well plates (Greiner) were infected (MOI of  
286 1.0) with arboviruses (ZIKV, DENV-2 or MAYV) or SARS-CoV2 respectively and then  
287 processed for indirect immunofluorescence. Arbovirus co-infection assays and time-of-addition  
288 assays were conducted in A549 cells while SARS-CoV-2 time-of-addition assays were performed  
289 in ACE2-SK-N-SH using an MOI of 0.1. Viral genome quantification and viral titer determination  
290 were performed in the co-infection and time-of-addition assays, respectively.

291 A549 cells infected with arboviruses or ACE2-SK-N-SH cells infected with SARS-CoV-2  
292 (MOI=0.05-5) were treated with the RIPK2 inhibitor GSK583 (28) (Sigma-Aldrich) for 24 hours.  
293 Cell supernatants and total cellular RNA were collected for determining viral titers and viral RNA  
294 respectively. Please, see [Supplemental Material](#) for additional information about the drug assays.

295 **Immunofluorescence staining and cell imaging.** Infected cells grown on coverslips were fixed  
296 with 4% paraformaldehyde and permeabilized/blocked with a Triton-X100 (0.2%)/BSA (3%)  
297 solution and then incubated with mouse anti-Flavivirus Group Antigen 4G2 (Millipore,  
298 Burlington, MA), mouse anti-alphavirus capsid (kindly provided by Dr. Andres Merits at  
299 University of Tartu), or mouse anti-spike SARS-CoV/SARS-CoV-2 (GenTex, Irvine, CA) at room  
300 temperature for 1.5 hour, washed and then incubated with Alexa Fluor secondary antibodies  
301 against mouse and DAPI for 1 hour at room temperature. Antibodies were diluted in Blocking  
302 buffer. PBS containing 0.3% BSA was used for wash steps. Samples were examined using an  
303 Olympus 1x81 spinning disk confocal microscope (Tokyo, Japan) or Cytation 5 Cell Imaging

304 Multi-Mode Reader instrument (Biotek, Winooski, VT). Images were analyzed using Volocity or  
305 Gen5 software. More experimental details are provided in the [Supplemental Material](#).

306 **Statistical analyses.** A paired Student's t-test was used for pair-wise statistical comparison. The  
307 standard error of the mean is shown in all bar graphs. GraphPad Prism software 5.0 (GraphPad  
308 Software Inc., La Jolla, CA) was used in all statistical analyses.

### 309 **ACKNOWLEDGEMENTS**

310 This work was supported by grants from the Canadian Institutes of Health Research (grants PJT-  
311 148699, OV3-172302, PJT-162417) and the Li Ka Shing Institute of Virology to T. C. H. The  
312 funders had no role in study design, data collection and interpretation, or the decision to submit  
313 the work for publication.

314 We wish to thank Dr. Anil Kumar, Dr. Joaquin Lopez Orozco, Dr. Adriana Airo, Dr. Zaikun Xu,  
315 Cheung Pang Wong, and Ray Ishida in the Hobman lab for helpful discussions and support.  
316 Confocal imaging was performed at the Cell Imaging Centre core in the Faculty of Medicine &  
317 Dentistry of the University of Alberta. We thank Dr. Darryl Falzarano (Vaccine and Infectious  
318 Disease Organization-International Vaccine Centre, University of Saskatchewan, Canada) for  
319 providing the Canadian SARS-CoV-2 strain for this work, Dr. David Safronetz (Public Health  
320 Agency of Canada, Canada) for providing the ZIKV strain, Dr. Bart Bartenschlager (Heidelberg  
321 University Hospital, Germany) for donating the DENV-2 clone, Dr. Eva Gönczöl (The Wistar  
322 Institute, USA) for providing the HEL-18 cells, and Dr. Andres Merits (University of Tartu,  
323 Estonia) for kindly donating the anti-alphavirus capsid antibody. Furthermore, we thank Eileen  
324 Reklow and Valeria Mancinelli for excellent technical support.

325 We declare no competing financial interests.

326 **Figure legends**

327 **Fig. 1. Inflammasome gene expression in HFAs is induced by ZIKV, IFN- $\alpha$  and Poly(I:C).**

328 (A) Relative inflammasome gene expression in HFAs infected with PRVABC-59 ZIKV  
329 (MOI=0.3) was determined by qRT-PCR 48-hours post-infection. (B) HFAs were treated with  
330 human recombinant IFN- $\alpha$  for 4, 8 and 12 hours after which relative *NOD2* expression was  
331 determined. (C) HFAs were transfected with Poly(I:C) for 12 hours after which relative  
332 inflammasome gene expression was determined. Error bars represent standard errors of the mean.  
333 \* $P < 0.05$ , \*\* $P < 0.01$ , and \*\*\* $P < 0.001$ , by the Student *t* test.

334 **Fig. 2. NOD2 silencing suppresses ZIKV multiplication and enhances the expression of**

335 **interferon-stimulated and inflammasome genes.** HFAs were transfected with NOD2-specific  
336 or non-silencing siRNAs for 24-hours and then infected with ZIKV (MOI=0.05). Cell culture  
337 media or total cellular RNA were harvested after 24- and 48-hours for plaque assay (A) or qRT-  
338 PCR at 48-hours post-infection. Relative levels of viral genome (B), and interferon-stimulated  
339 genes (C) *Viperin*, 2'-5'-oligoadenylate synthetase 1 (*OAS1*) and Myxovirus resistance protein 2  
340 (*MX2*) as well as inflammasome genes (D) gasdermin D (*GSDMD*) and Caspase 1 (*Casp1*) are  
341 shown. Values are expressed as the mean of three independent experiments. Error bars represent  
342 standard errors of the mean. \* $P < 0.05$ , and \*\*\* $P < 0.001$ , by the Student *t* test.

343 **Fig. 3. The anti-NOD2 drug GSK717 inhibits ZIKV replication.** ZIKV-infected HFAs

344 (MOI=0.05-5) were treated with DMSO or NOD2 blocking agent GSK717 after which viral titers  
345 were determined daily for up to 72-hours post-infection. ZIKV titers as relative fold (MOI=0.05)  
346 for 72 hours (A) and as PFU/mL at 48 hours post-infection (MOI=5) (B) are shown. Explants of  
347 human fetal brain (15-19 week old donors) were infected with the microcephalic ZIKV strain  
348 PRVABC-59 followed by GSK717 or DMSO treatment. Viral titers are shown as relative fold for



349 72 hours (**C**) and as PFU/mL at 48 hours post-infection (**D**). At 72 hours, the explant tissue was  
350 collected for viral RNA quantitation by qRT-PCR (**E**). Values are expressed as the mean of three  
351 independent experiments. Error bars represent standard errors of the mean.  $*P < 0.05$ ,  $**P < 0.01$ ,  
352 and  $***P < 0.001$ , by the Student *t* test.

353 **Fig. 4. The anti-NOD2 drug GSK717 blocks the spread of ZIKV infection.** (**A**) Representative  
354 confocal imaging (20X) showing antiviral effect of GSK717 at 20  $\mu$ M and 40  $\mu$ M. A549 cells  
355 were infected with ZIKV (MOI=1) followed by treatment with DMSO or GSK717 at 20 or 40  $\mu$ M  
356 for 48 hours before processing for indirect immunofluorescence. ZIKV-infected cells were  
357 identified using a mouse monoclonal antibody (4G2) to envelope protein and Alexa Fluor 488  
358 donkey anti-mouse to detect the primary antibody. Nuclei were stained with DAPI. Images were  
359 acquired using a spinning disk confocal microscope equipped with Volocity 6.2.1 software. (**B**)  
360 Infected cells in 10 different fields from samples treated with GSK717 or DMSO were counted.  
361 Values are expressed as the mean of three independent experiments. Error bars represent standard  
362 errors of the mean.  $**P < 0.01$ , by the Student *t* test.

363 **Fig. 5. The anti-NOD2 drug GSK717 inhibits DENV replication.** A549 cells were infected with  
364 DENV-2 (MOI=0.05-5) and treated with GSK717 or DMSO for 48-hours after which cell culture  
365 media were harvested for plaque assay. Viral titers as relative fold using MOI of 0.05 or 5 (**A**) and  
366 as PFU/mL using MOI of 0.05 (**B**) or 5 (**C**) are shown. Cells were co-infected with DENV-2 and  
367 ZIKV (MOI=0.1) followed by GSK717 or DMSO treatment for 48 hours before collecting total  
368 cellular RNA for qRT-PCR. Viral RNA levels as relative fold (**D**) and as relative to mock (**E**) are  
369 presented. Values are expressed as the mean of three independent experiments. Error bars represent  
370 standard errors of the mean.  $*P < 0.05$ ,  $**P < 0.01$ , and  $***P < 0.001$ , by the Student *t* test.

371 **Fig. 6. The anti-NOD2 drug GSK717 inhibits replication of MAYV and SARS-CoV-2**  
372 **infection.** A549 cells infected with low (0.05) and high (5) MOI of MAYV were treated with  
373 GSK717 or DMSO for 48 hours followed by collection of supernatants for plaque assay. Relative  
374 (A) and absolute (B) viral titers are shown with both MOI and with MOI of 0.05 respectively. Cells  
375 co-infected with MAYV and DENV-2 (MOI=0.1) were treated for 48 hours with GSK717 or  
376 DMSO before total cellular RNA was collected for qRT-PCR. Viral RNA data as relative fold (C)  
377 and as relative to mock (D) are shown. ACE2-SK-N-SH were infected with SARS-CoV-2  
378 (MOI=0.05-5) and treated with GSK717 or DMSO for 48 hours after which culture supernatants  
379 were harvested for plaque assay. Viral titers as relative fold (E) and as PFU/mL (F) are shown  
380 using both MOI and the MOI of 0.05 respectively. Values are expressed as the mean of three  
381 independent experiments. Error bars represent standard errors of the mean. \* $P < 0.05$ , \*\* $P < 0.01$ ,  
382 and \*\*\* $P < 0.001$ , by the Student  $t$  test.

383 **Fig. 7. The anti-RIPK2 drug GSK583 has broad-spectrum antiviral activity.** (A) A549 cells  
384 infected separately with three different arboviruses (MOI=0.1) were treated with the RIPK2  
385 inhibitor GSK583 or DMSO alone for 24 hours followed by supernatant collection for plaque  
386 assay. Arbovirus titers as relative fold is presented. Cells were infected with ZIKV (B) or MAYV  
387 (C) at the MOI of 0.1 followed by the addition of GSK583 or DMSO immediately after infection  
388 (0 hours) or 24 hours post-infection. Viral titers, shown as relative fold, in supernatants were  
389 determined 24 hours after the treatment. ACE2-SK-N-SH cells infected with SARS-CoV-2 at low  
390 (0.05) and high (5) MOI were treated with GSK583 or DMSO for 24 hours followed by supernatant  
391 and total cellular RNA collection. Viral titers using both MOI as relative fold (D) and using MOI  
392 of 0.05 as PFU/mL (E) are shown. Relative viral RNA to mock level (F) with the MOI of 0.05 is

393 shown. Values are expressed as the mean of three independent experiments. Error bars represent  
394 standard errors of the mean. \* $P < 0.05$ , \*\* $P < 0.01$ , and \*\*\* $P < 0.001$ , by the Student  $t$  test.

## 395 REFERENCES

- 396 1. Brechot C, Bryant J, Endtz H, Garry RF, Griffin DE, Lewin SR, Mercer N, Osterhaus A,  
397 Picot V, Vahlne A, Verjans GMGM, Weaver S. 2019. 2018 international meeting of the  
398 Global Virus Network. *Antiviral Res* 163:140-148.
- 399 2. De Clercq E, Li G. 2016. Approved Antiviral Drugs over the Past 50 Years. *Clin*  
400 *Microbiol Rev* 29:695-747.
- 401 3. Ianevski A, Andersen PI, Merits A, Bjørås M, Kainov D. 2019. Expanding the activity  
402 spectrum of antiviral agents. *Drug Discov Today* 24:1224-1228.
- 403 4. Ianevski A, Zusinaite E, Kuivanen S, Strand M, Lysvand H, Teppor M, Kakkola L,  
404 Paavilainen H, Laajala M, Kallio-Kokko H, Valkonen M, Kantele A, Telling K, Lutsar I,  
405 Letjuka P, Metelitsa N, Oksenych V, Bjørås M, Nordbø SA, Dumpis U, Vitkauskiene A,  
406 Öhrmalm C, Bondeson K, Bergqvist A, Aittokallio T, Cox RJ, Evander M, Hukkanen V,  
407 Marjomaki V, Julkunen I, Vapalahti O, Tenson T, Merits A, Kainov D. 2018. Novel  
408 activities of safe-in-human broad-spectrum antiviral agents. *Antiviral Res* 154:174-182.
- 409 5. Mukherjee T, Hovingh ES, Foerster EG, Abdel-Nour M, Philpott DJ, Girardin SE. 2019.  
410 NOD1 and NOD2 in inflammation, immunity and disease. *Arch Biochem Biophys*  
411 670:69-81.
- 412 6. Cardinaud S, Urrutia A, Rouers A, Coulon PG, Kervevan J, Richetta C, Bet A, Maze EA,  
413 Larsen M, Iglesias MC, Appay V, Graff-Dubois S, Moris A. 2017. Triggering of TLR-3,  
414 -4, NOD2, and DC-SIGN reduces viral replication and increases T-cell activation  
415 capacity of HIV-infected human dendritic cells. *Eur J Immunol* 47:818-829.

- 416 7. Kapoor A, Forman M, Arav-Boger R. 2014. Activation of nucleotide oligomerization  
417 domain 2 (NOD2) by human cytomegalovirus initiates innate immune responses and  
418 restricts virus replication. *PLoS One* 9:e92704.
- 419 8. Vissers M, Remijn T, Oosting M, de Jong DJ, Diavatopoulos DA, Hermans PW,  
420 Ferwerda G. 2012. Respiratory syncytial virus infection augments NOD2 signaling in an  
421 IFN- $\beta$ -dependent manner in human primary cells. *Eur J Immunol* 42:2727-35.
- 422 9. Tschöpe C, Müller I, Xia Y, Savvatis K, Pappritz K, Pinkert S, Lassner D, Heimesaat  
423 MM, Spillmann F, Miteva K, Bereswill S, Schultheiss HP, Fechner H, Pieske B, Kühl U,  
424 Van Linthout S. 2017. NOD2 (Nucleotide-Binding Oligomerization Domain 2) Is a  
425 Major Pathogenic Mediator of Coxsackievirus B3-Induced Myocarditis. *Circ Heart Fail*  
426 10.
- 427 10. Limonta D, Jovel J, Kumar A, Lu J, Hou S, Airo AM, Lopez-Orozco J, Wong CP, Saito  
428 L, Branton W, Ka-Shu Wong G, Mason A, Power C, Hobman TC. 2019. Fibroblast  
429 growth factor 2 enhances Zika virus infection in human fetal brain. *J Infect Dis*  
430 220:1377–1387.
- 431 11. Limonta D, Jovel J, Kumar A, Airo AM, Hou S, Saito L, Branton W, Ka-Shu Wong G,  
432 Mason A, Power C, Hobman TC. 2018. Human Fetal Astrocytes Infected with Zika Virus  
433 Exhibit Delayed Apoptosis and Resistance to Interferon: Implications for Persistence.  
434 *Viruses* 10.
- 435 12. de Sousa JR, Azevedo RDS, Martins Filho AJ, de Araujo MTF, Cruz EDRM,  
436 Vasconcelos BCB, Cruz ACR, de Oliveira CS, Martins LC, Vasconcelos BHB, Casseb  
437 LMN, Chiang JO, Quaresma JAS, Vasconcelos PFDC. 2018. In situ inflammasome

- 438 activation results in severe damage to the central nervous system in fatal Zika virus  
439 microcephaly cases. *Cytokine* 111:255-264.
- 440 13. Tricarico PM, Caracciolo I, Crovella S, D'Agaro P. 2017. Zika virus induces  
441 inflammasome activation in the glial cell line U87-MG. *Biochem Biophys Res Commun*  
442 492:597-602.
- 443 14. Rickard DJ, Sehon CA, Kasparcova V, Kallal LA, Zeng X, Montoute MN, Chordia T,  
444 Poore DD, Li H, Wu Z, Eidam PM, Haile PA, Yu J, Emery JG, Marquis RW, Gough PJ,  
445 Bertin J. 2013. Identification of benzimidazole diamides as selective inhibitors of the  
446 nucleotide-binding oligomerization domain 2 (NOD2) signaling pathway. *PLoS One*  
447 8:e69619.
- 448 15. Limonta D, Branton W, Wong CP, Saito L, Power C, Hobman TC. 2020. Use of Primary  
449 Human Fetal Astrocytes and Tissue Explants as Ex Vivo Models to Study Zika Virus  
450 Infection of the Developing Brain. *Methods Mol Biol* 2142:251-259.
- 451 16. Mumtaz N, Jimmerson LC, Bushman LR, Kiser JJ, Aron G, Reusken CBEM, Koopmans  
452 MPG, van Kampen JJA. 2017. Cell-line dependent antiviral activity of sofosbuvir against  
453 Zika virus. *Antiviral Res* 146:161-163.
- 454 17. Katzelnick LC, Coloma J, Harris E. 2017. Dengue: knowledge gaps, unmet needs, and  
455 research priorities. *Lancet Infect Dis* 17:e88-e100.
- 456 18. Kinney RM, Butrapet S, Chang GJ, Tsuchiya KR, Roehrig JT, Bhamarapravati N, Gubler  
457 DJ. 1997. Construction of infectious cDNA clones for dengue 2 virus: strain 16681 and  
458 its attenuated vaccine derivative, strain PDK-53. *Virology* 230:300-8.
- 459 19. Silva MMO, Tauro LB, Kikuti M, Anjos RO, Santos VC, Gonçalves TSF, Paploski IAD,  
460 Moreira PSS, Nascimento LCJ, Campos GS, Ko AI, Weaver SC, Reis MG, Kitron U,

- 461           Ribeiro GS. 2019. Concomitant Transmission of Dengue, Chikungunya, and Zika Viruses  
462           in Brazil: Clinical and Epidemiological Findings From Surveillance for Acute Febrile  
463           Illness. *Clin Infect Dis* 69:1353-1359.
- 464   20.    Carrillo-Hernández MY, Ruiz-Saenz J, Villamizar LJ, Gómez-Rangel SY, Martínez-  
465           Gutierrez M. 2018. Co-circulation and simultaneous co-infection of dengue,  
466           chikungunya, and zika viruses in patients with febrile syndrome at the Colombian-  
467           Venezuelan border. *BMC Infect Dis* 18:61.
- 468   21.    Chia PY, Yew HS, Ho H, Chow A, Sadarangani SP, Chan M, Kam YW, Chong CY,  
469           Thoon KC, Yung CF, Li JH, Lye DC, De PP, Ng LFP, Yeo TW, Leo YS. 2017. Clinical  
470           features of patients with Zika and dengue virus co-infection in Singapore. *J Infect*  
471           74:611-615.
- 472   22.    Keestra-Gounder AM, Tsolis RM. 2017. NOD1 and NOD2: Beyond Peptidoglycan  
473           Sensing. *Trends Immunol* 38:758-767.
- 474   23.    de Souza Costa MC, Siqueira Maia LM, Costa de Souza V, Gonzaga AM, Correa de  
475           Azevedo V, Ramos Martins L, Chavez Pavoni JH, Gomes Naveca F, Dezengrini  
476           Slhessarenko R. 2019. Arbovirus investigation in patients from Mato Grosso during Zika  
477           and Chikungunya virus introduction in Brazil, 2015-2016. *Acta Trop* 190:395-402.
- 478   24.    Ratajczak MZ, Bujko K, Ciechanowicz A, Sielatycka K, Cymer M, Marlicz W, Kucia M.  
479           2020. SARS-CoV-2 Entry Receptor ACE2 Is Expressed on Very Small CD45. *Stem Cell*  
480           Rev Rep.
- 481   25.    Hoel H, Heggelund L, Reikvam DH, Stiksrud B, Ueland T, Michelsen AE, Otterdal K,  
482           Muller KE, Lind A, Muller F, Dudman S, Aukrust P, Dyrhol-Riise AM, Holter JC,

- 483 Trøseid M. 2020. Elevated markers of gut leakage and inflammasome activation in  
484 COVID-19 patients with cardiac involvement. *J Intern Med*.
- 485 26. Toldo S, Bussani R, Nuzzi V, Bonaventura A, Mauro AG, Cannatà A, Pillappa R,  
486 Sinagra G, Nana-Sinkam P, Sime P, Abbate A. 2020. Inflammasome formation in the  
487 lungs of patients with fatal COVID-19. *Inflamm Res*.
- 488 27. Humphries F, Yang S, Wang B, Moynagh PN. 2015. RIP kinases: key decision makers in  
489 cell death and innate immunity. *Cell Death Differ* 22:225-36.
- 490 28. Haile PA, Votta BJ, Marquis RW, Bury MJ, Mehlmann JF, Singhaus R, Charnley AK,  
491 Lakdawala AS, Convery MA, Lipshutz DB, Desai BM, Swift B, Capriotti CA, Berger  
492 SB, Mahajan MK, Reilly MA, Rivera EJ, Sun HH, Nagilla R, Beal AM, Finger JN, Cook  
493 MN, King BW, Ouellette MT, Totoritis RD, Pierdomenico M, Negroni A, Stronati L,  
494 Cucchiara S, Ziólkowski B, Vossenkämper A, MacDonald TT, Gough PJ, Bertin J,  
495 Casillas LN. 2016. The Identification and Pharmacological Characterization of 6-(tert-  
496 Butylsulfonyl)-N-(5-fluoro-1H-indazol-3-yl)quinolin-4-amine (GSK583), a Highly  
497 Potent and Selective Inhibitor of RIP2 Kinase. *J Med Chem* 59:4867-80.
- 498 29. Acosta-Ampudia Y, Monsalve DM, Rodríguez Y, Pacheco Y, Anaya JM, Ramírez-  
499 Santana C. 2018. Mayaro: an emerging viral threat? *Emerg Microbes Infect* 7:163.
- 500 30. Pierson TC, Diamond MS. 2018. The emergence of Zika virus and its new clinical  
501 syndromes. *Nature* 560:573-581.
- 502 31. Chen P, Nirula A, Heller B, Gottlieb RL, Boscia J, Morris J, Huhn G, Cardona J,  
503 Mocherla B, Stosor V, Shawa I, Adams AC, Van Naarden J, Custer KL, Shen L, Durante  
504 M, Oakley G, Schade AE, Sabo J, Patel DR, Klekotka P, Skovronsky DM, Investigators

- 505 B-. 2020. SARS-CoV-2 Neutralizing Antibody LY-CoV555 in Outpatients with Covid-  
506 19. *N Engl J Med*.
- 507 32. Stone JH, Frigault MJ, Serling-Boyd NJ, Fernandes AD, Harvey L, Foulkes AS, Horick  
508 NK, Healy BC, Shah R, Bensaci AM, Woolley AE, Nikiforow S, Lin N, Sagar M,  
509 Schragger H, Huckins DS, Axelrod M, Pincus MD, Fleisher J, Sacks CA, Dougan M,  
510 North CM, Halvorsen YD, Thurber TK, Dagher Z, Scherer A, Wallwork RS, Kim AY,  
511 Schoenfeld S, Sen P, Neilan TG, Perugino CA, Unizony SH, Collier DS, Matza MA,  
512 Yinh JM, Bowman KA, Meyerowitz E, Zafar A, Drobni ZD, Bolster MB, Kohler M,  
513 D'Silva KM, Dau J, Lockwood MM, Cubbison C, Weber BN, Mansour MK,  
514 Investigators BBTT. 2020. Efficacy of Tocilizumab in Patients Hospitalized with Covid-  
515 19. *N Engl J Med*.
- 516 33. Glasgow A, Glasgow J, Limonta D, Solomon P, Lui I, Zhang Y, Nix MA, Rettko NJ, Zha  
517 S, Yamin R, Kao K, Rosenberg OS, Ravetch JV, Wiita AP, Leung KK, Lim SA, Zhou  
518 XX, Hobman TC, Kortemme T, Wells JA. 2020. Engineered ACE2 receptor traps  
519 potently neutralize SARS-CoV-2. *Proc Natl Acad Sci U S A*.
- 520 34. Goldman JD, Lye DCB, Hui DS, Marks KM, Bruno R, Montejano R, Spinner CD, Galli  
521 M, Ahn MY, Nahass RG, Chen YS, SenGupta D, Hyland RH, Osinusi AO, Cao H, Blair  
522 C, Wei X, Gaggar A, Brainard DM, Towner WJ, Muñoz J, Mullane KM, Marty FM,  
523 Tashima KT, Diaz G, Subramanian A, Investigators G-U--. 2020. Remdesivir for 5 or 10  
524 Days in Patients with Severe Covid-19. *N Engl J Med*.
- 525 35. Beigel JH, Tomashek KM, Dodd LE, Mehta AK, Zingman BS, Kalil AC, Hohmann E,  
526 Chu HY, Luetkemeyer A, Kline S, Lopez de Castilla D, Finberg RW, Dierberg K,  
527 Tapson V, Hsieh L, Patterson TF, Paredes R, Sweeney DA, Short WR, Touloumi G, Lye



- 528 DC, Ohmagari N, Oh MD, Ruiz-Palacios GM, Benfield T, Fätkenheuer G, Kortepeter  
529 MG, Atmar RL, Creech CB, Lundgren J, Babiker AG, Pett S, Neaton JD, Burgess TH,  
530 Bonnett T, Green M, Makowski M, Osinusi A, Nayak S, Lane HC, Members A-SG.  
531 2020. Remdesivir for the Treatment of Covid-19 - Final Report. *N Engl J Med*.
- 532 36. WHO. 2020 Draft landscape of COVID-19 candidate vaccines. Accessed October 20,  
533 2020
- 534 37. Rubin EJ, Baden LR, Piot P, Morrissey S. 2020. Audio Interview: New SARS-CoV-2  
535 Vaccine Results, with Peter Piot. *N Engl J Med* 383:e57.
- 536 38. Hodgson SH, Mansatta K, Mallett G, Harris V, Emary KRW, Pollard AJ. 2020. What  
537 defines an efficacious COVID-19 vaccine? A review of the challenges assessing the  
538 clinical efficacy of vaccines against SARS-CoV-2. *Lancet Infect Dis*.
- 539 39. Tigno-Aranjuez JT, Asara JM, Abbott DW. 2010. Inhibition of RIP2's tyrosine kinase  
540 activity limits NOD2-driven cytokine responses. *Genes Dev* 24:2666-77.
- 541 40. Duran A, Valero N, Mosquera J, Fuenmayor E, Alvarez-Mon M. 2017. Gefitinib and  
542 pyrrolidine dithiocarbamate decrease viral replication and cytokine production in dengue  
543 virus infected human monocyte cultures. *Life Sci* 191:180-185.
- 544 41. Wiersinga WJ, Rhodes A, Cheng AC, Peacock SJ, Prescott HC. 2020. Pathophysiology,  
545 Transmission, Diagnosis, and Treatment of Coronavirus Disease 2019 (COVID-19): A  
546 Review. *JAMA*.
- 547 42. Gutjahr A, Papagno L, Vernejoul F, Lioux T, Jospin F, Chanut B, Perouzel E, Rochereau  
548 N, Appay V, Verrier B, Paul S. 2020. New chimeric TLR7/NOD2 agonist is a potent  
549 adjuvant to induce mucosal immune responses. *EBioMedicine* 58:102922.

550 43. Shafique M, Wilschut J, de Haan A. 2012. Induction of mucosal and systemic immunity  
551 against respiratory syncytial virus by inactivated virus supplemented with TLR9 and  
552 NOD2 ligands. *Vaccine* 30:597-606.

553

**FIG 1****A**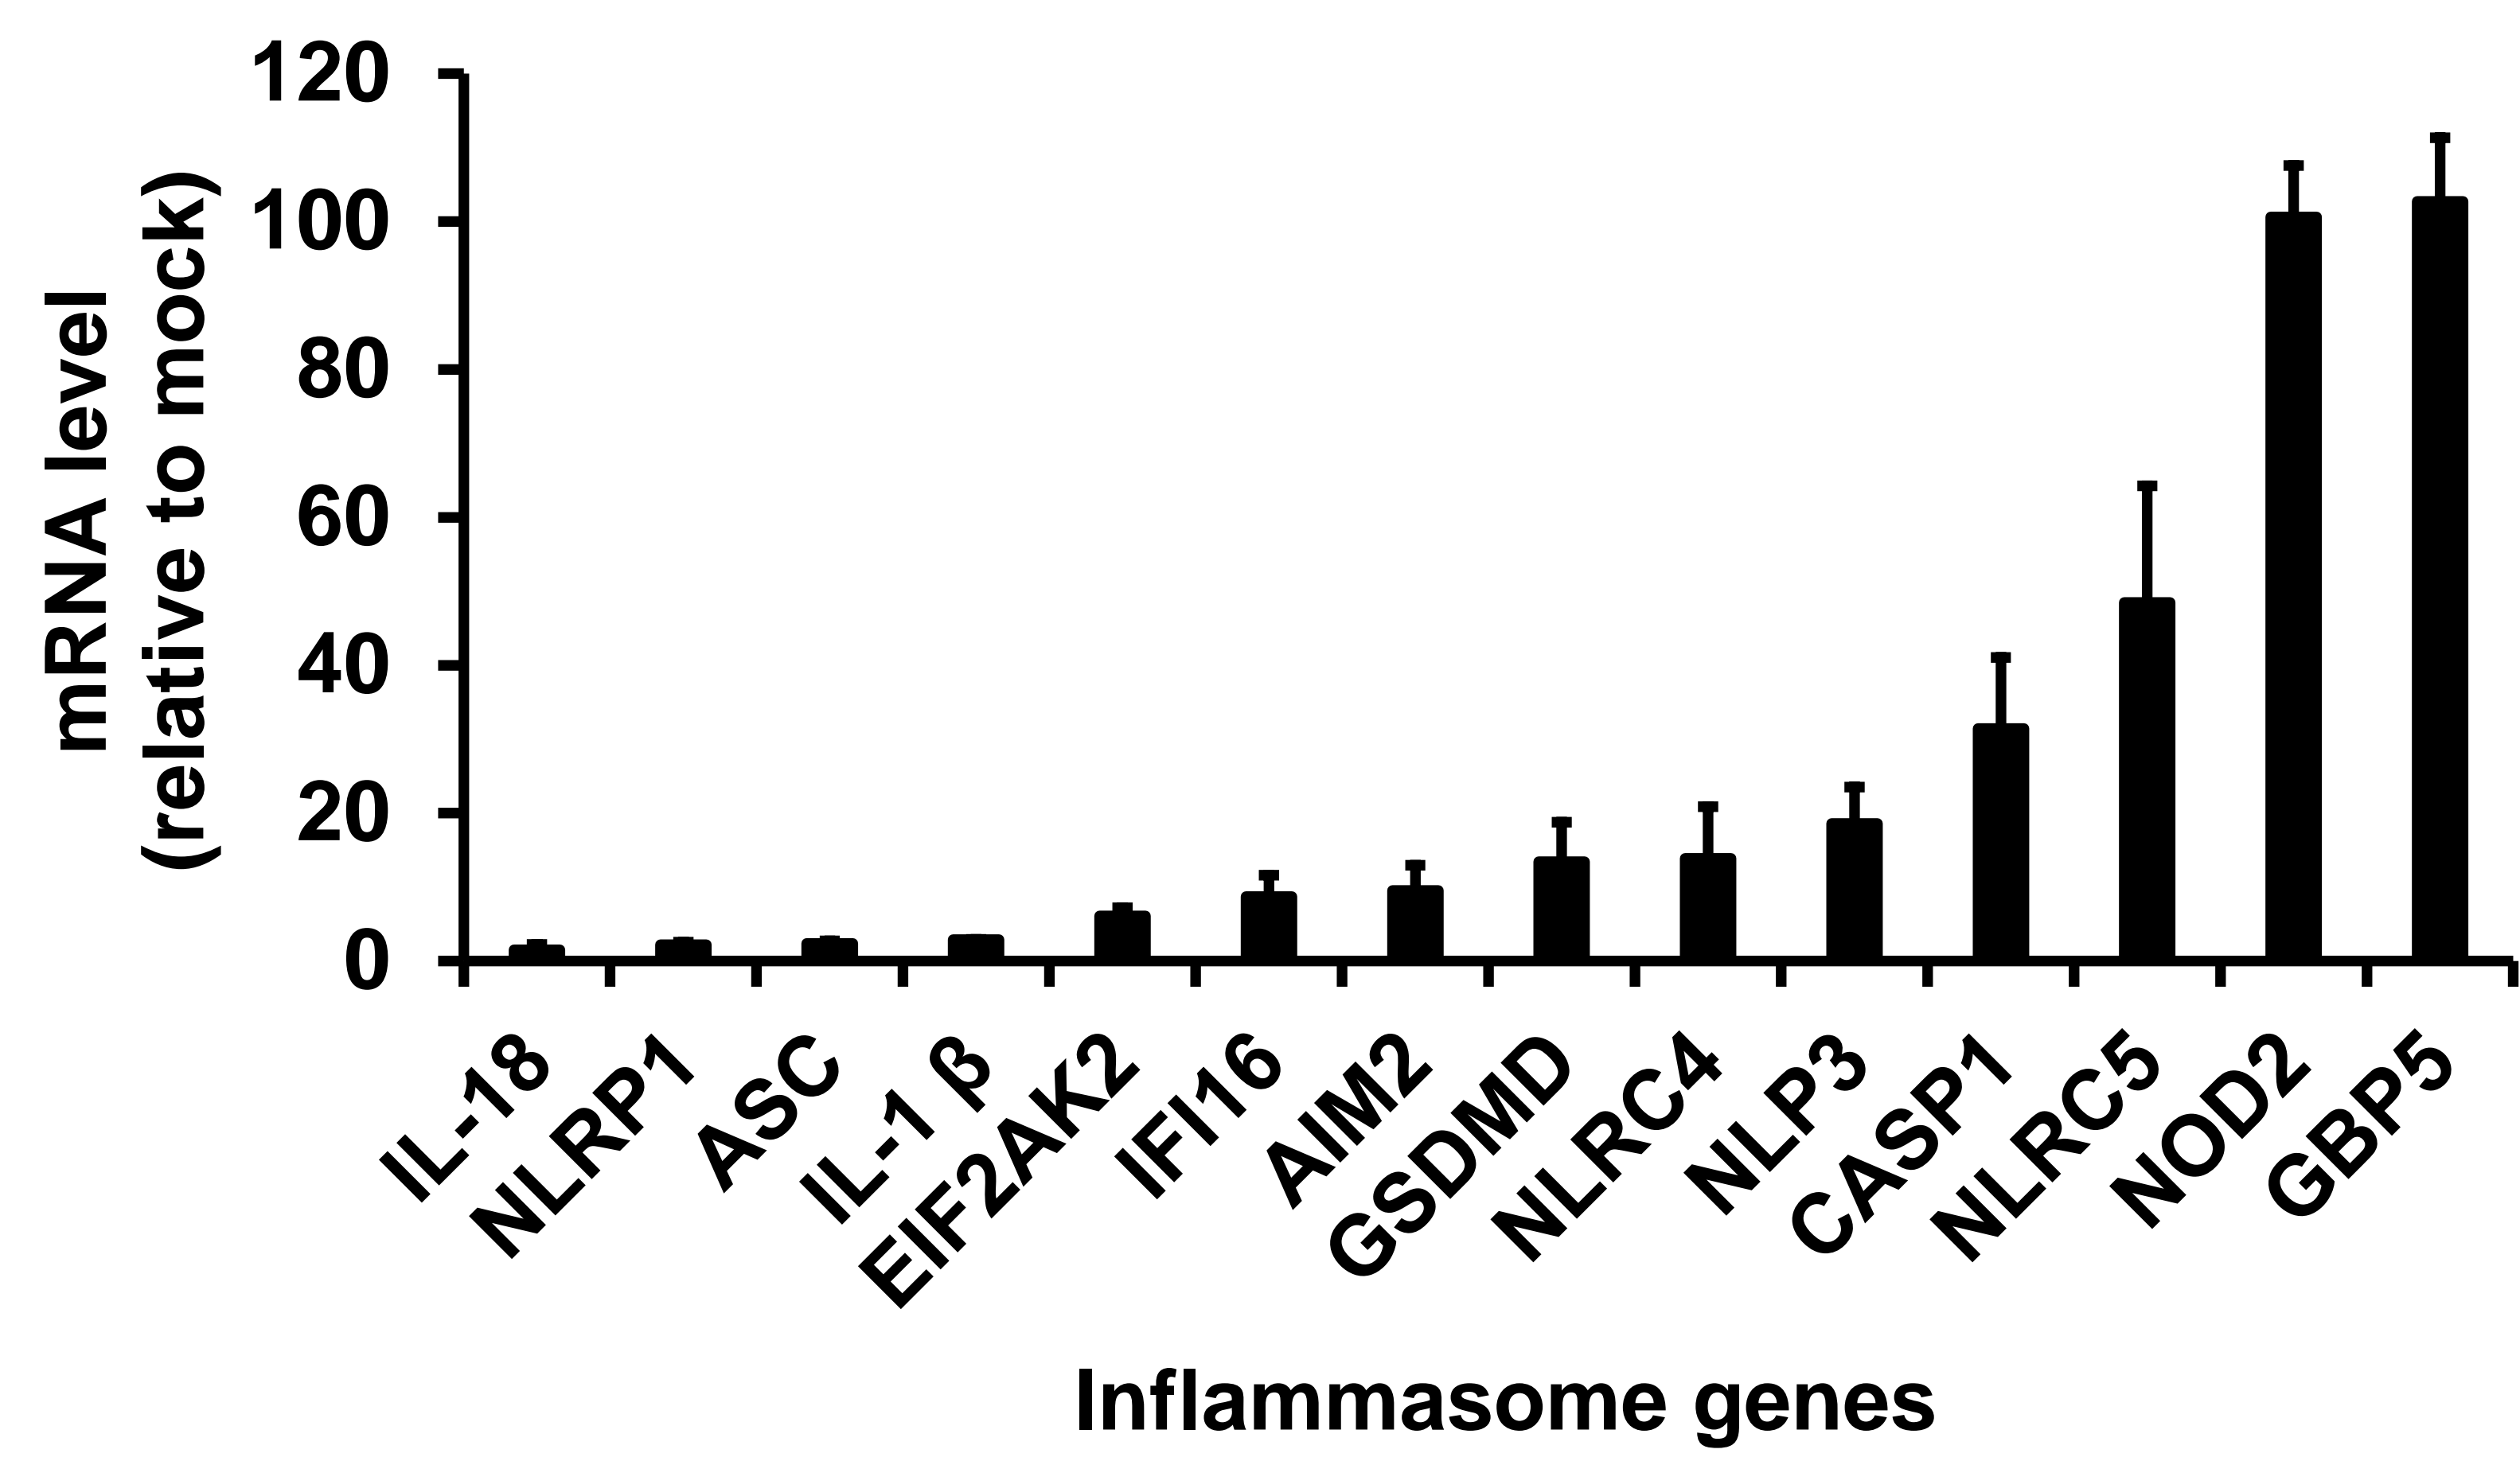**B**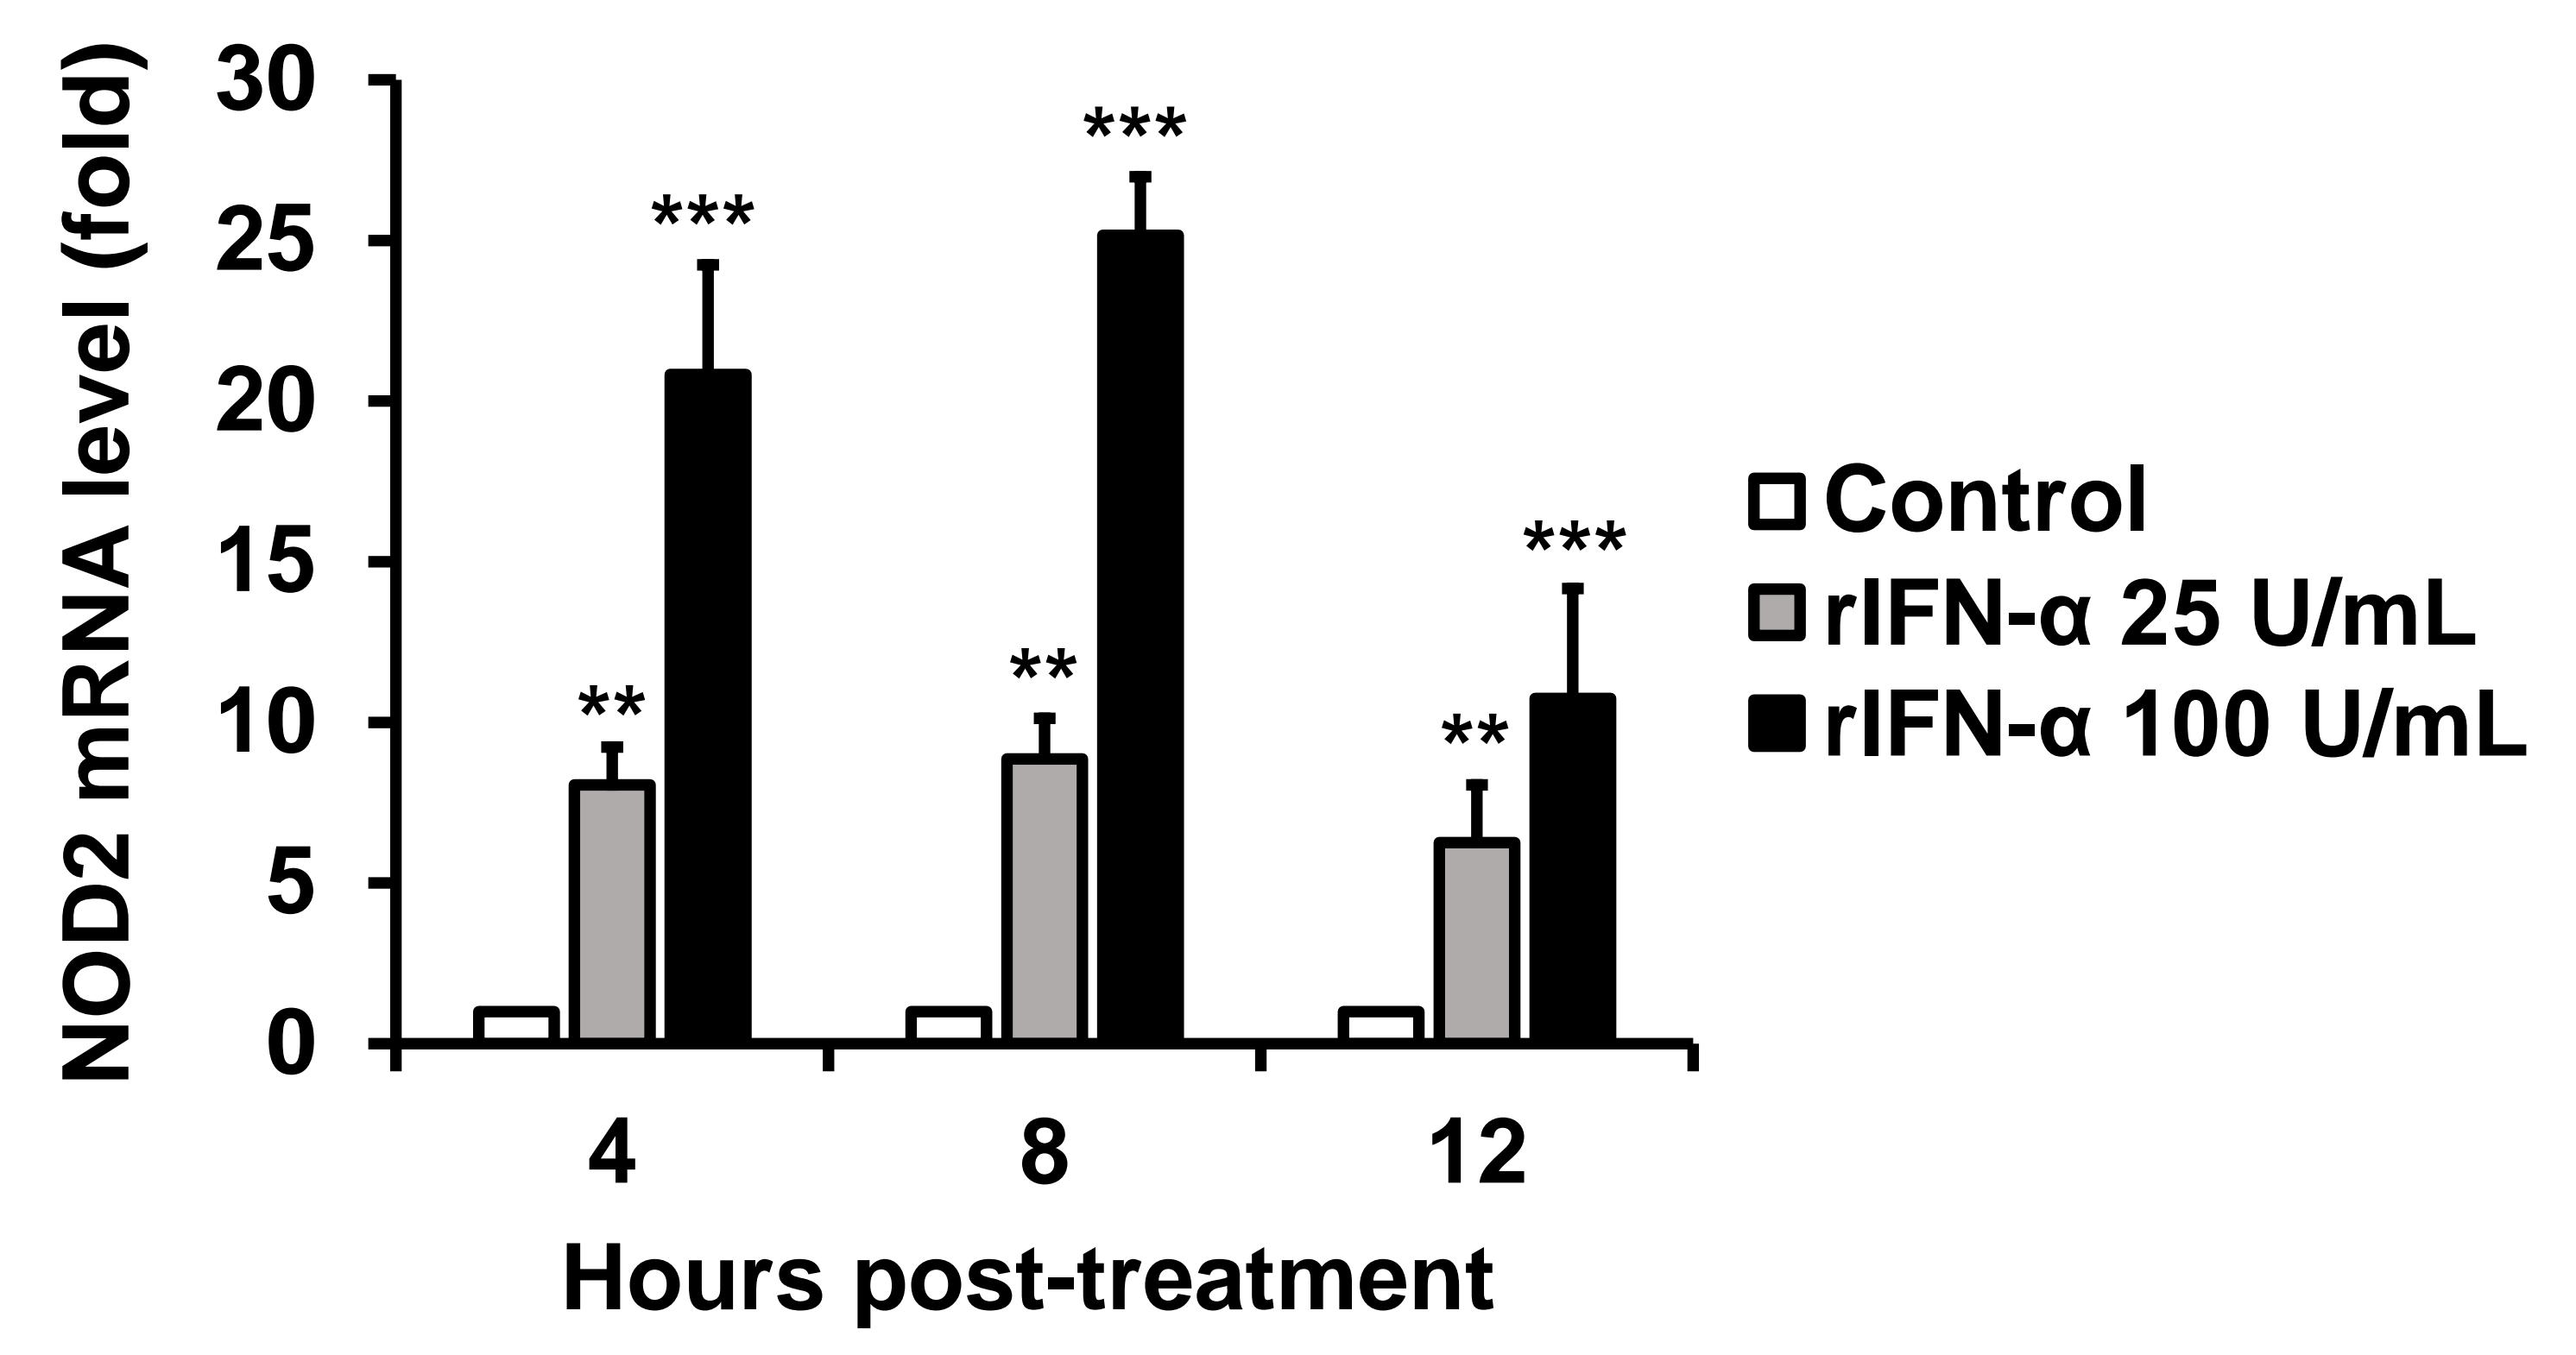**C**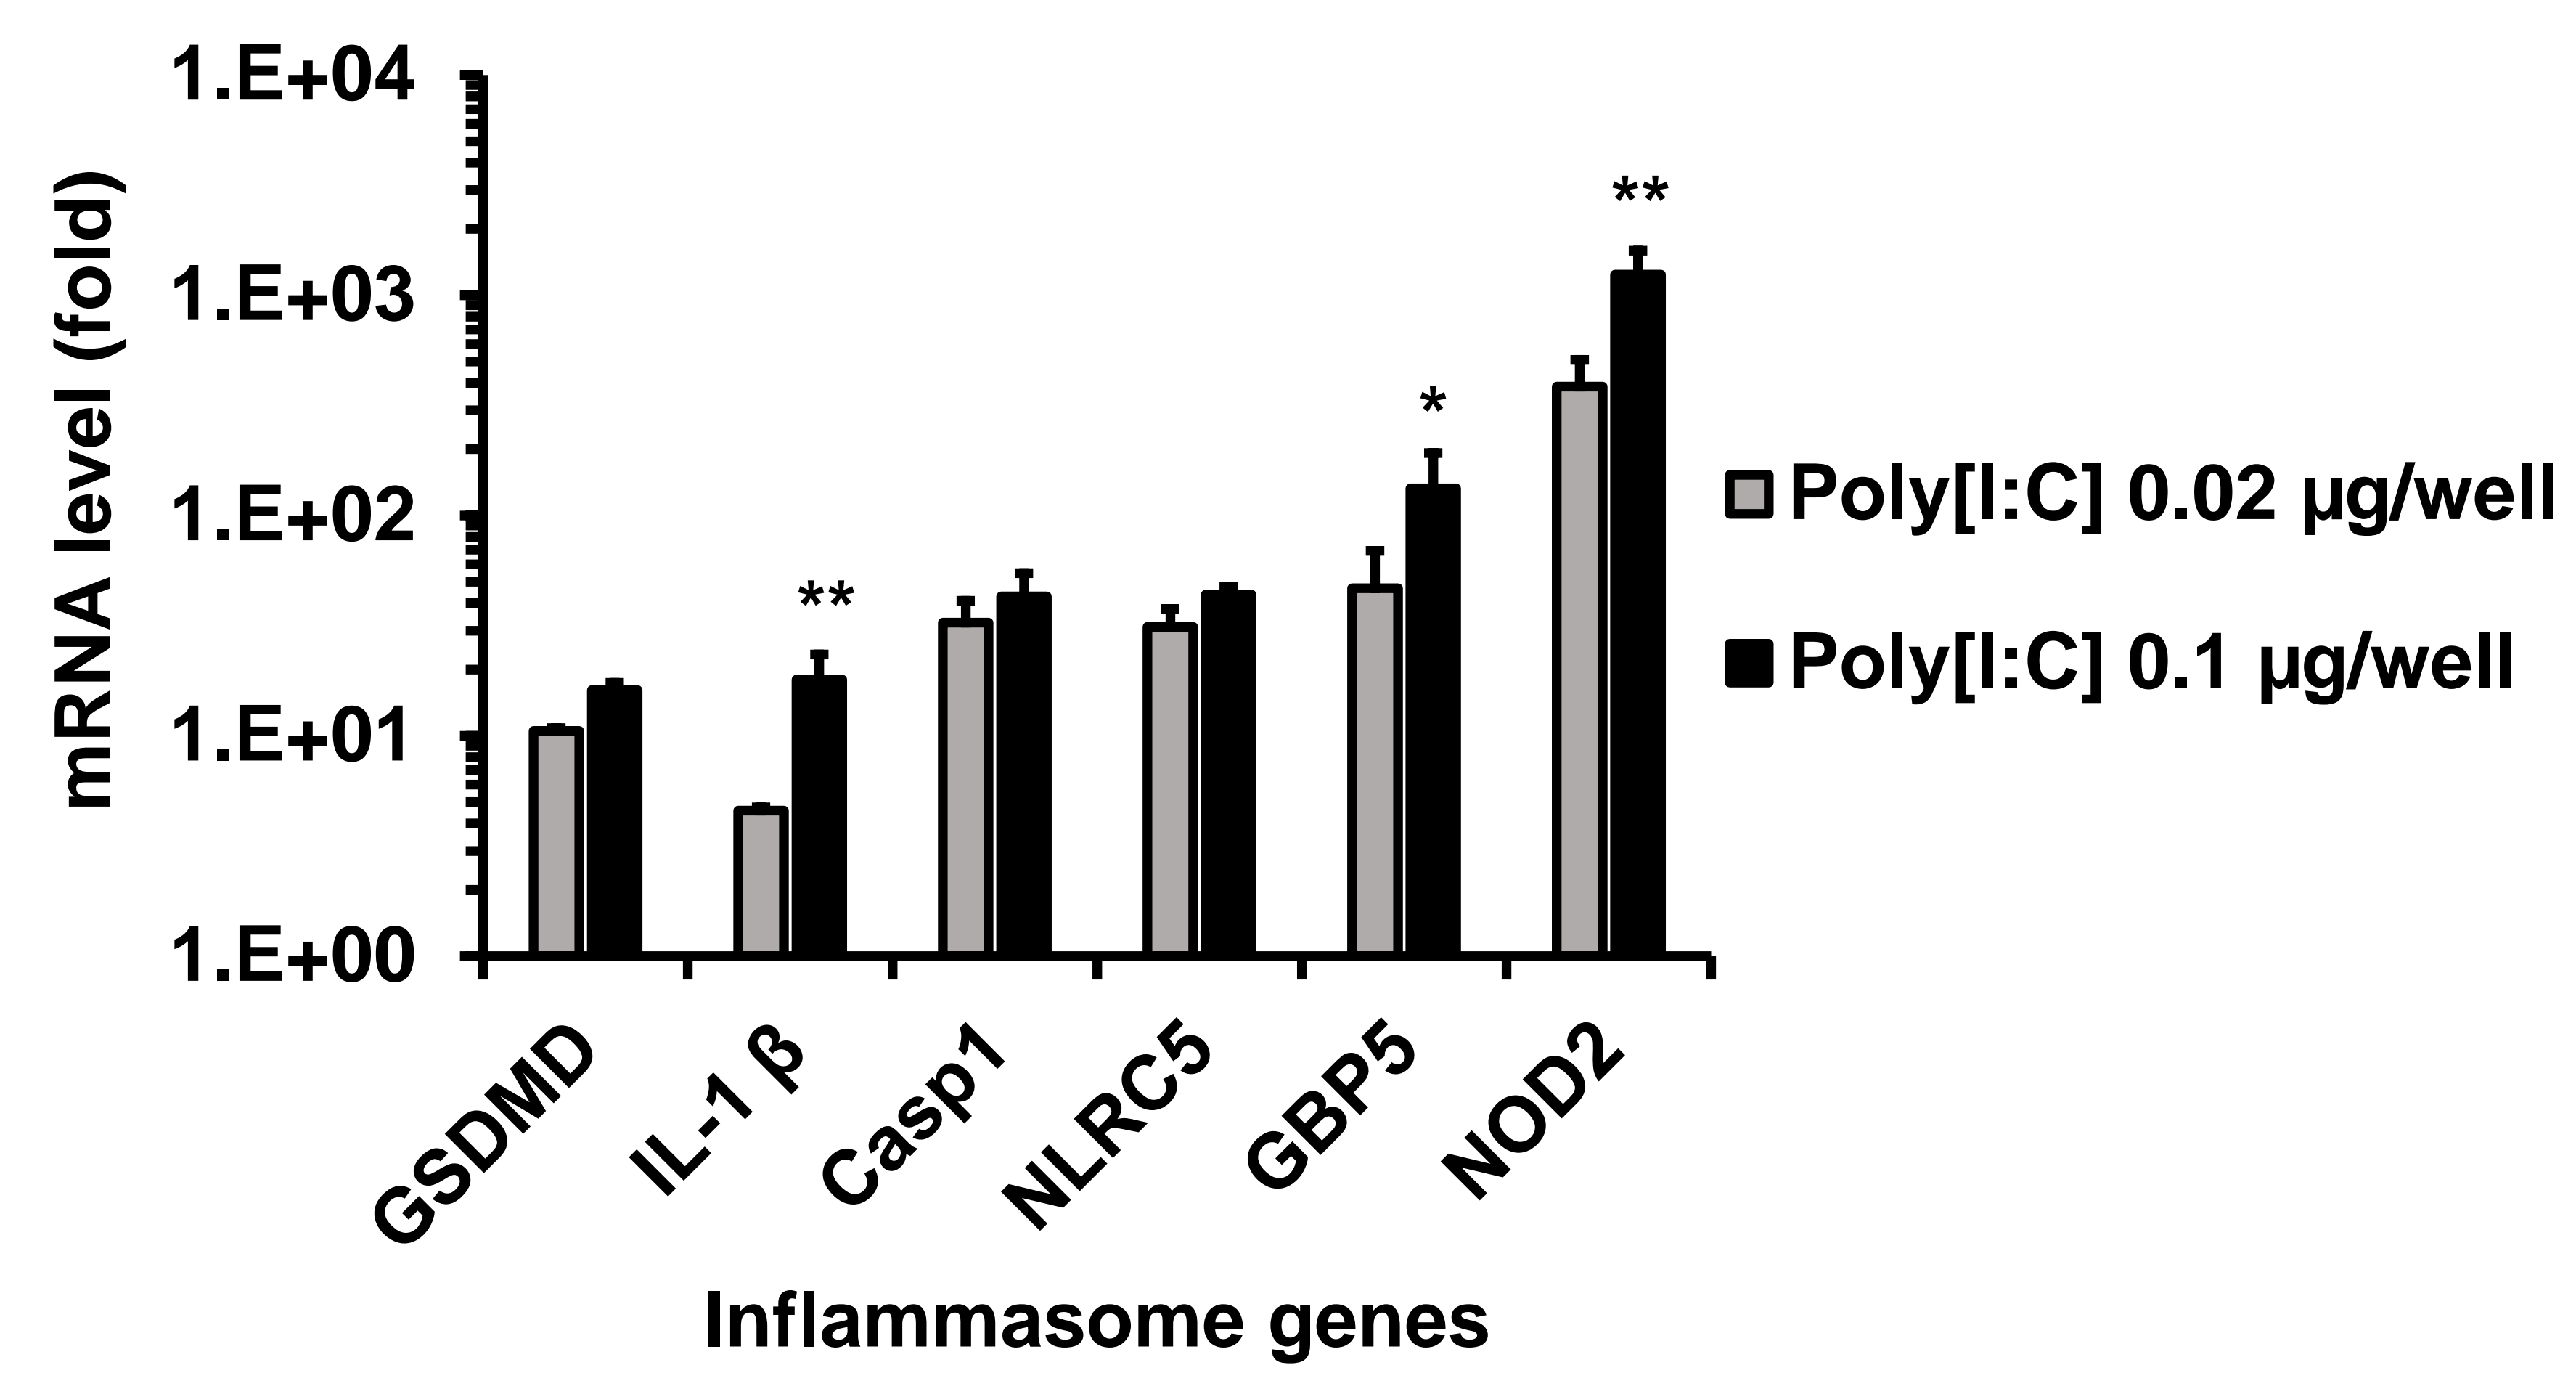

**FIG 2**

**A**

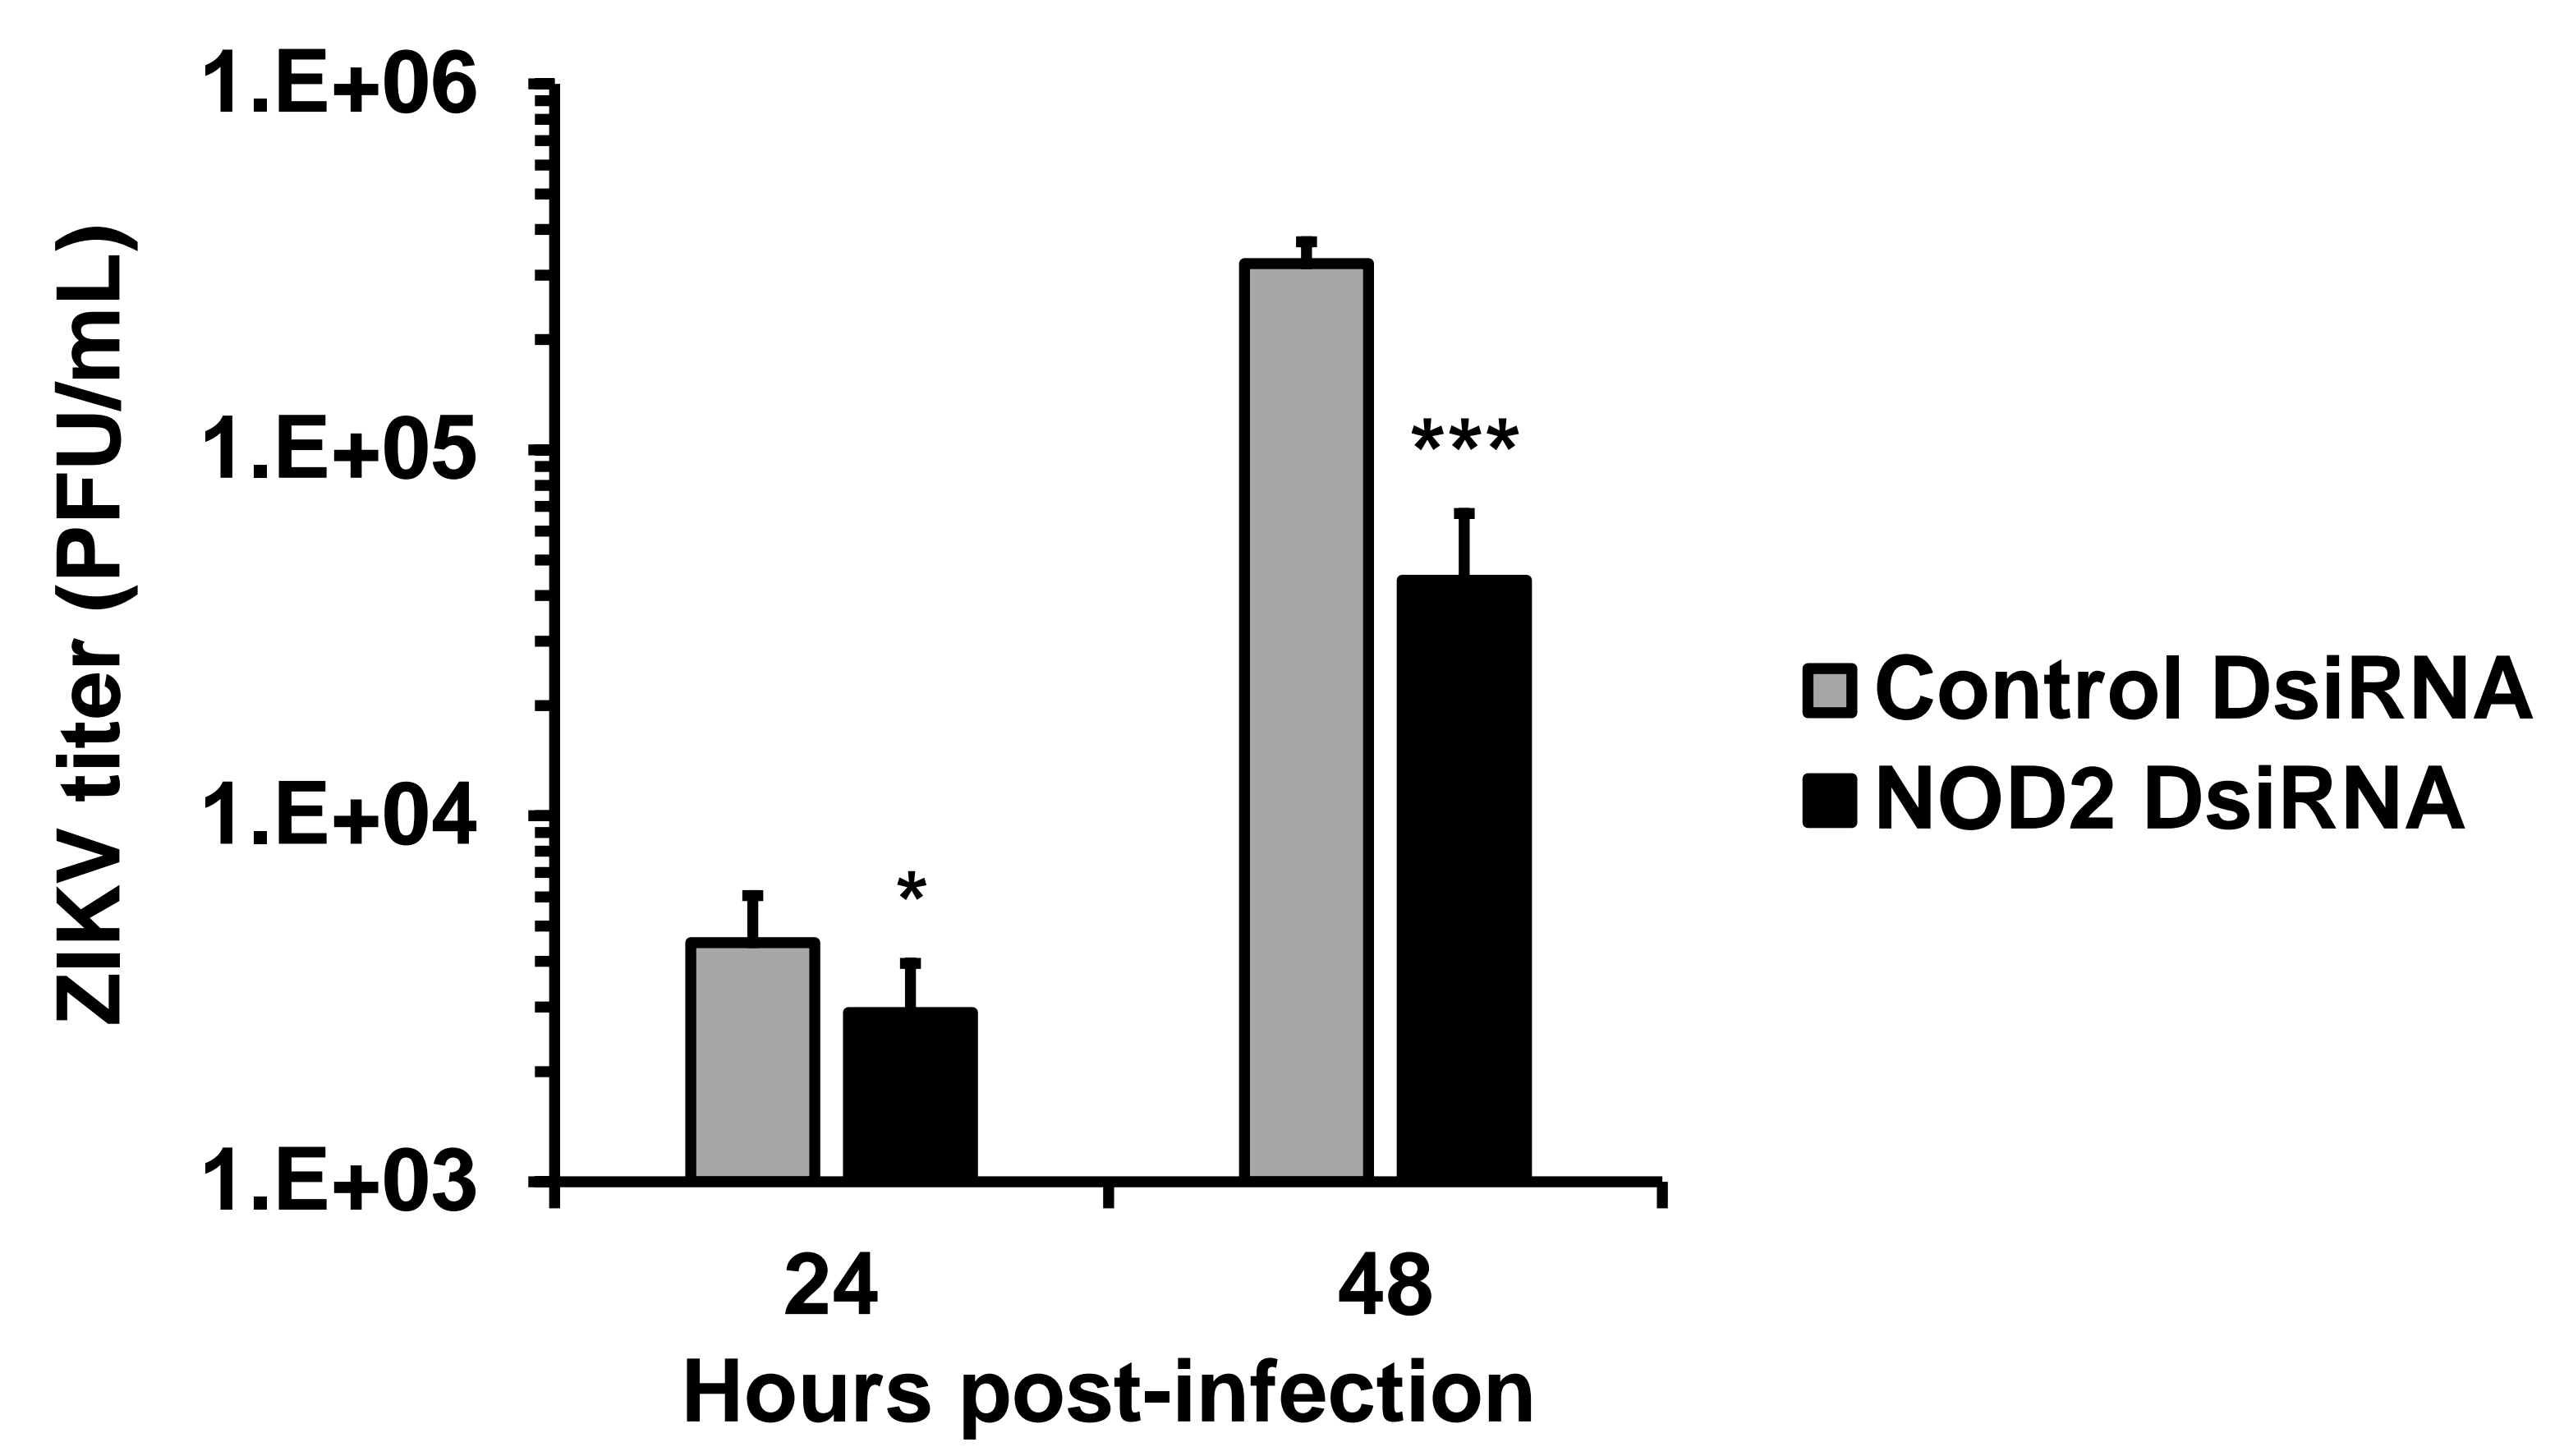

**B**

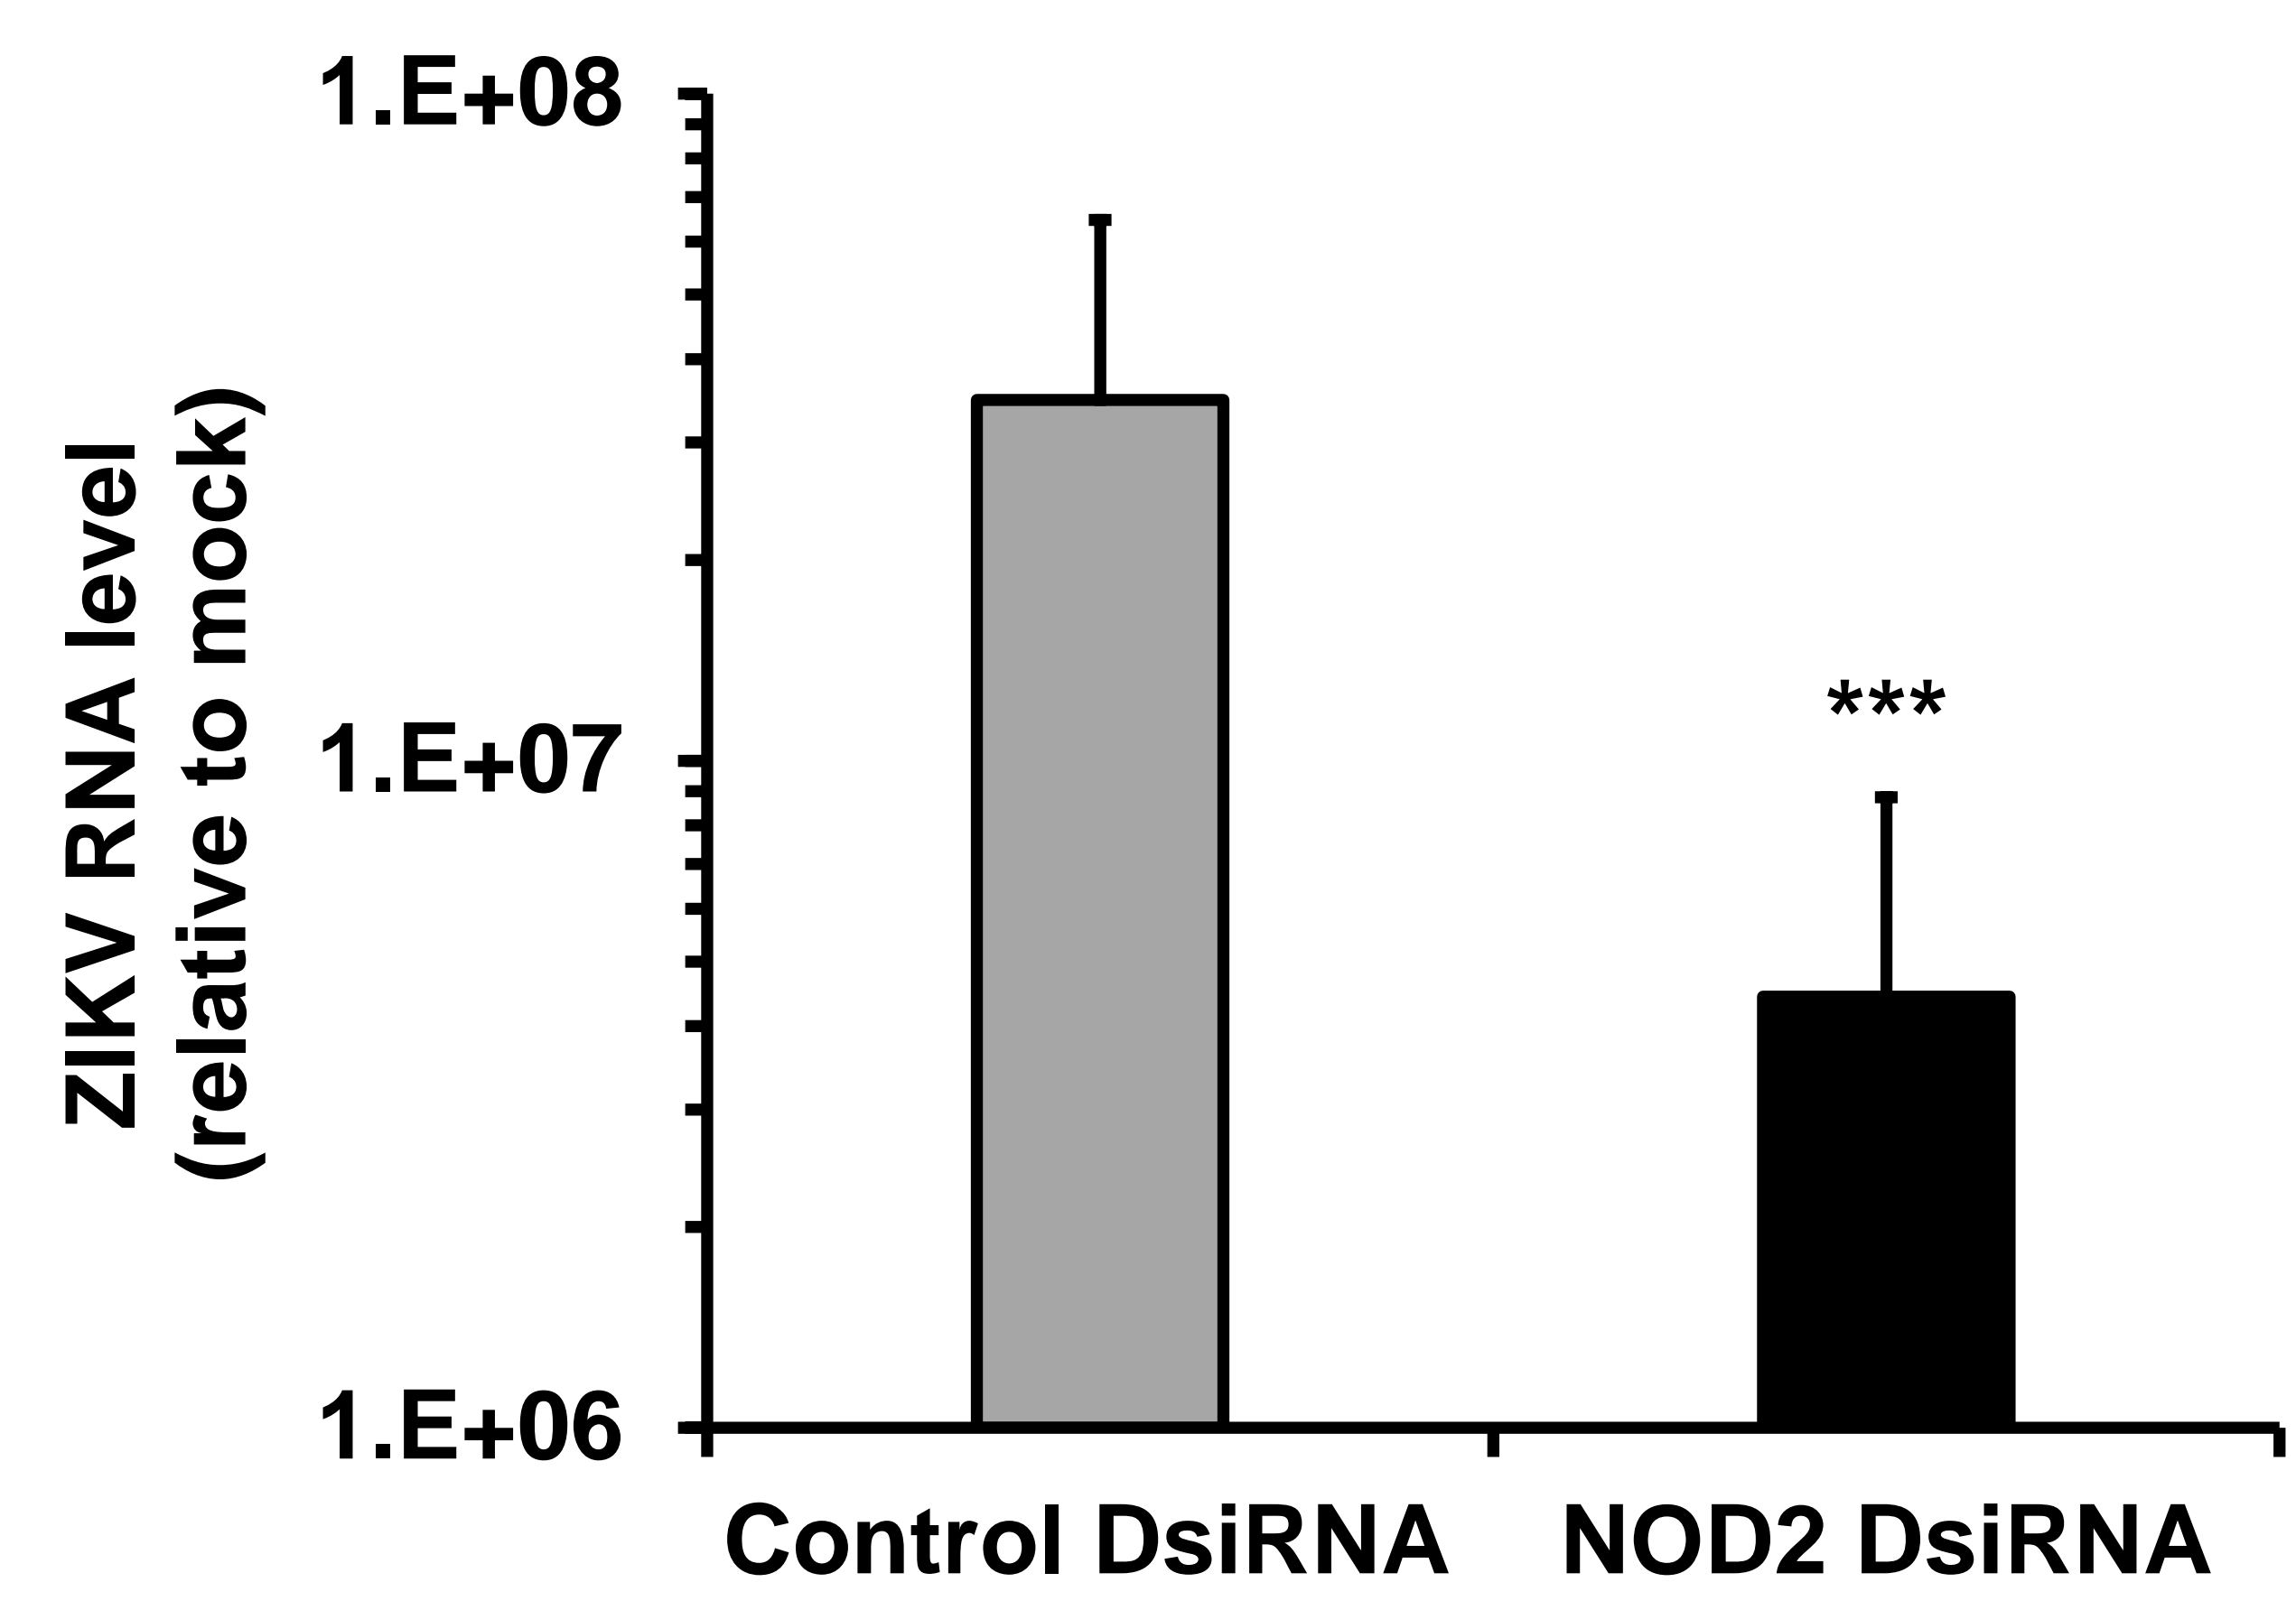

**C**

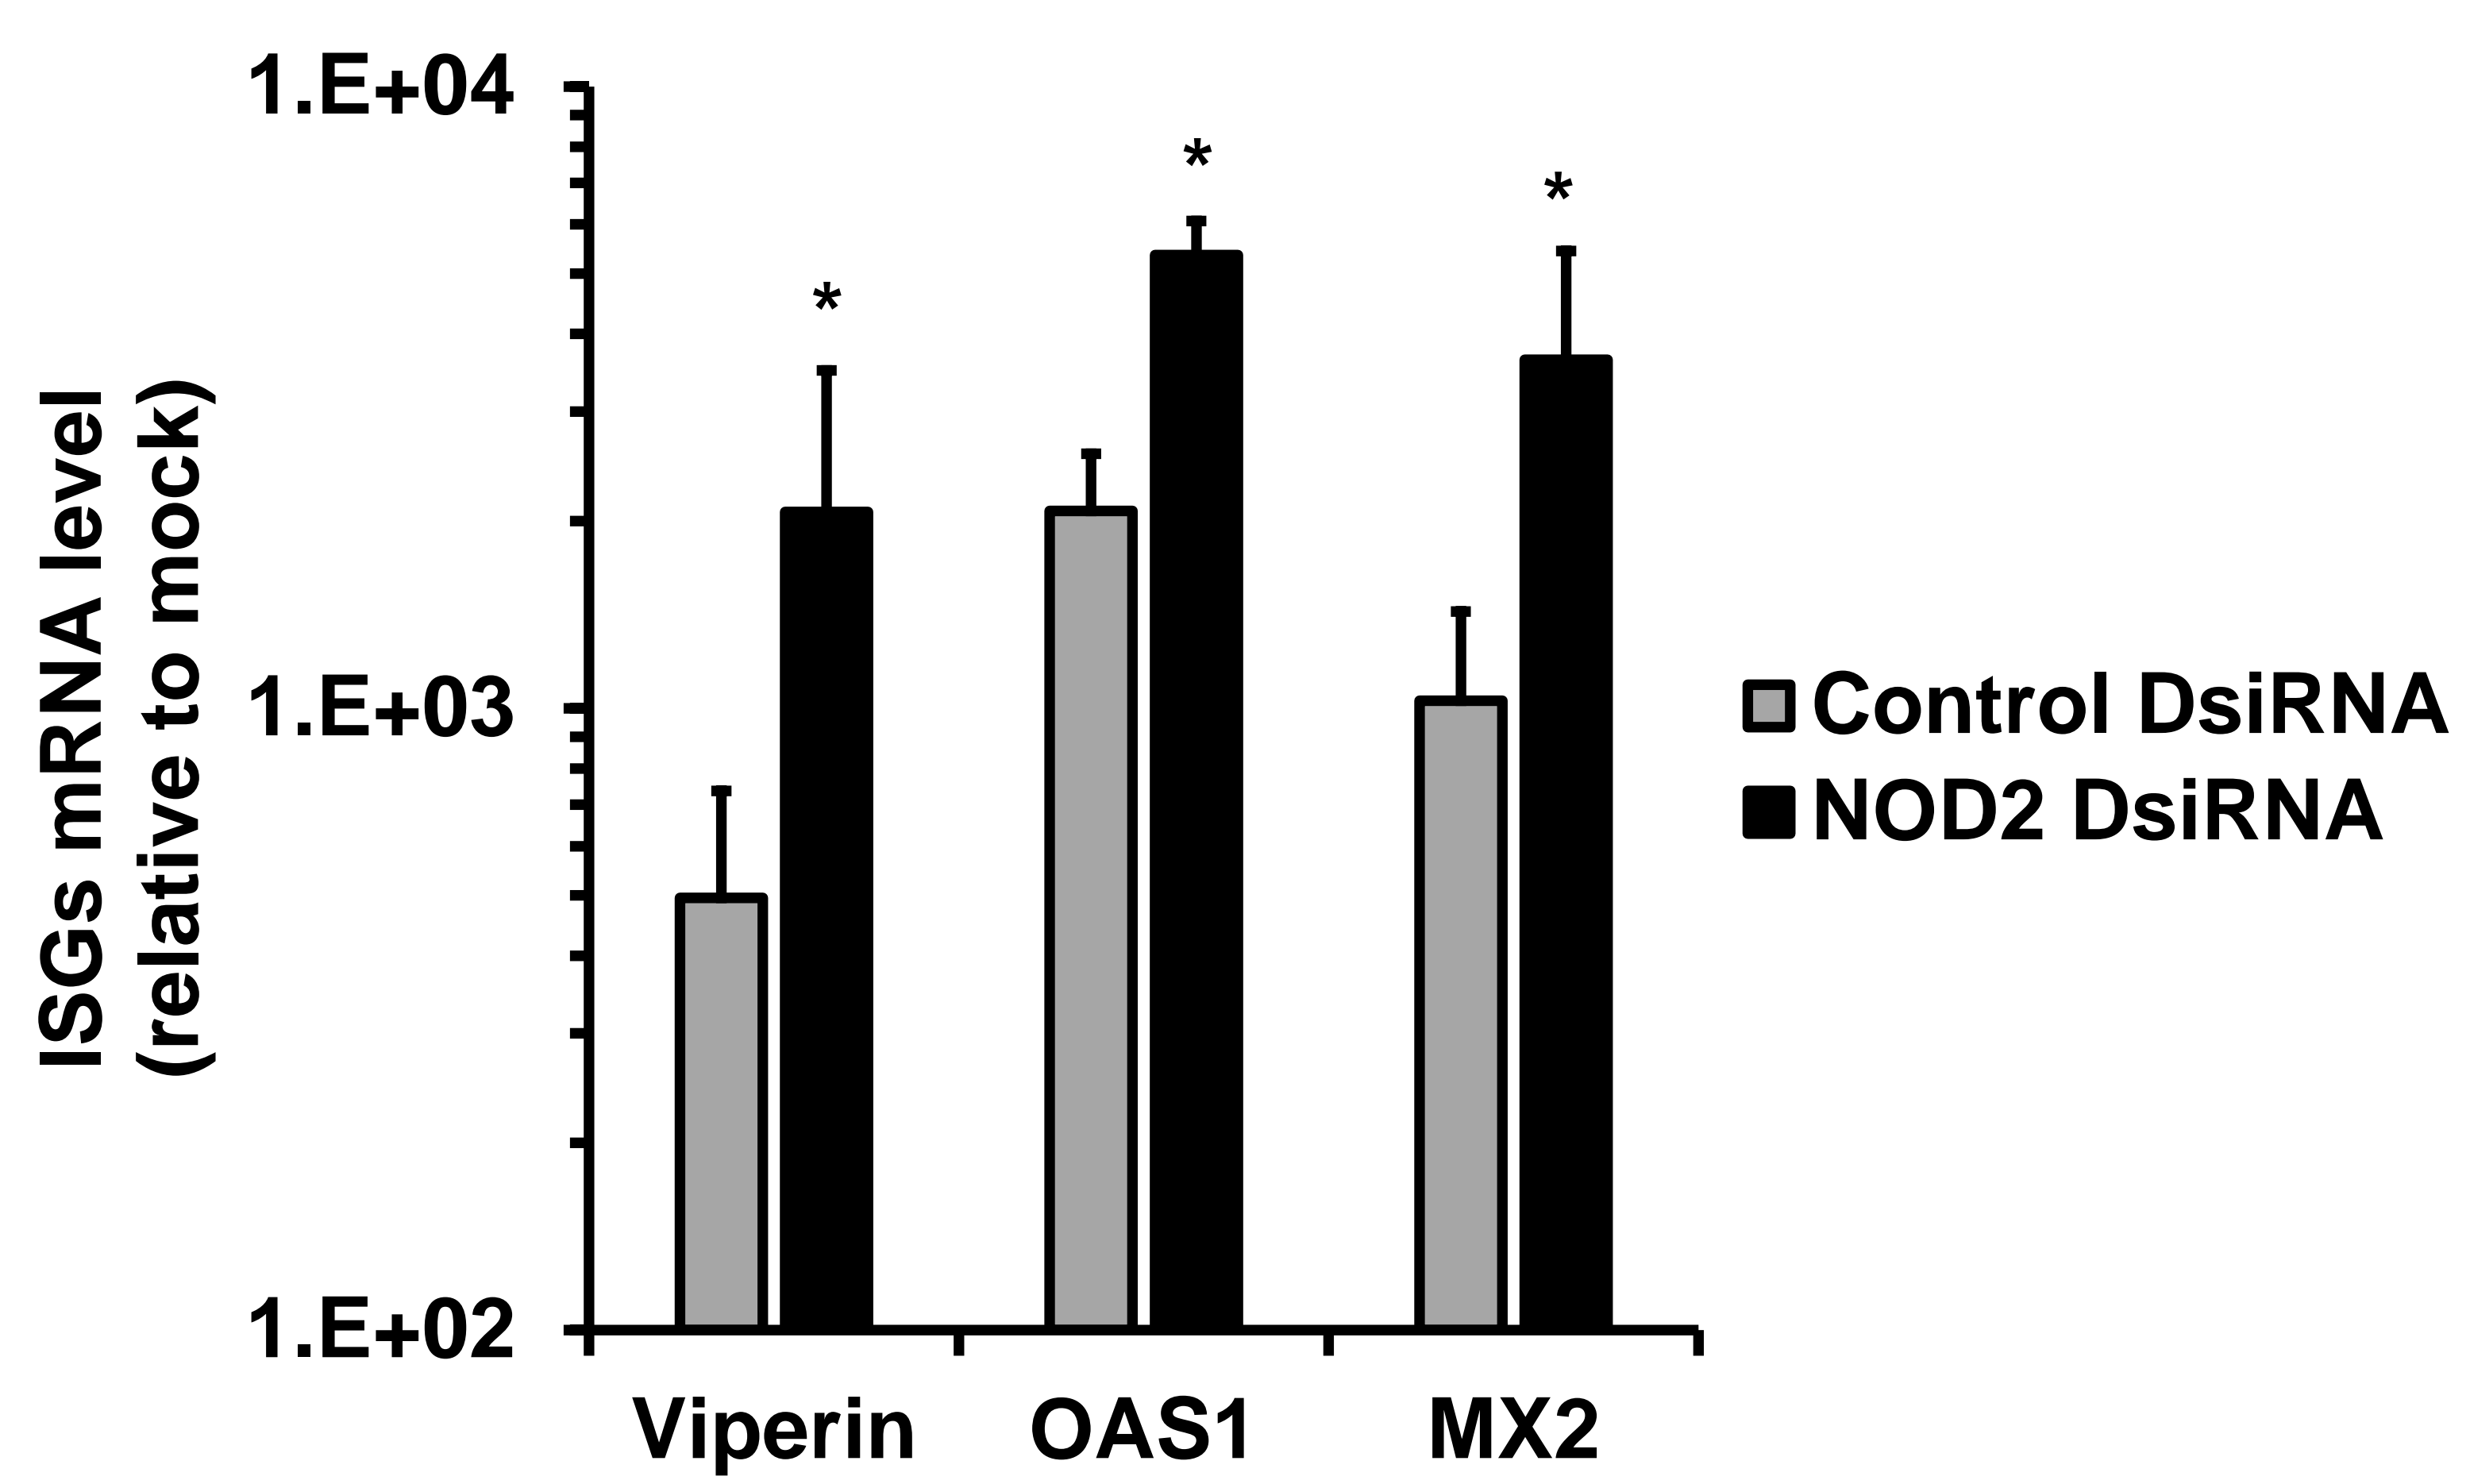

**D**

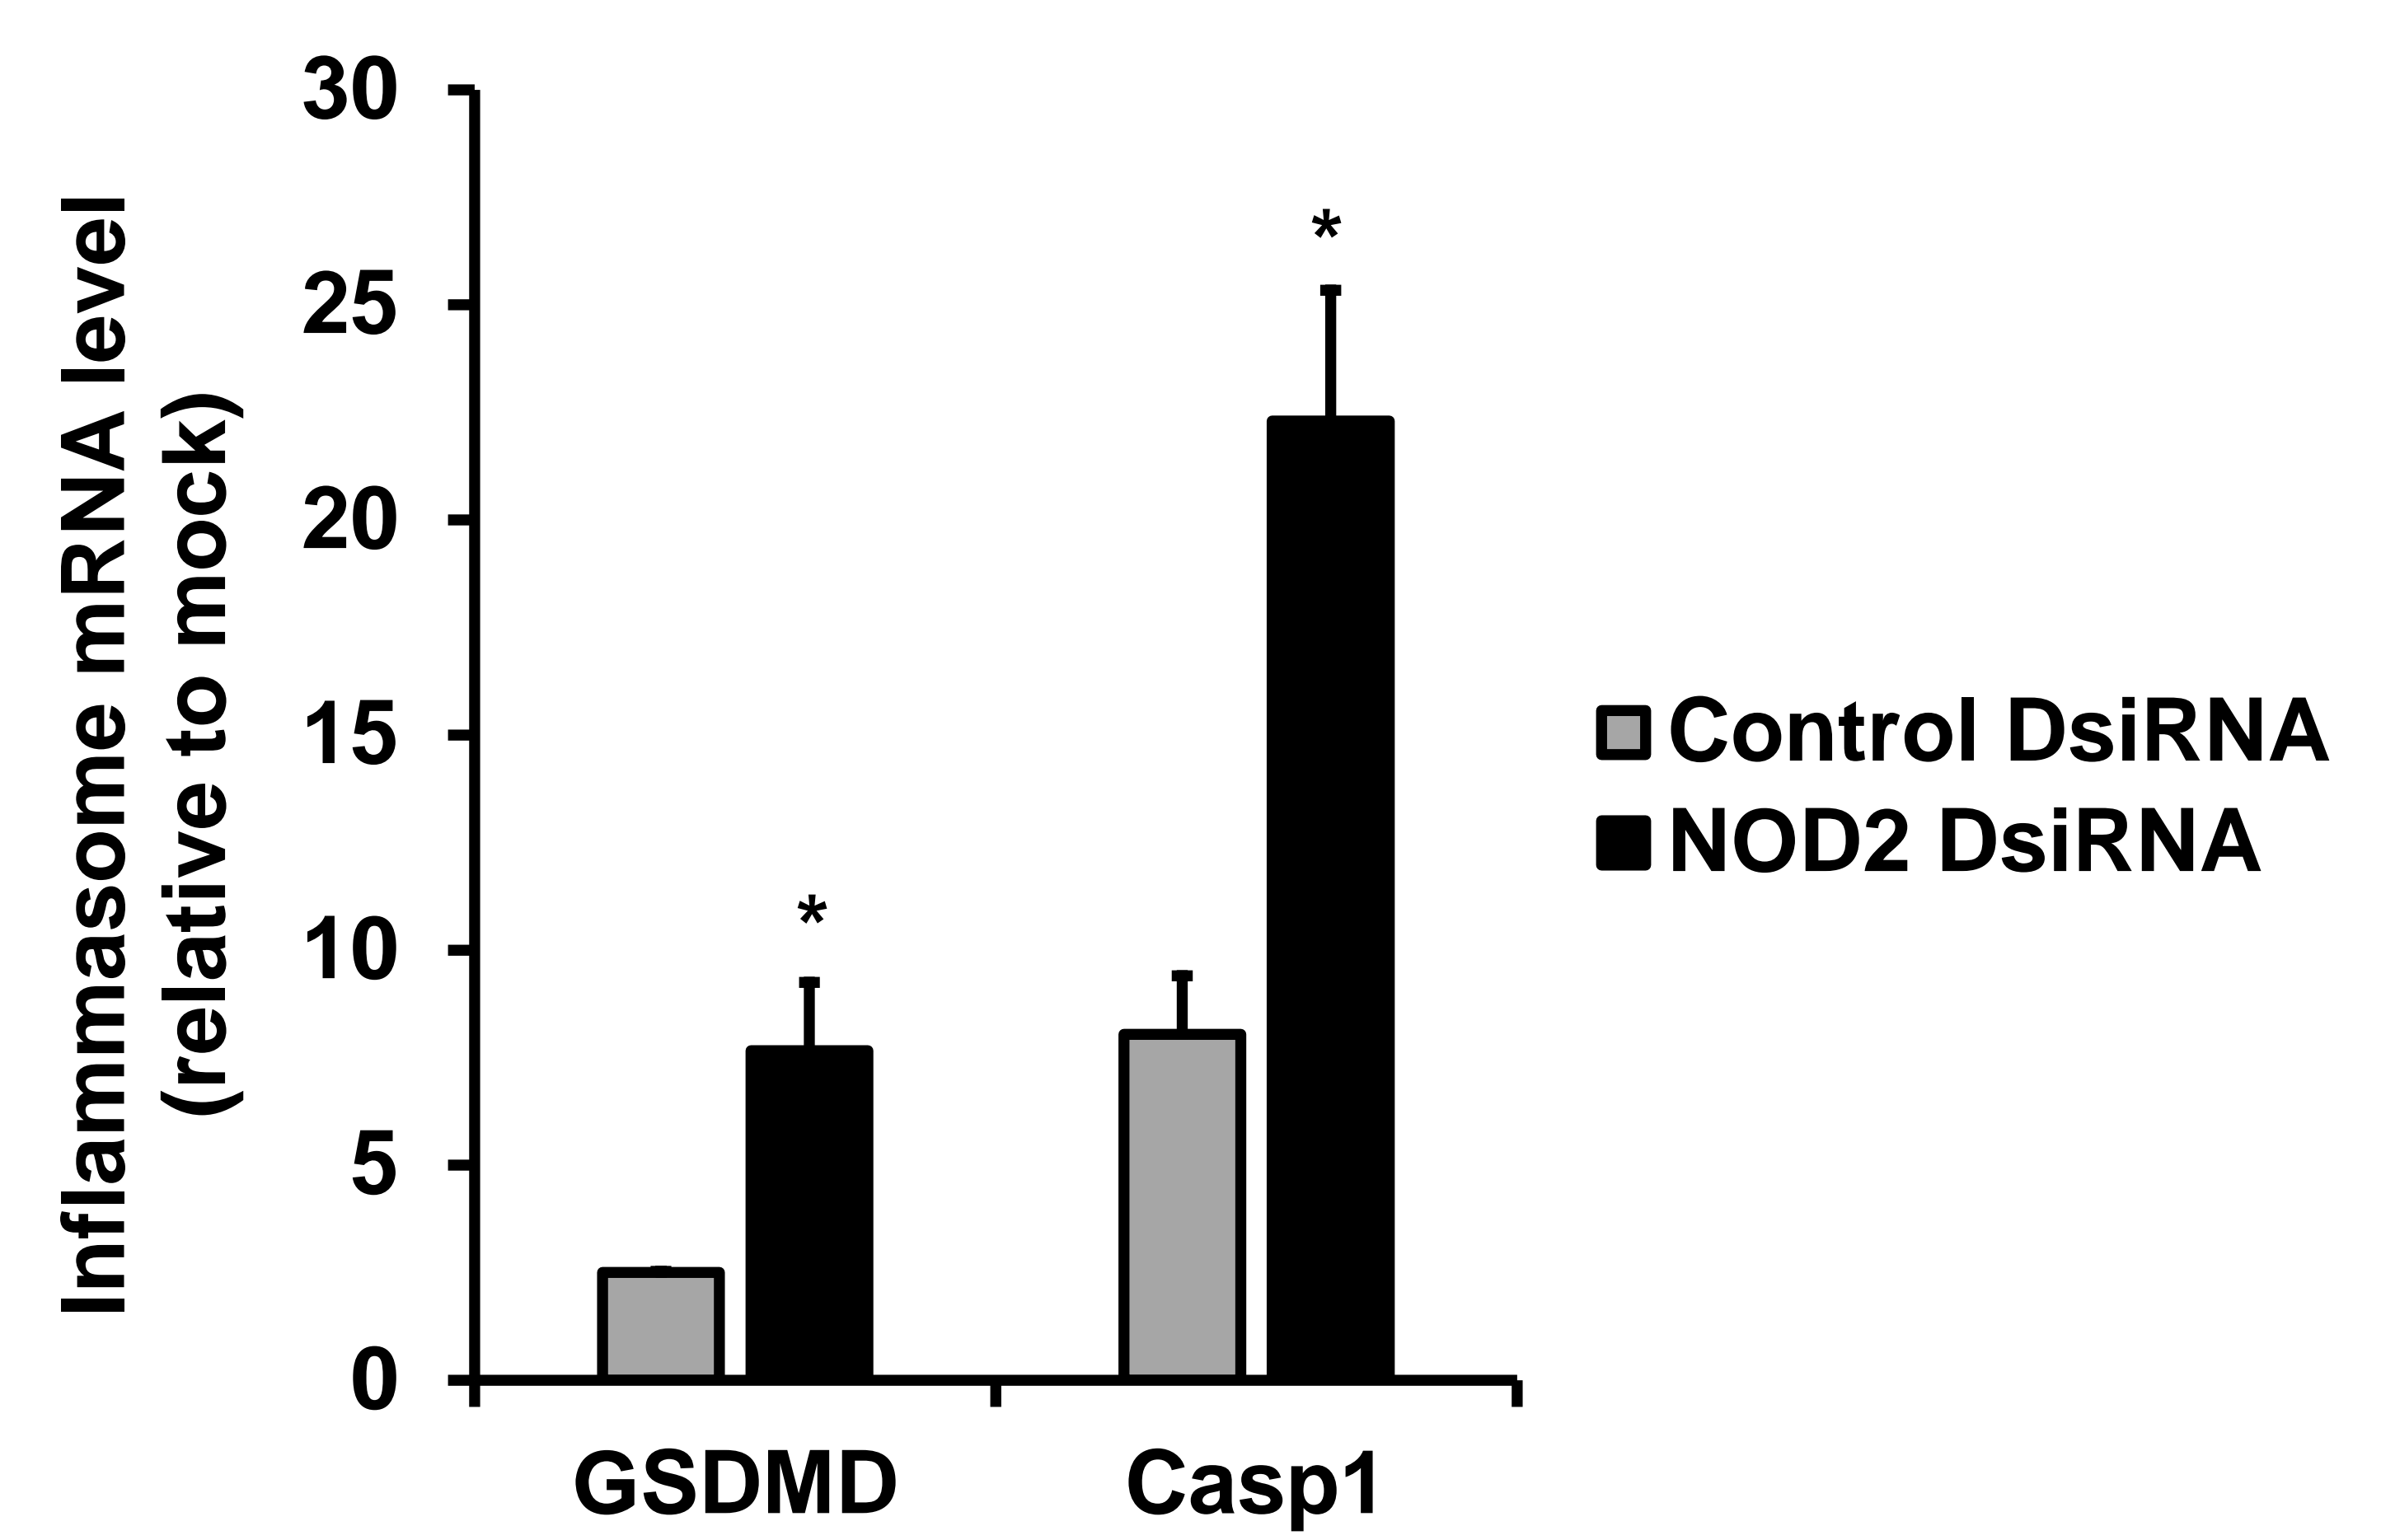

**FIG 3****A**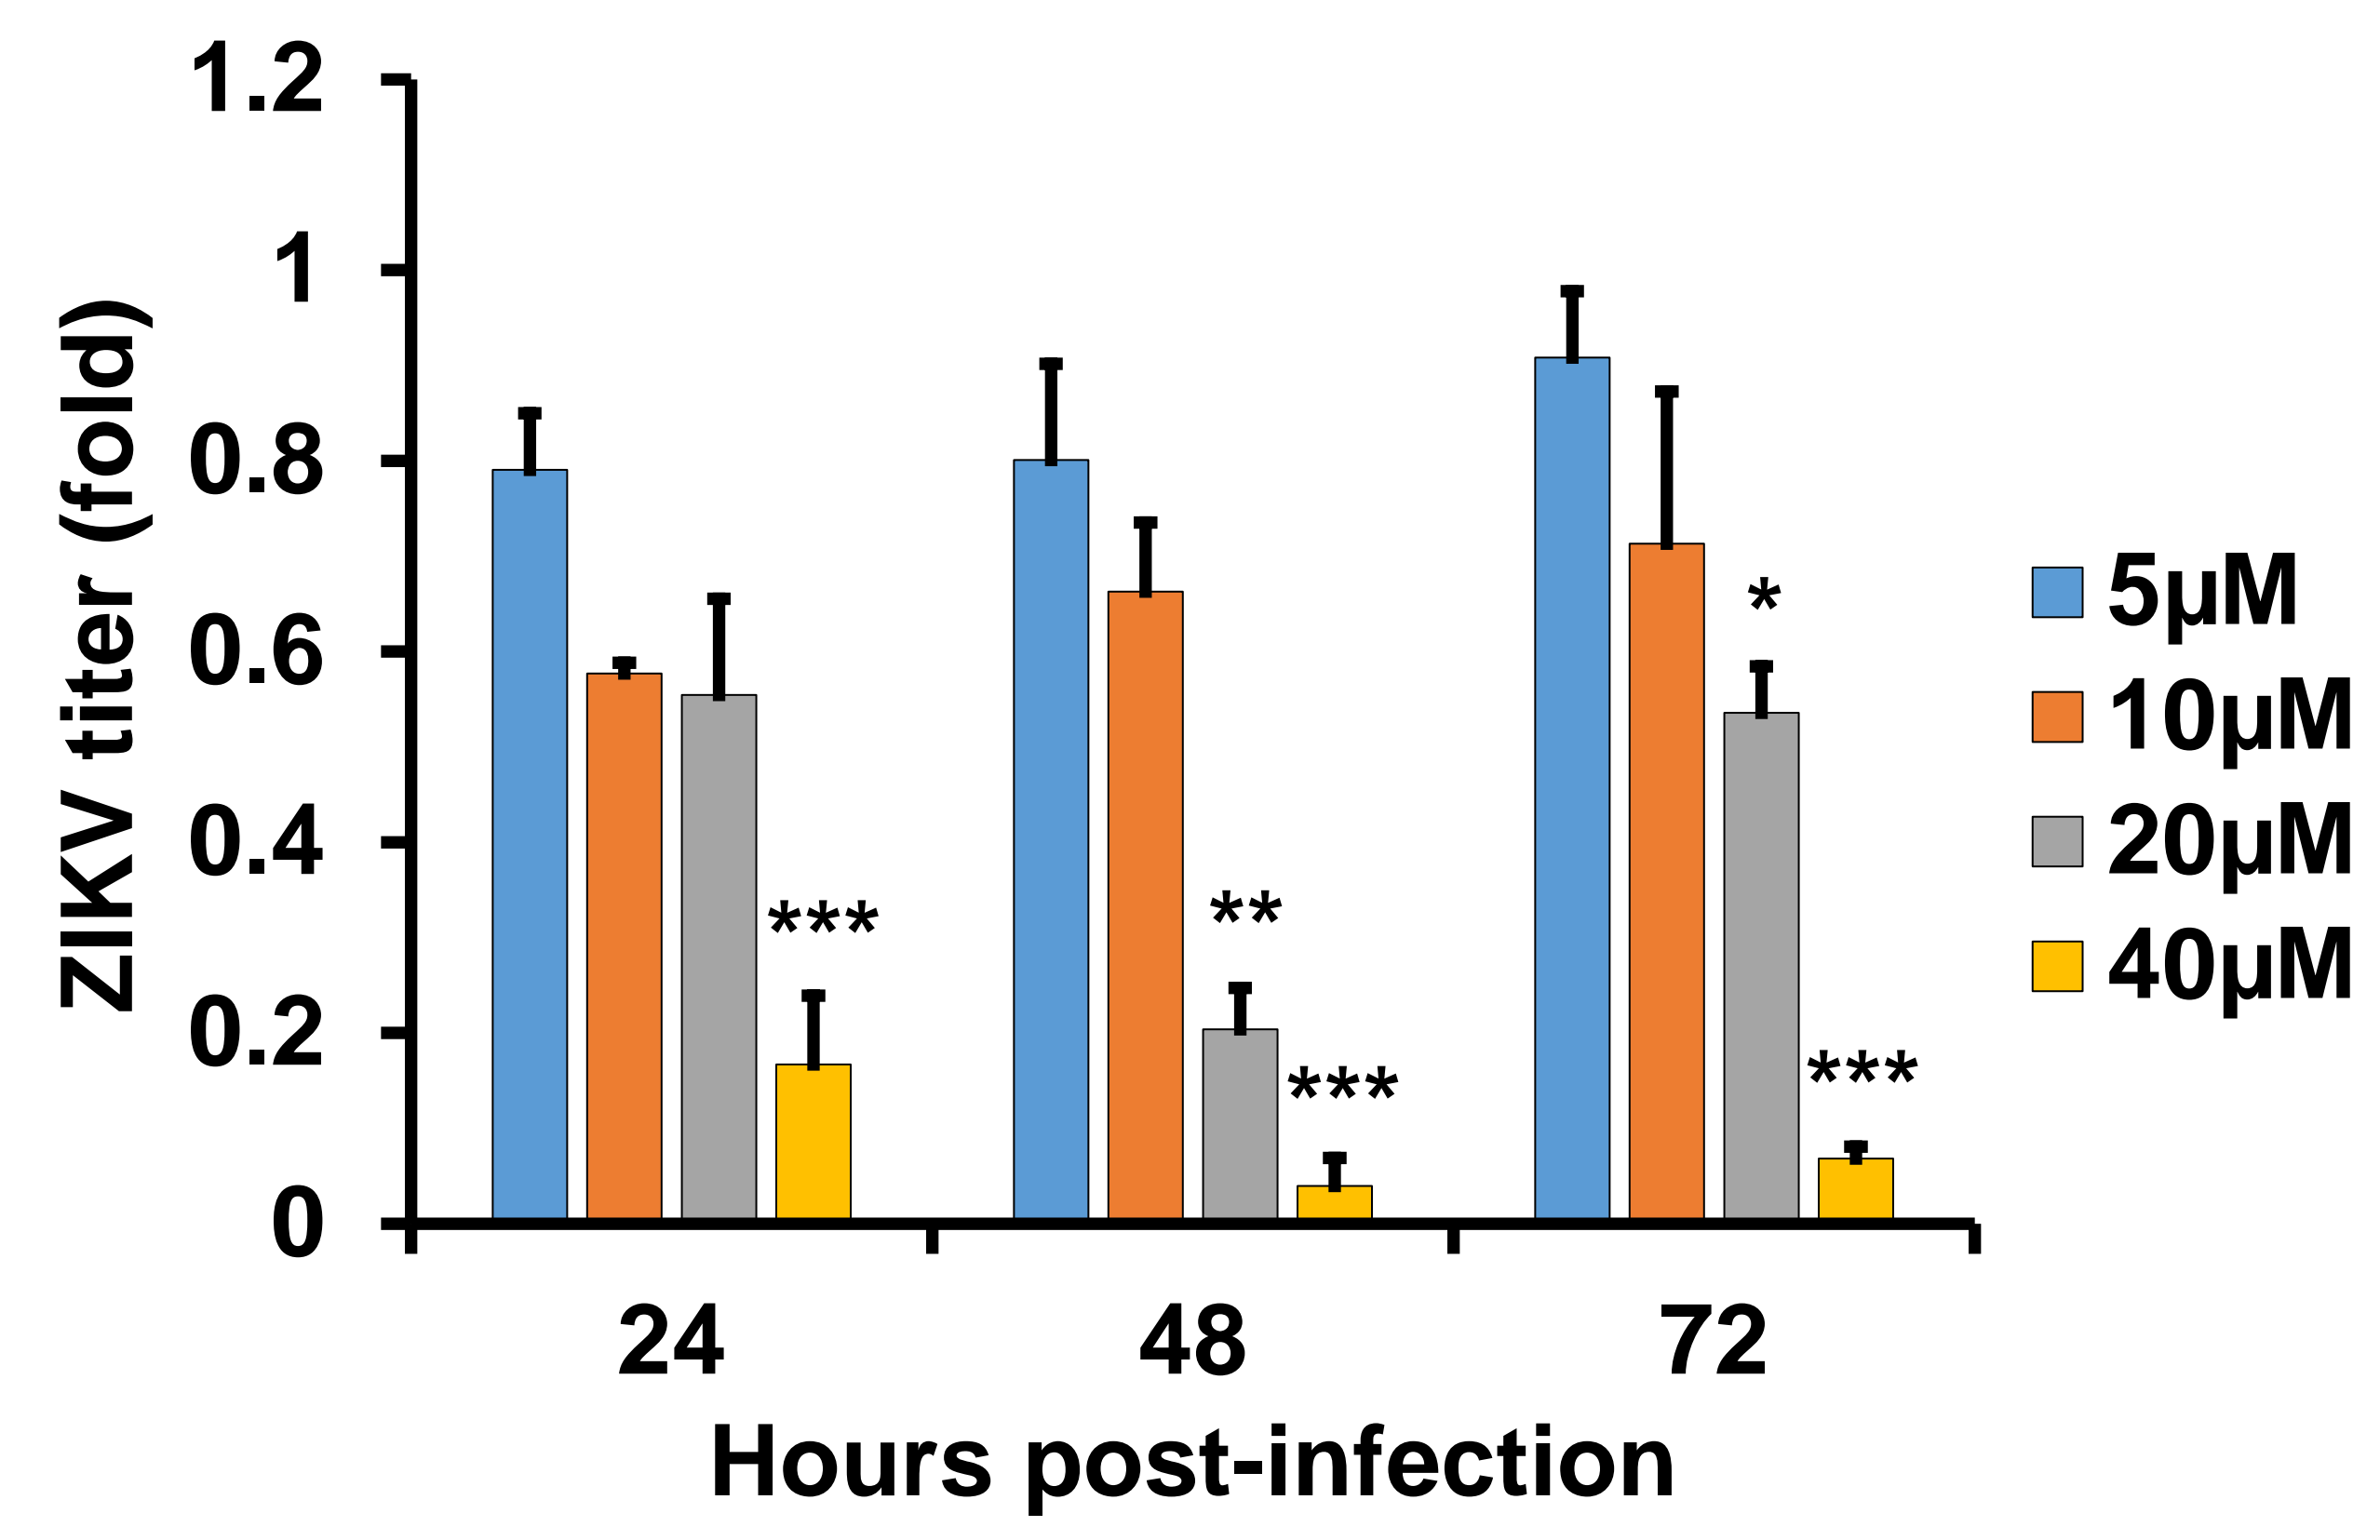**B**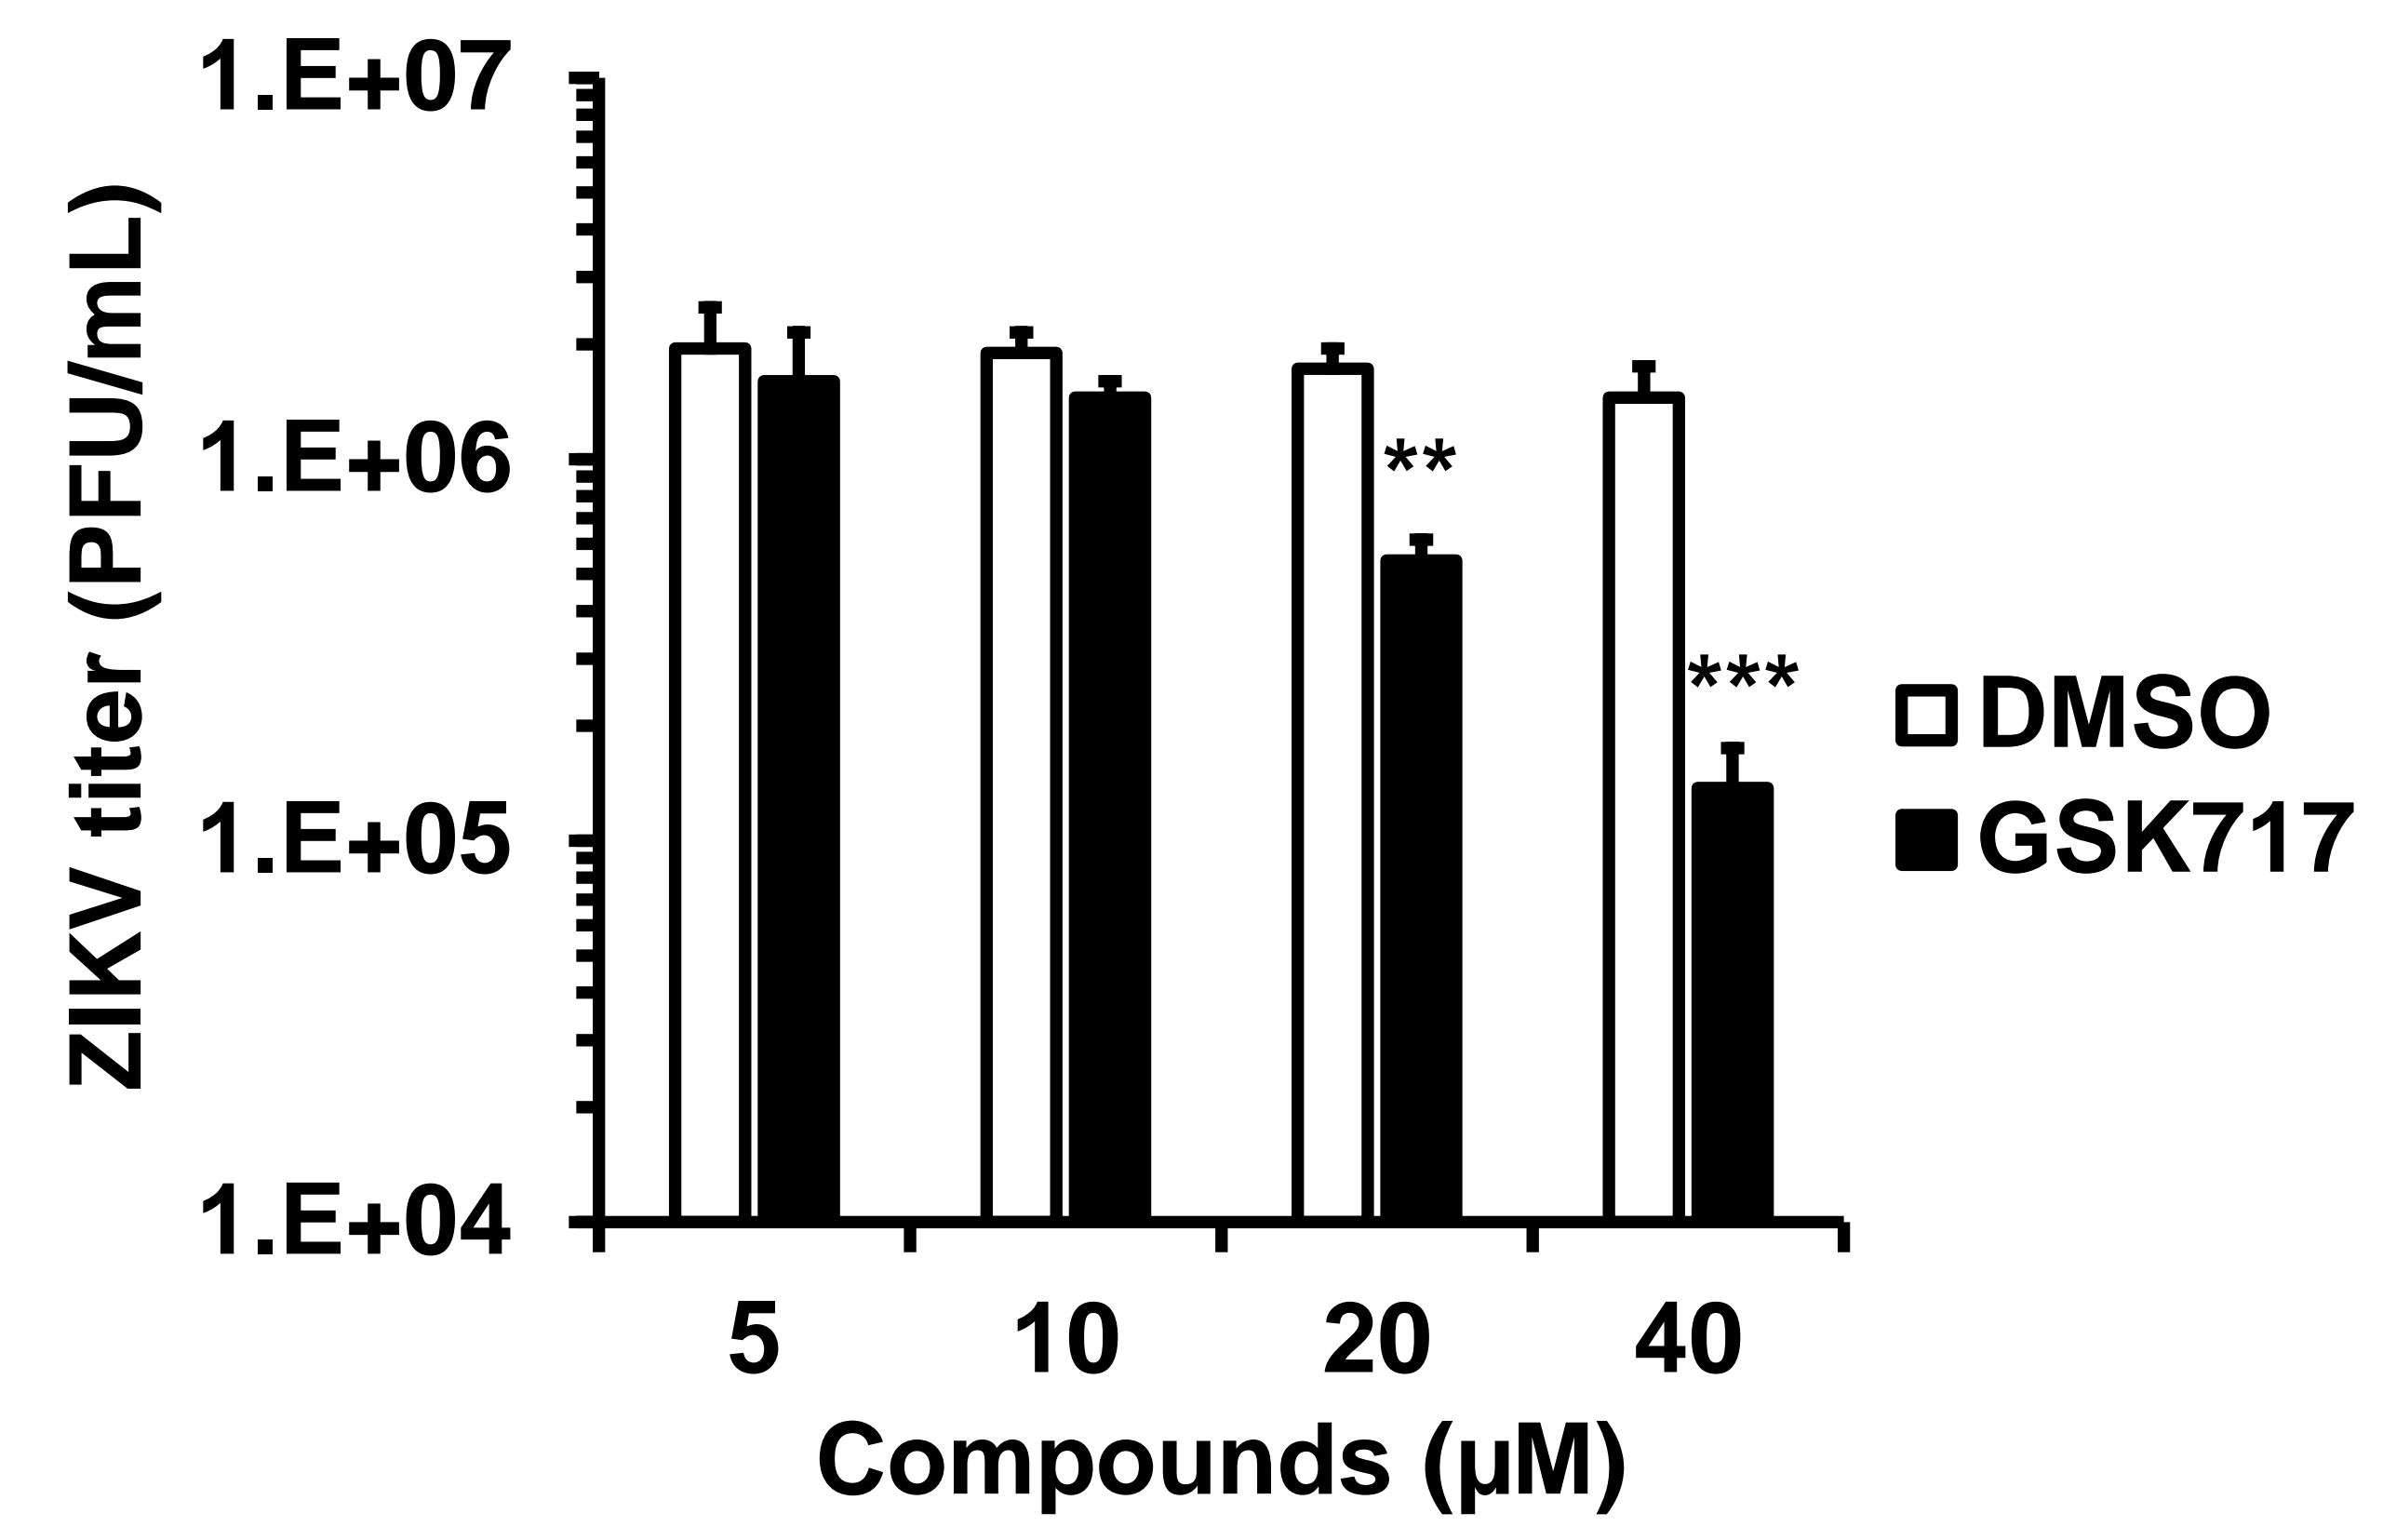**C**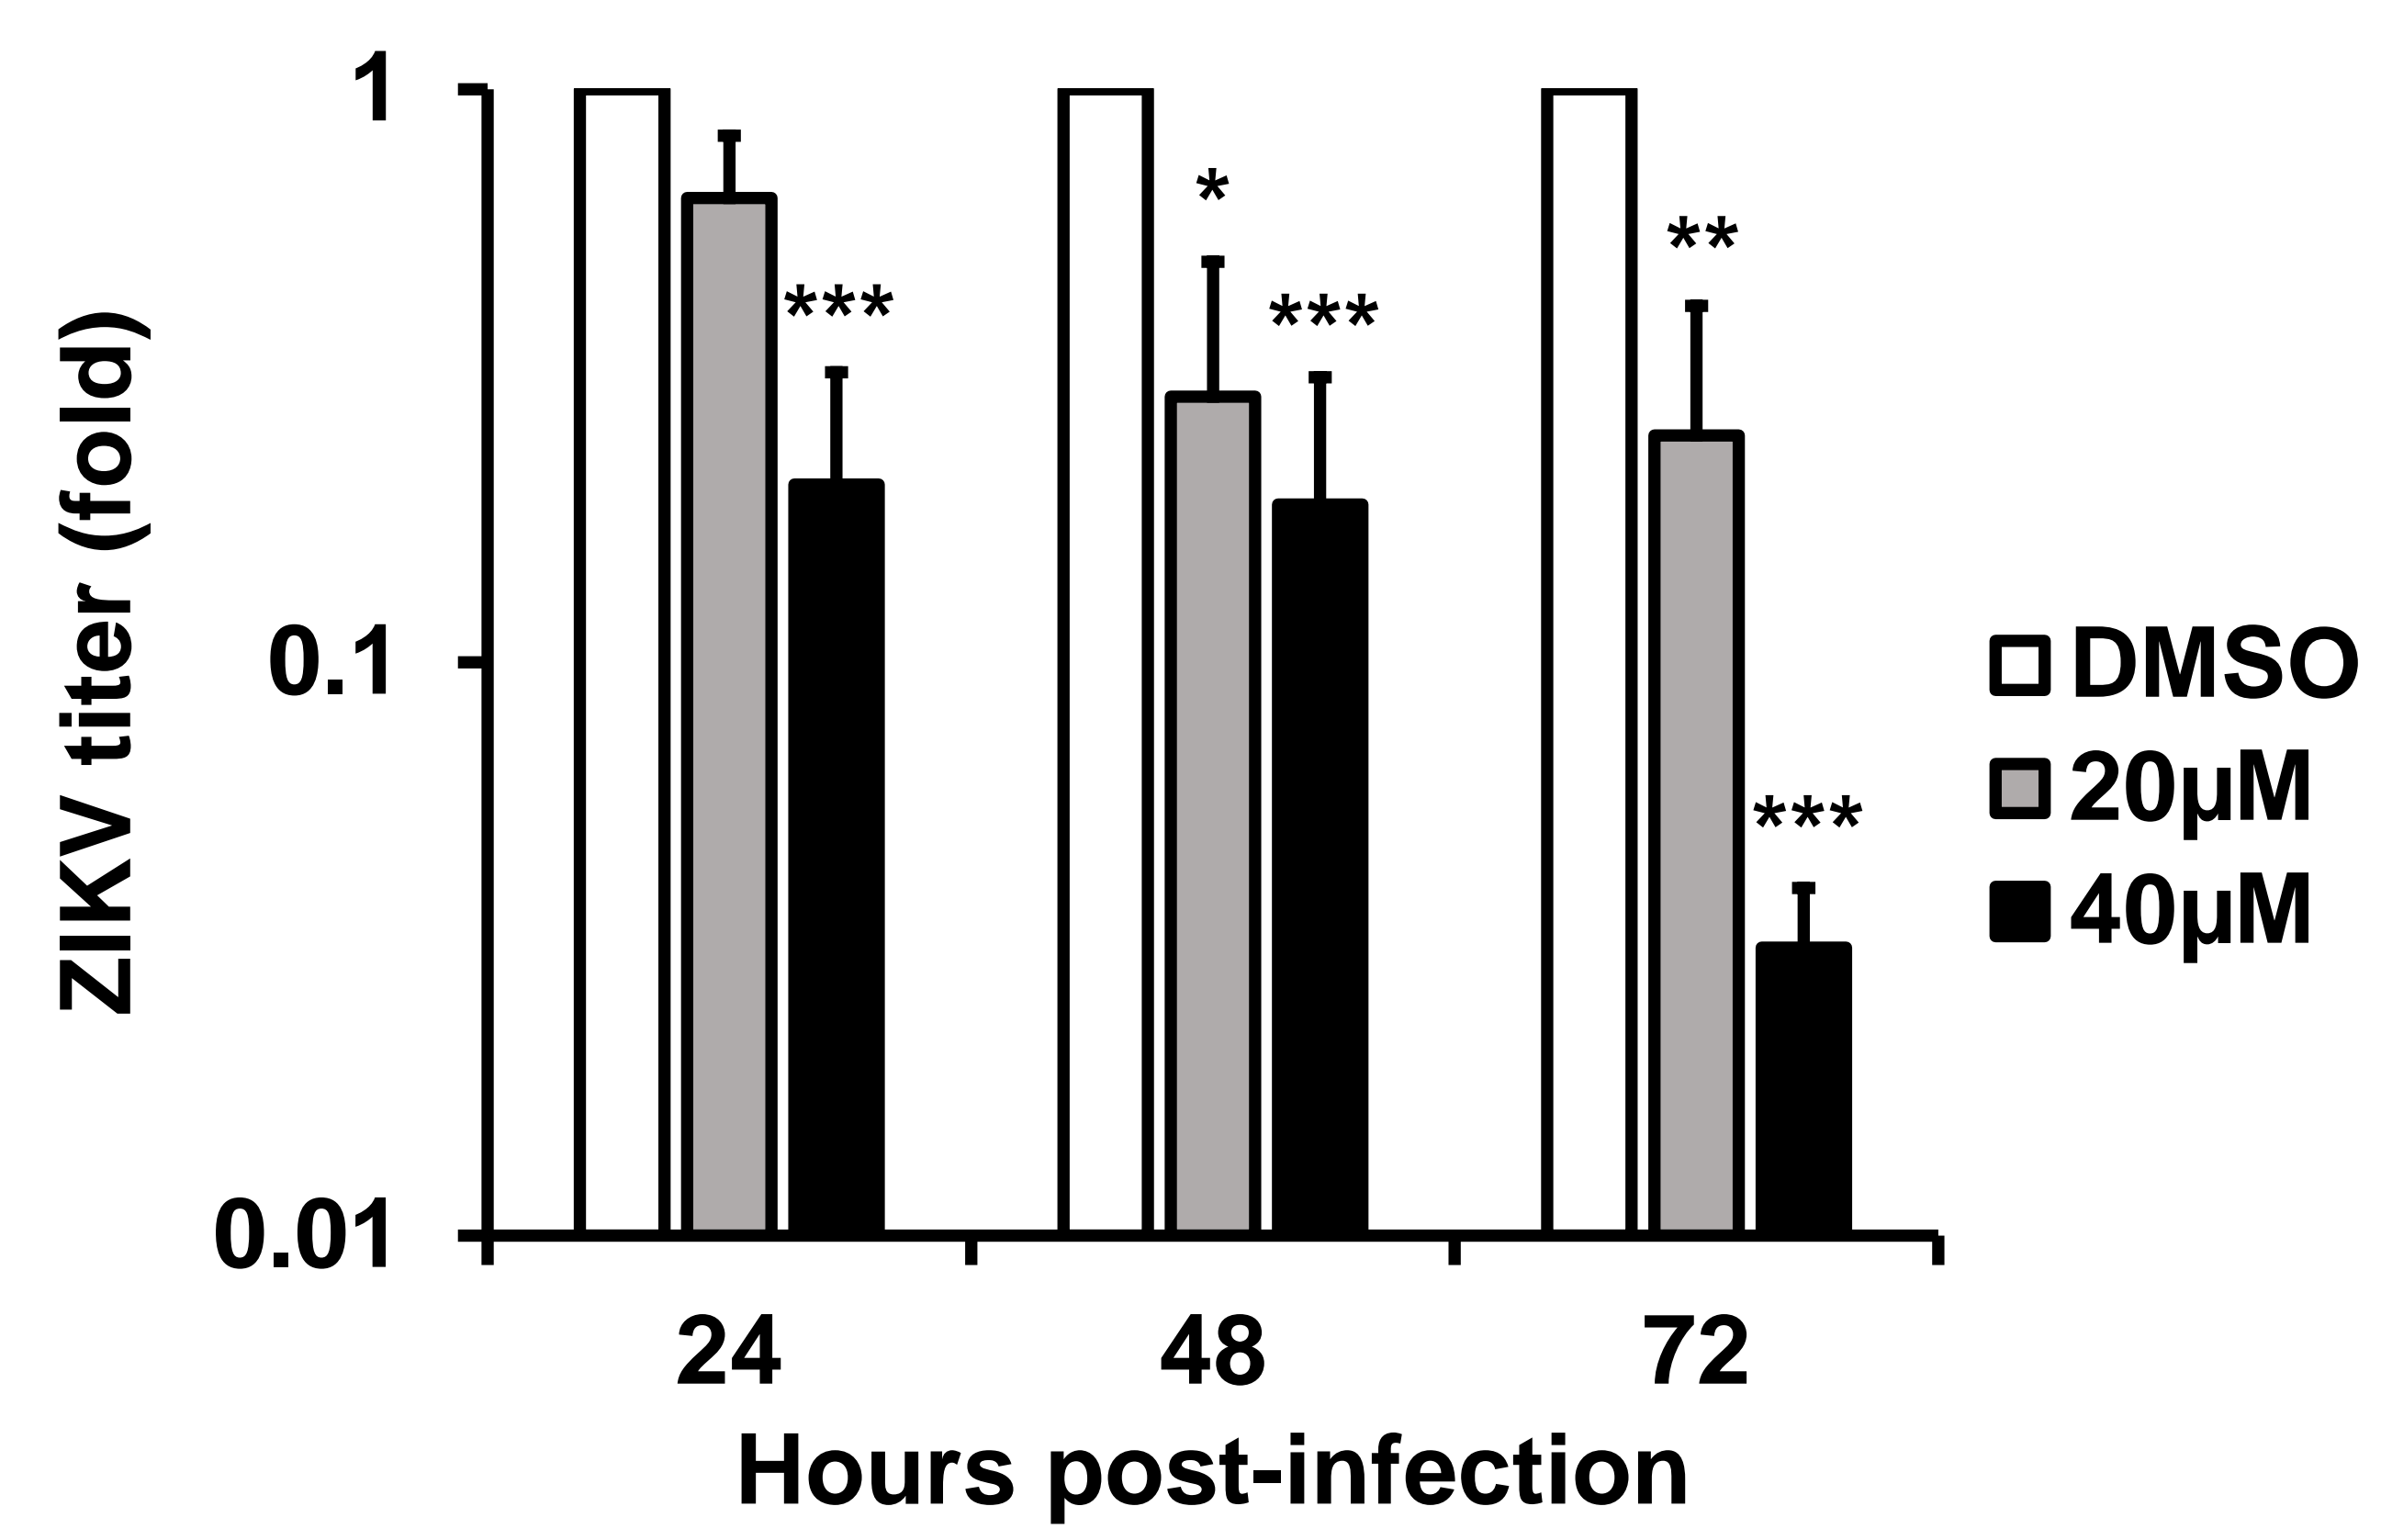**D**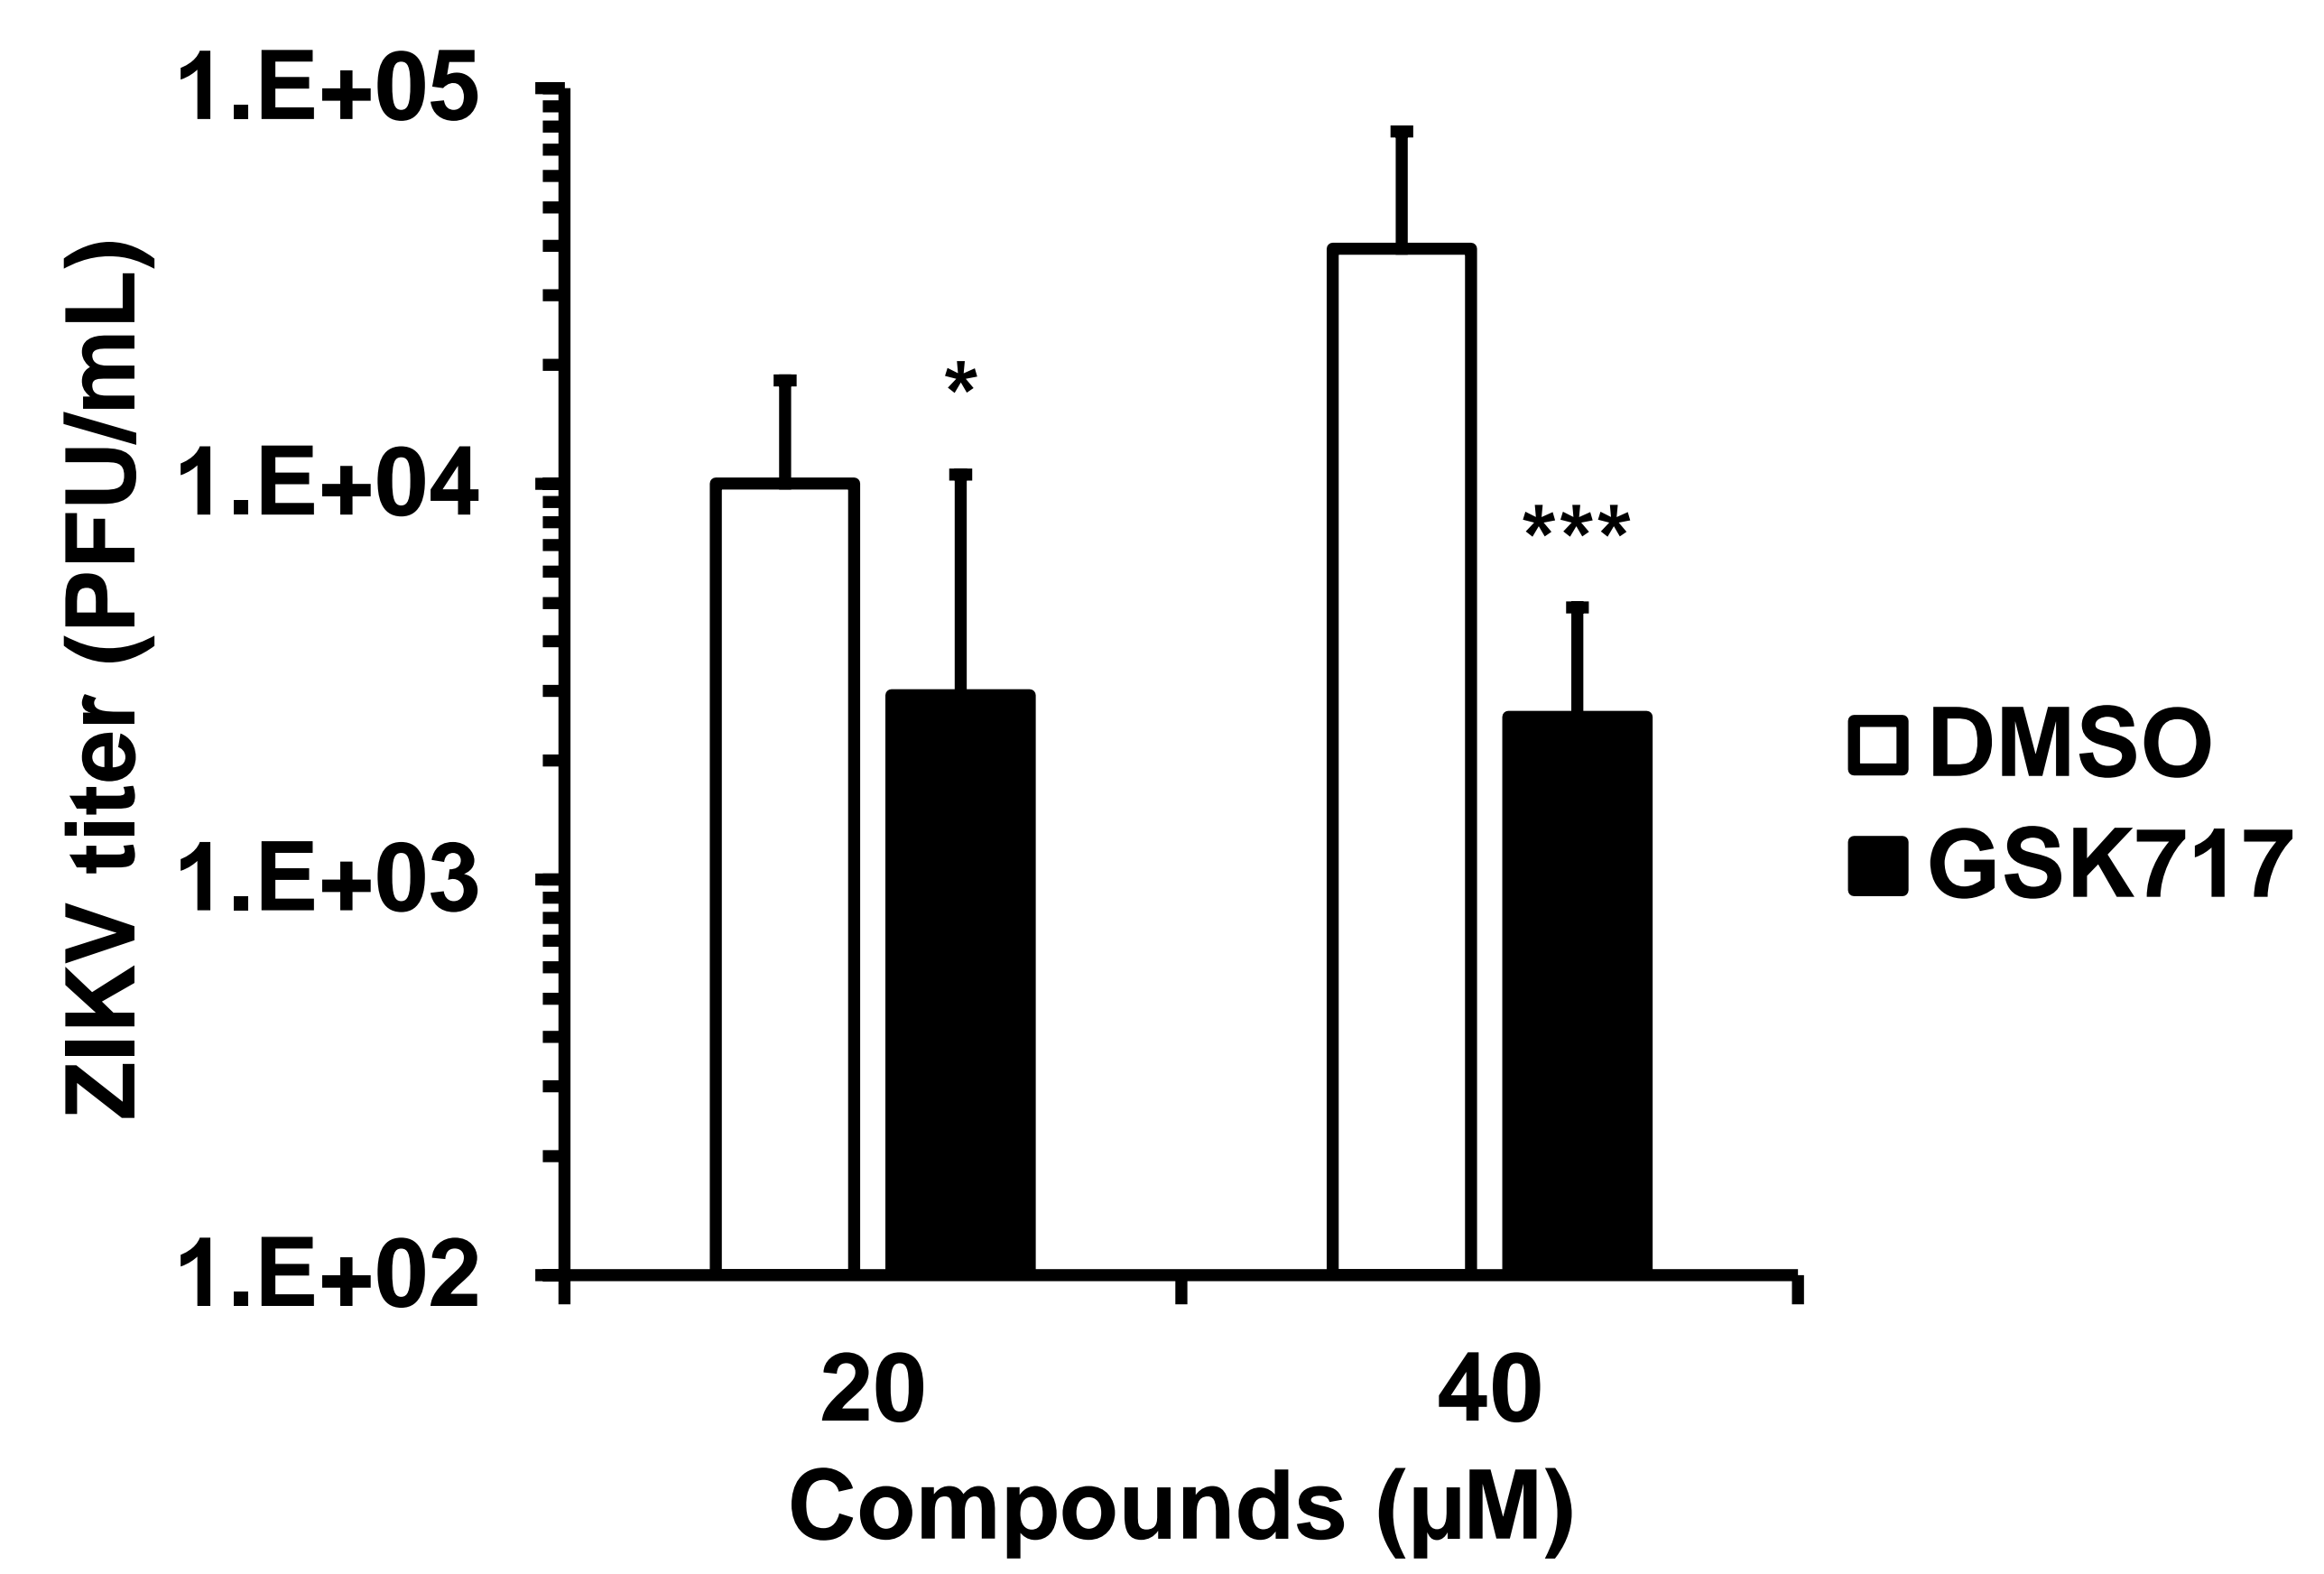**E**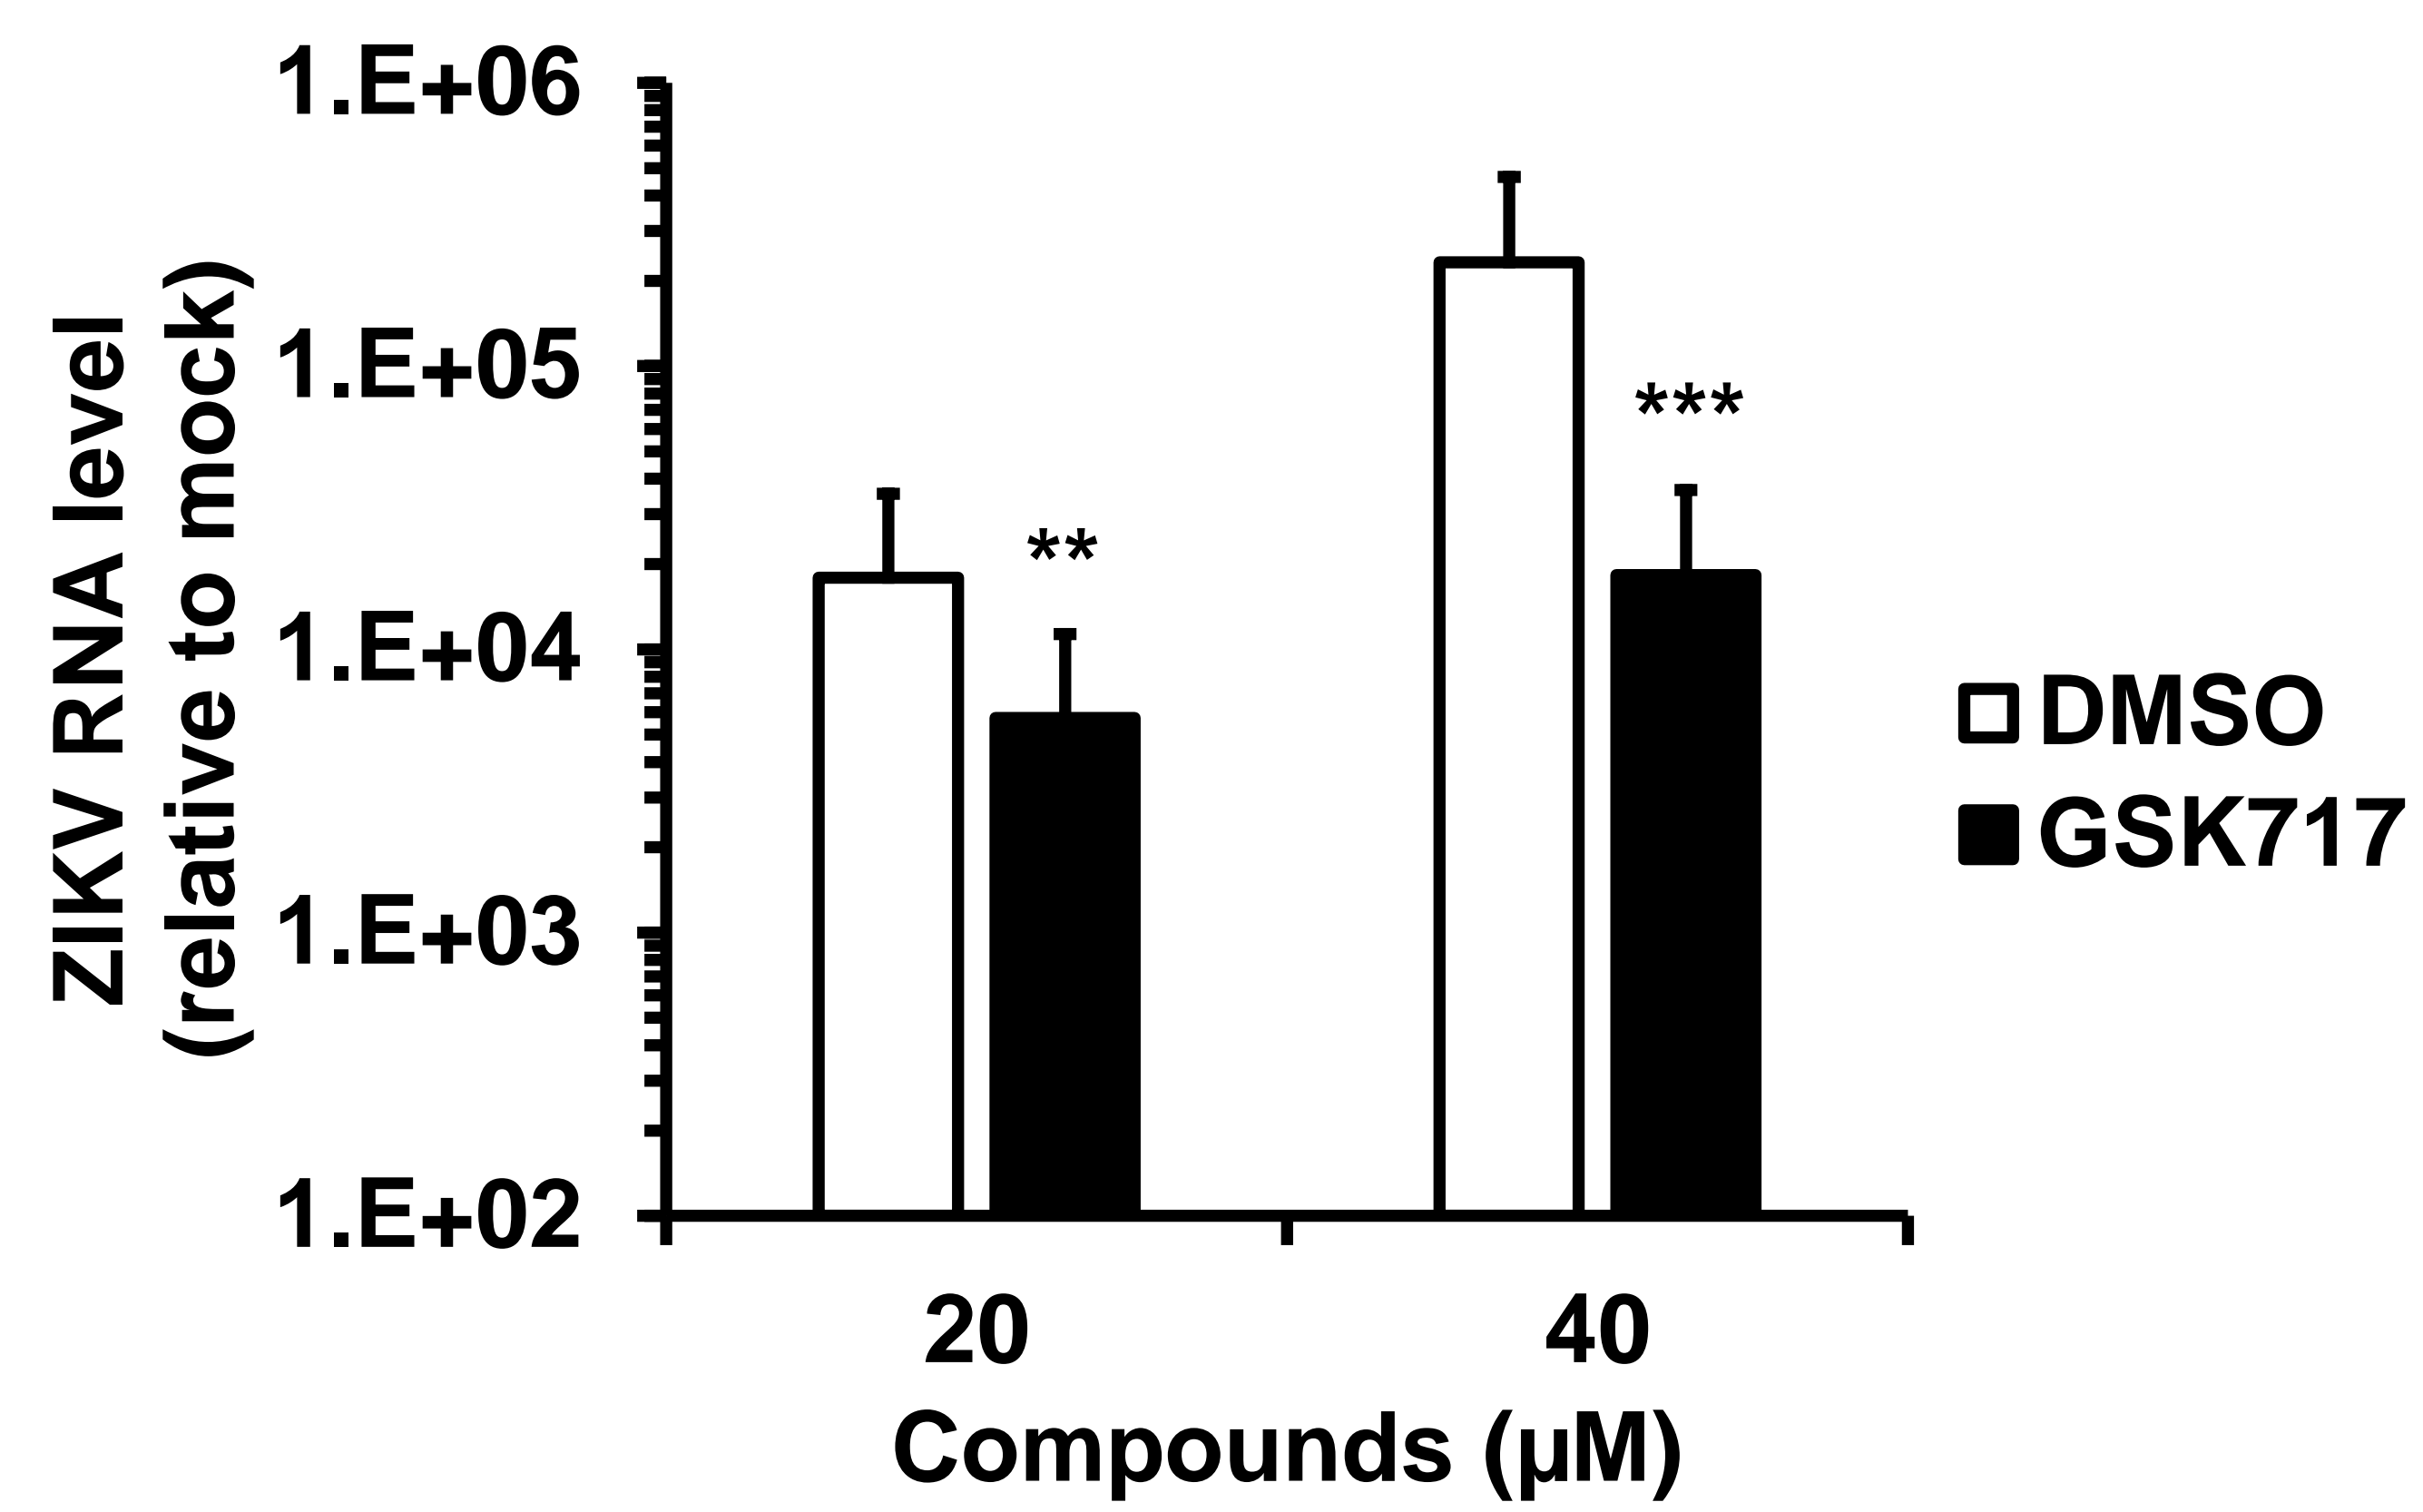

FIG 4

A

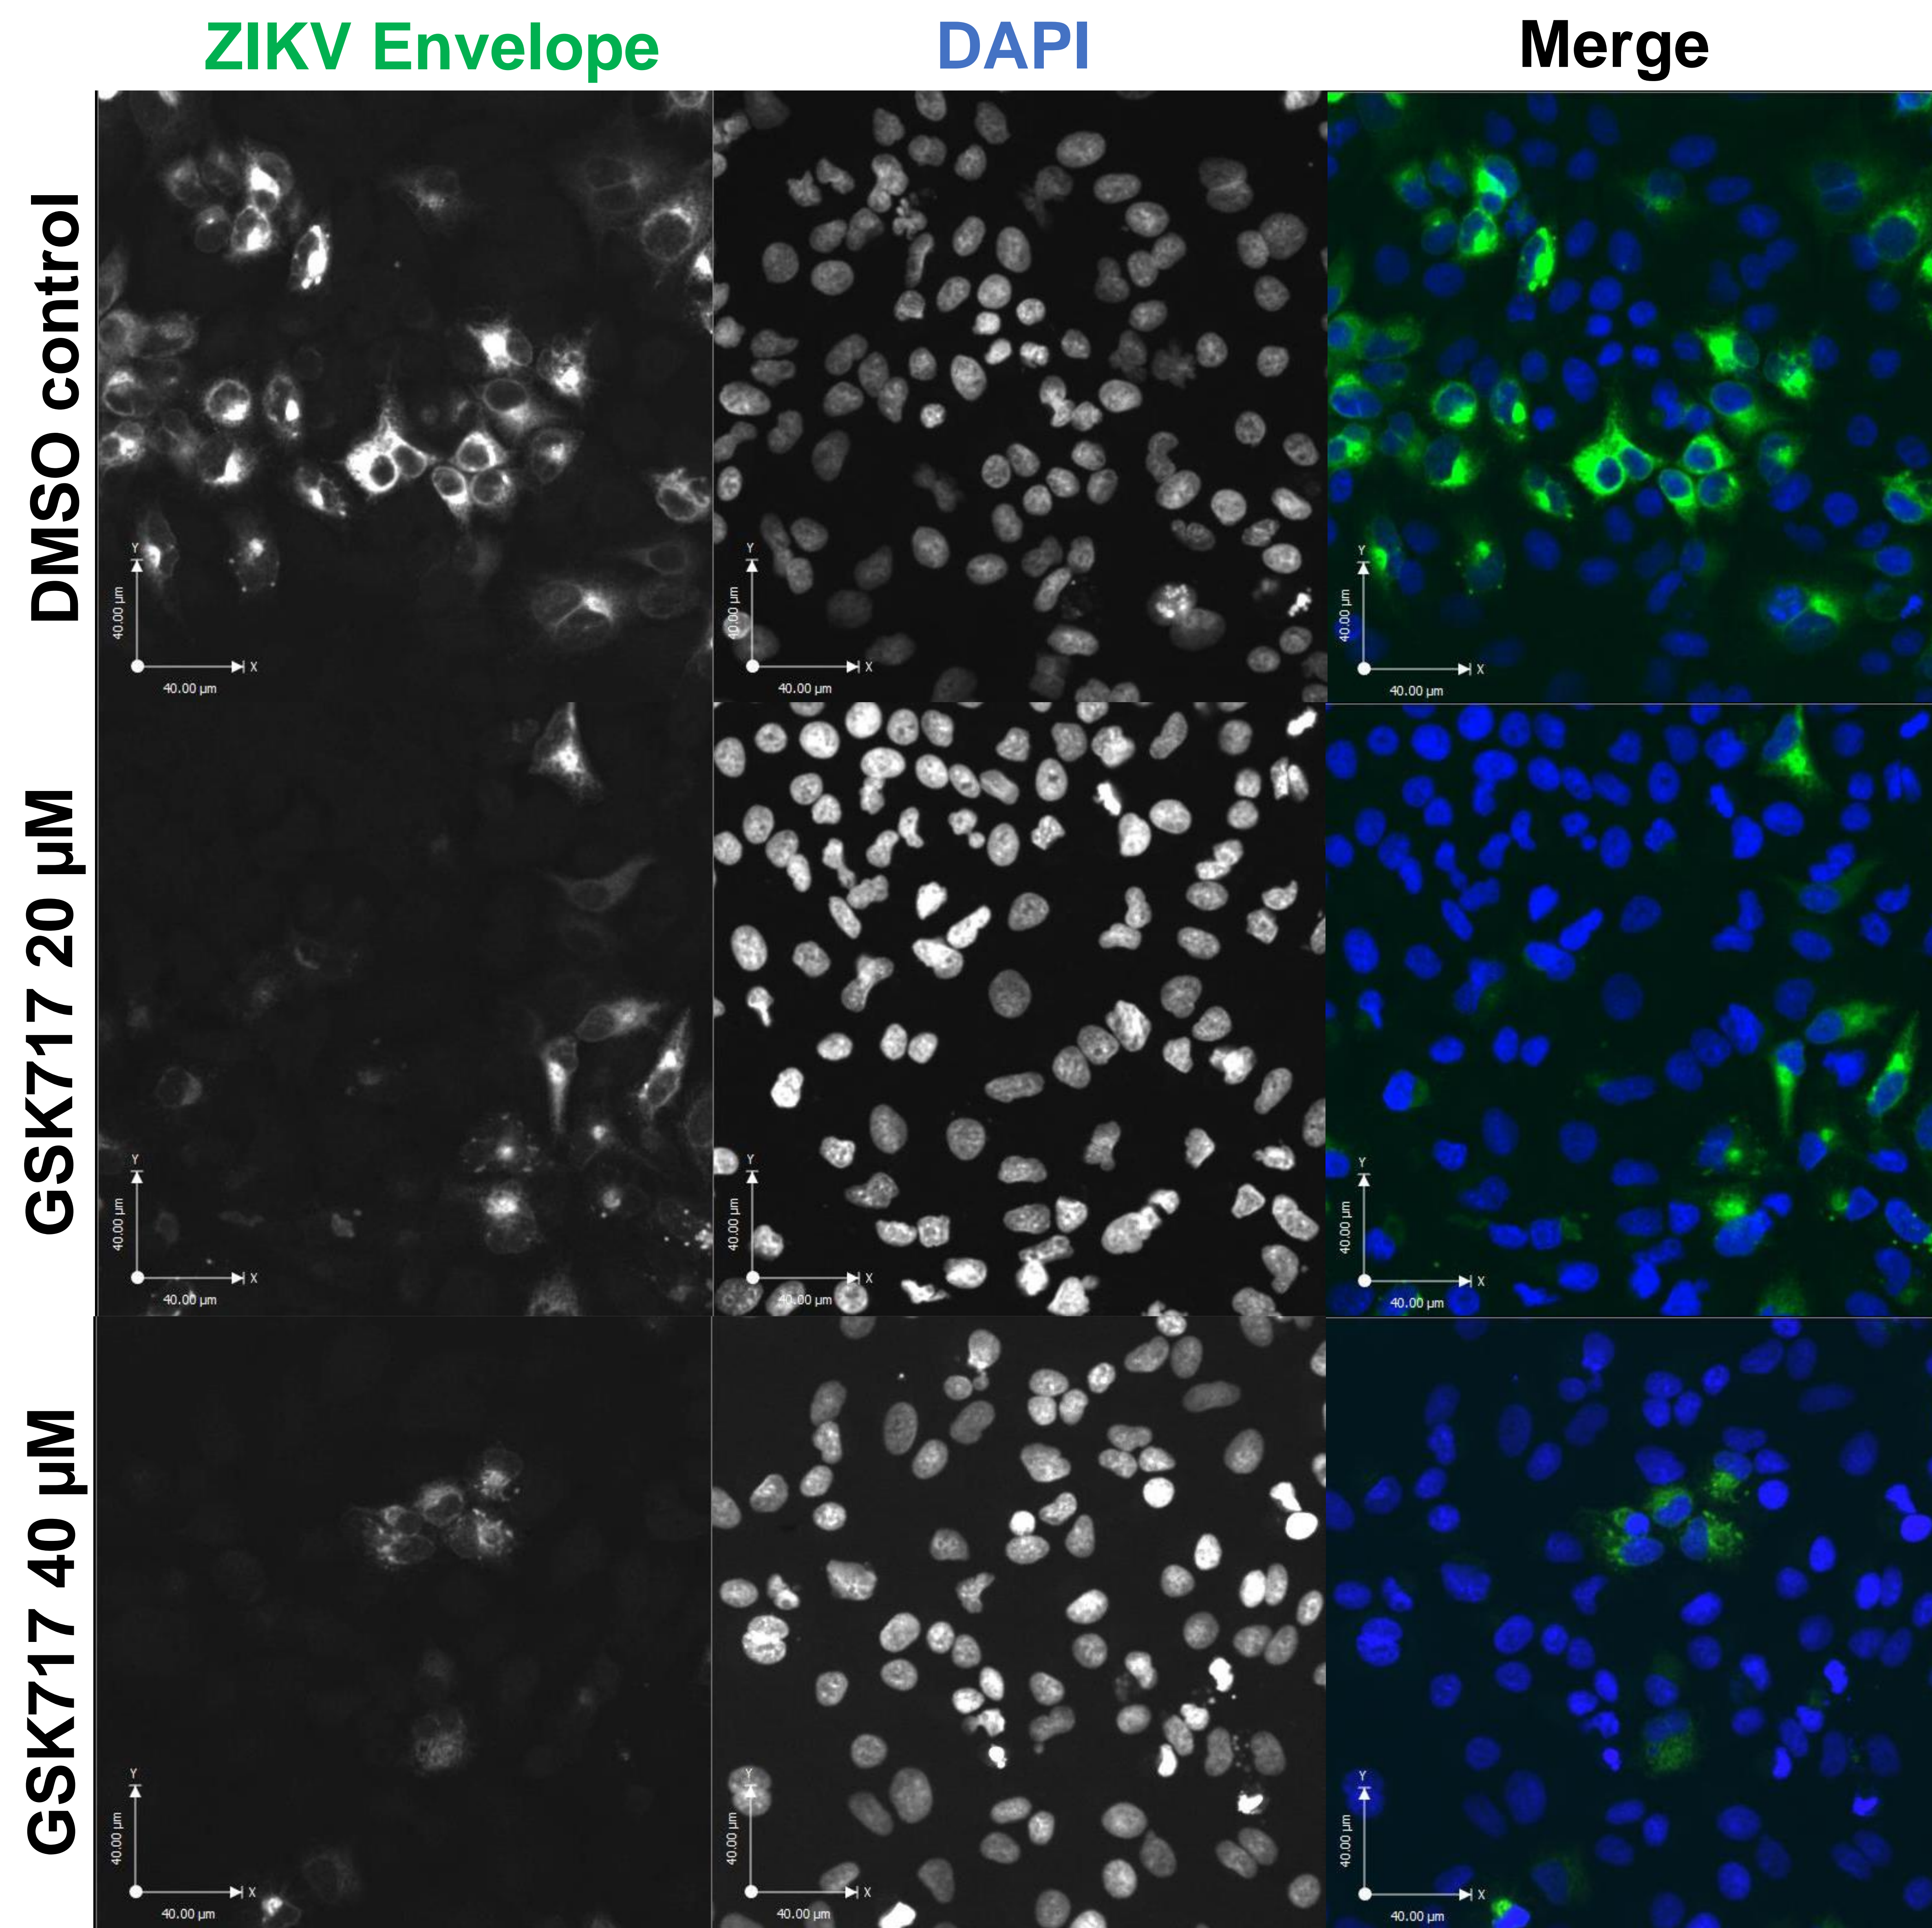

B

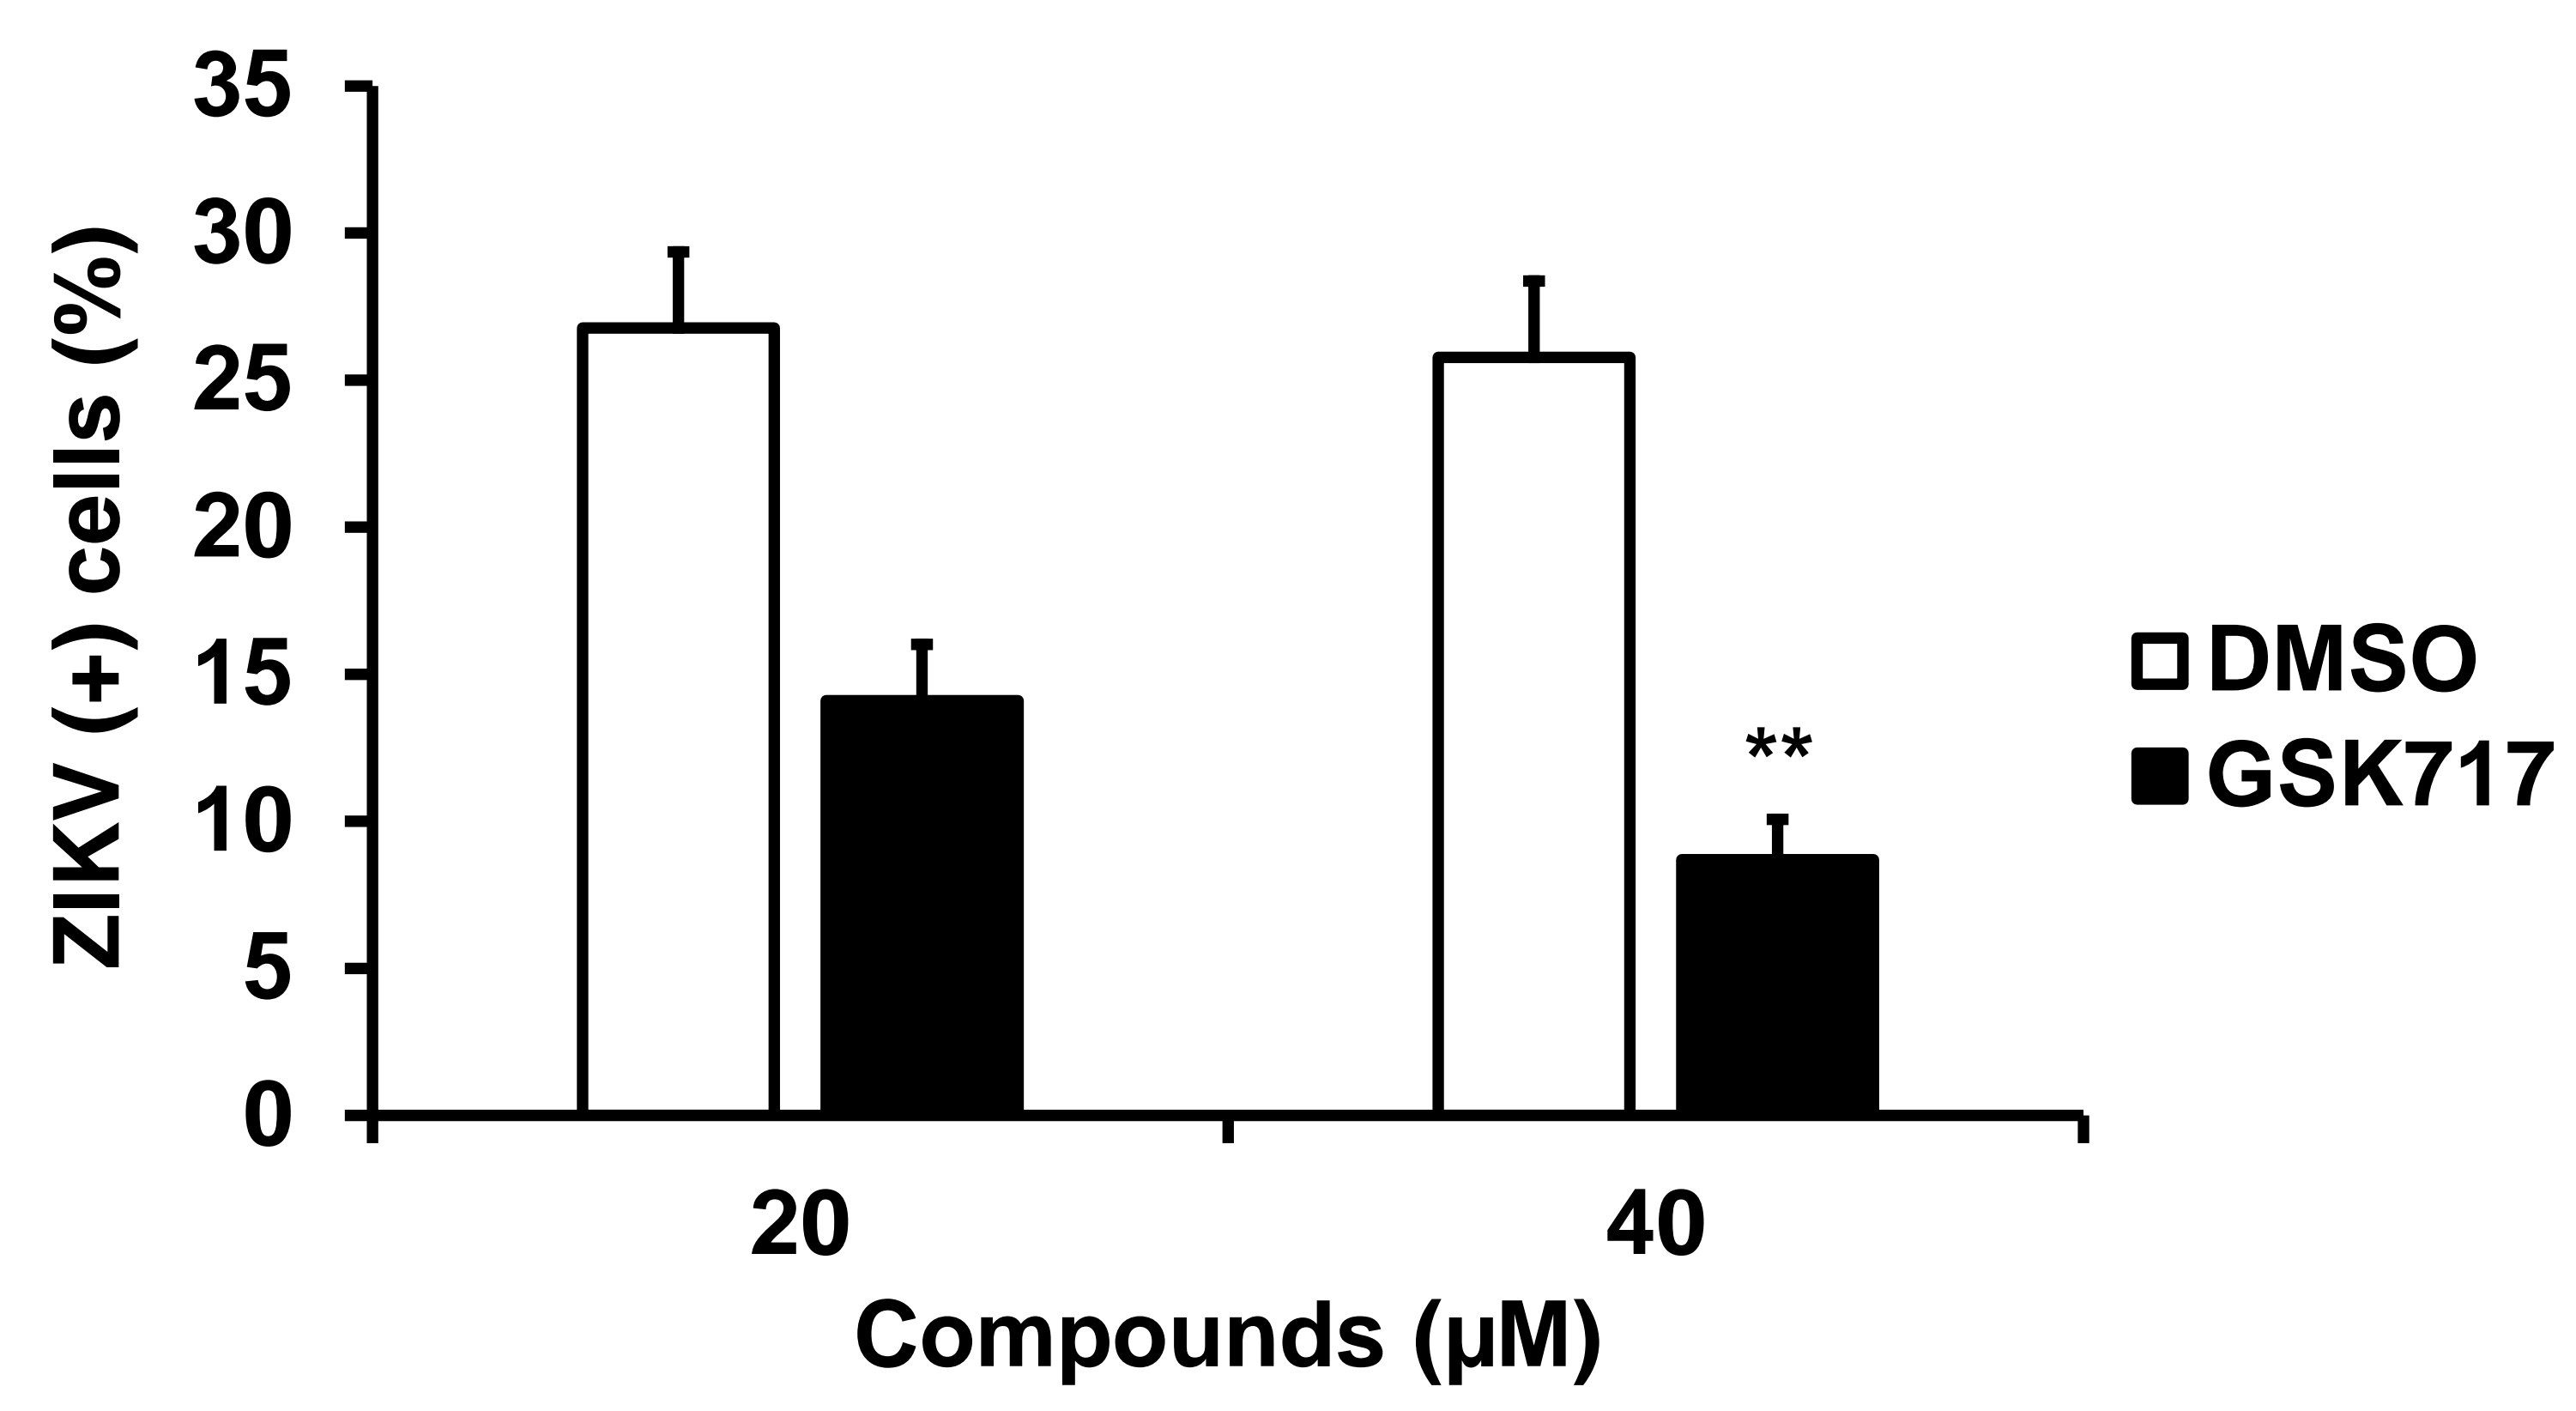

**FIG 5****A**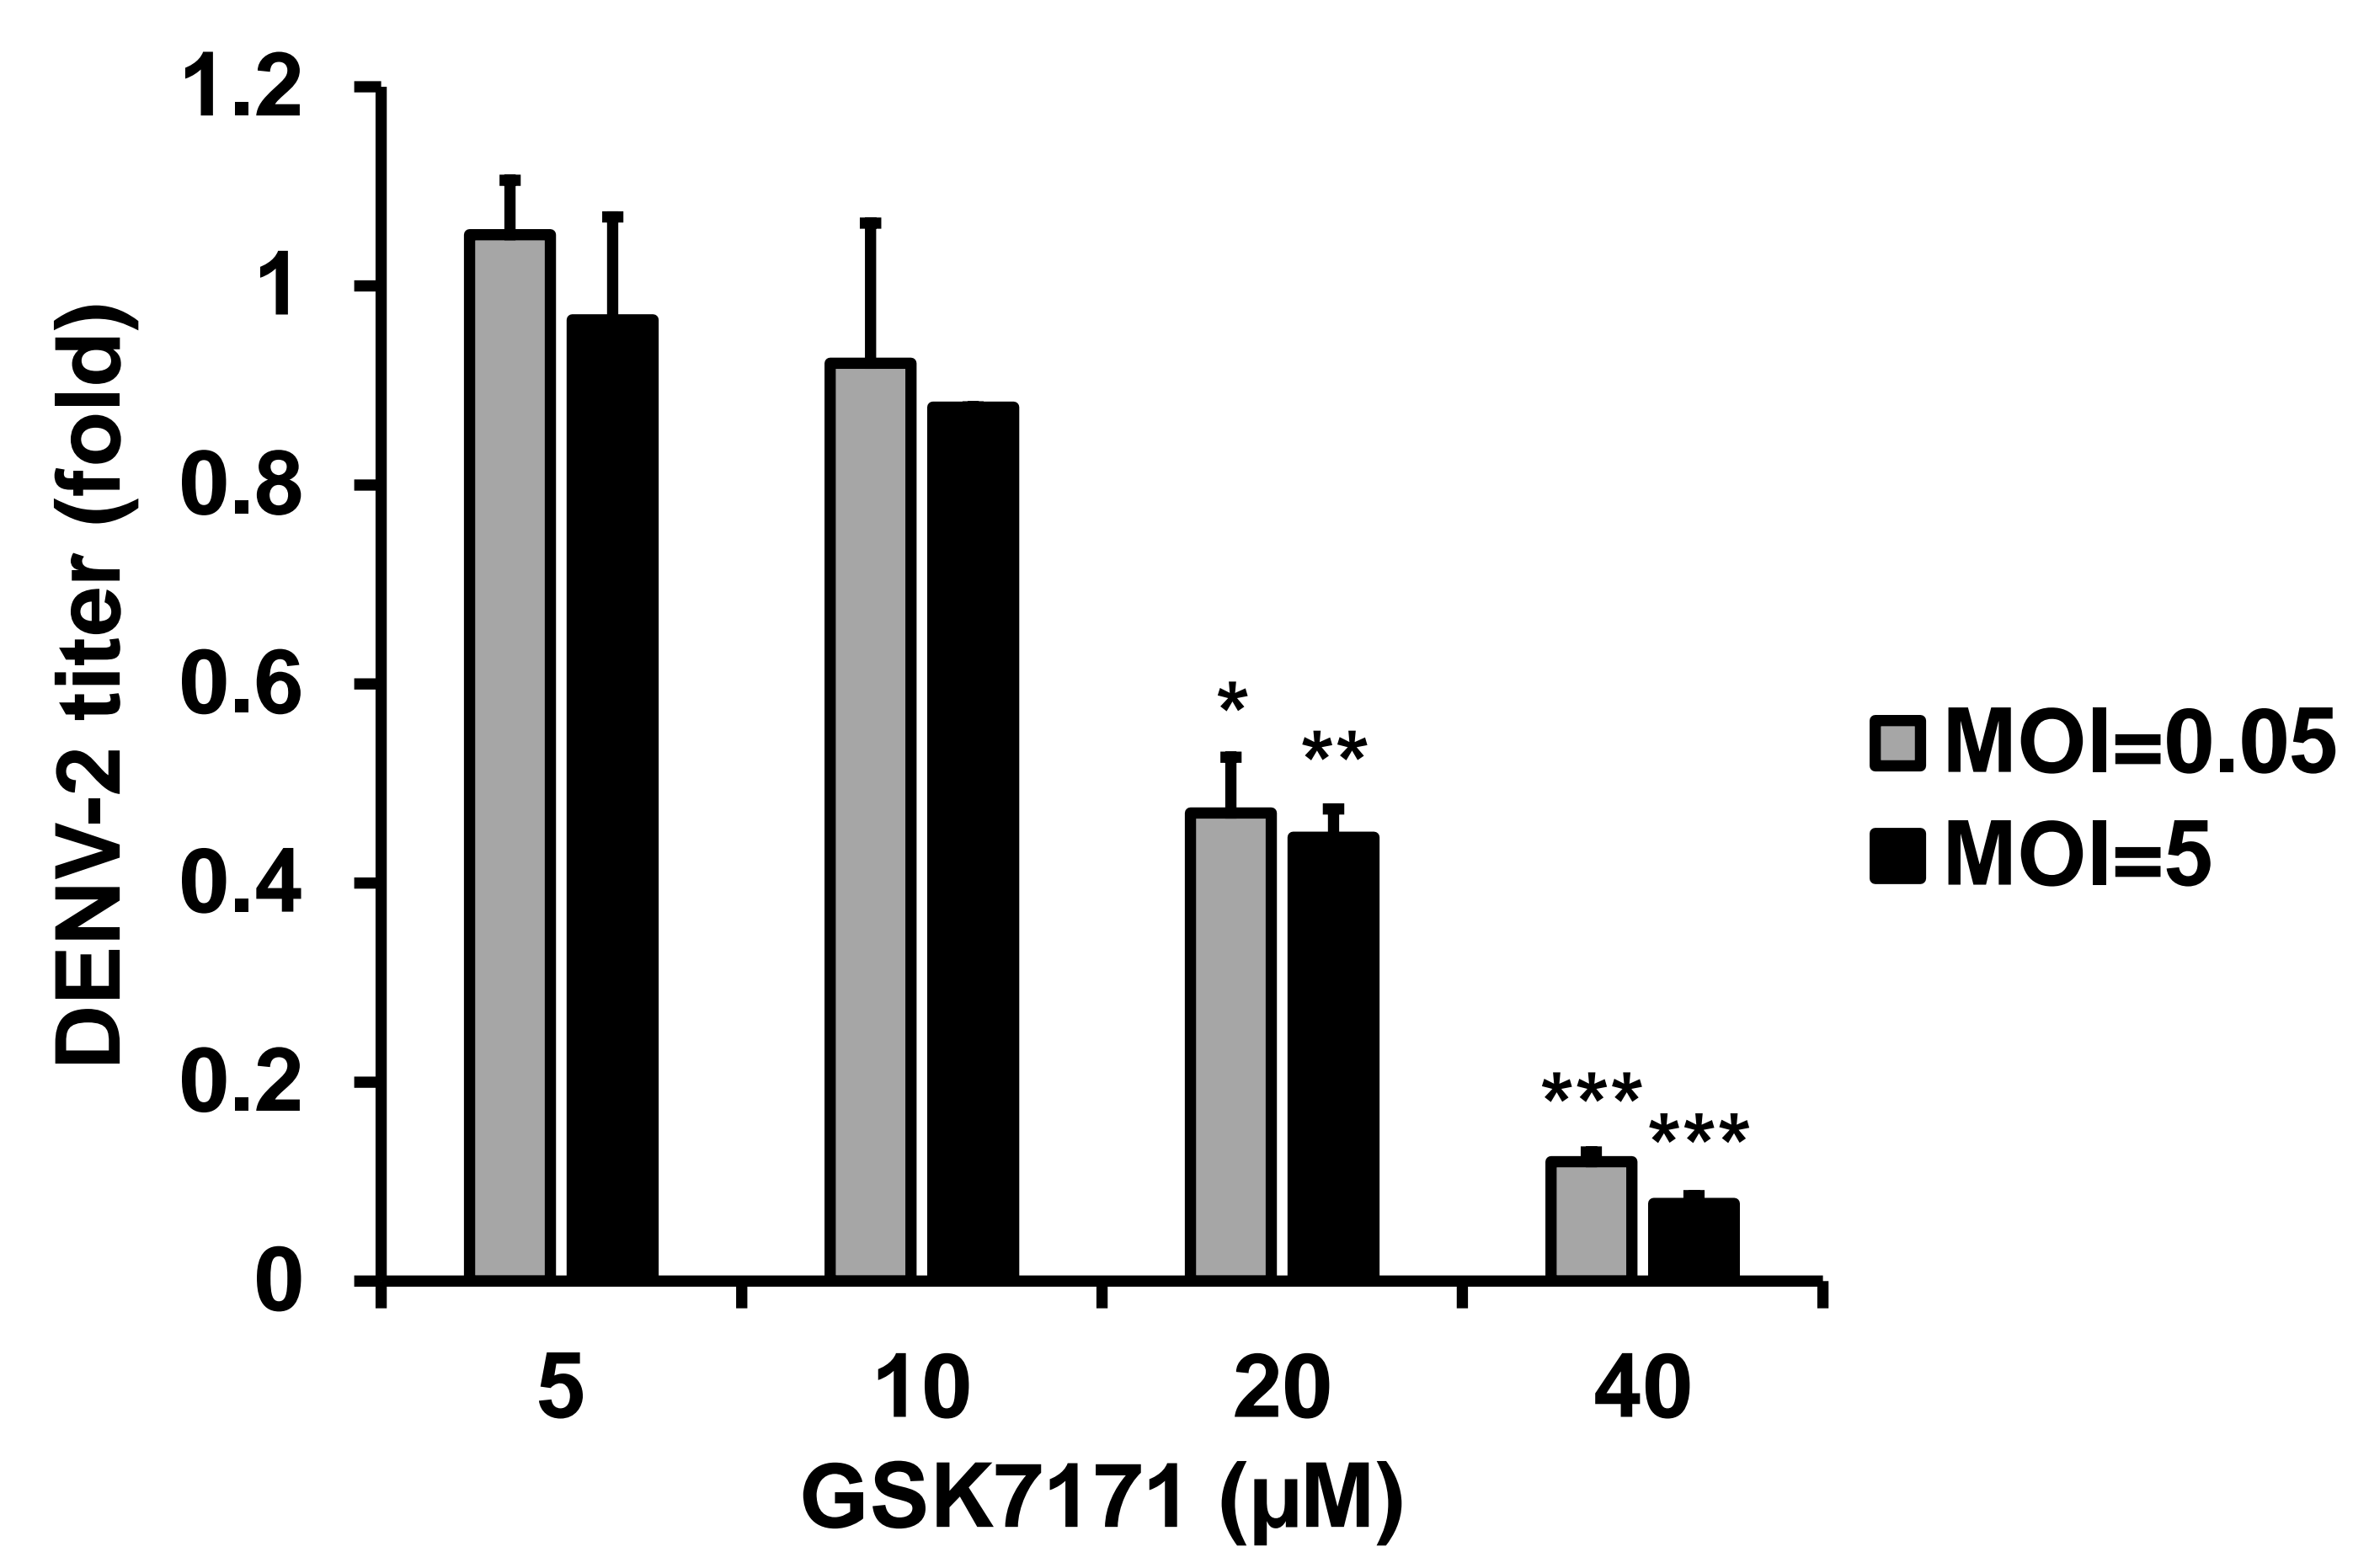**B**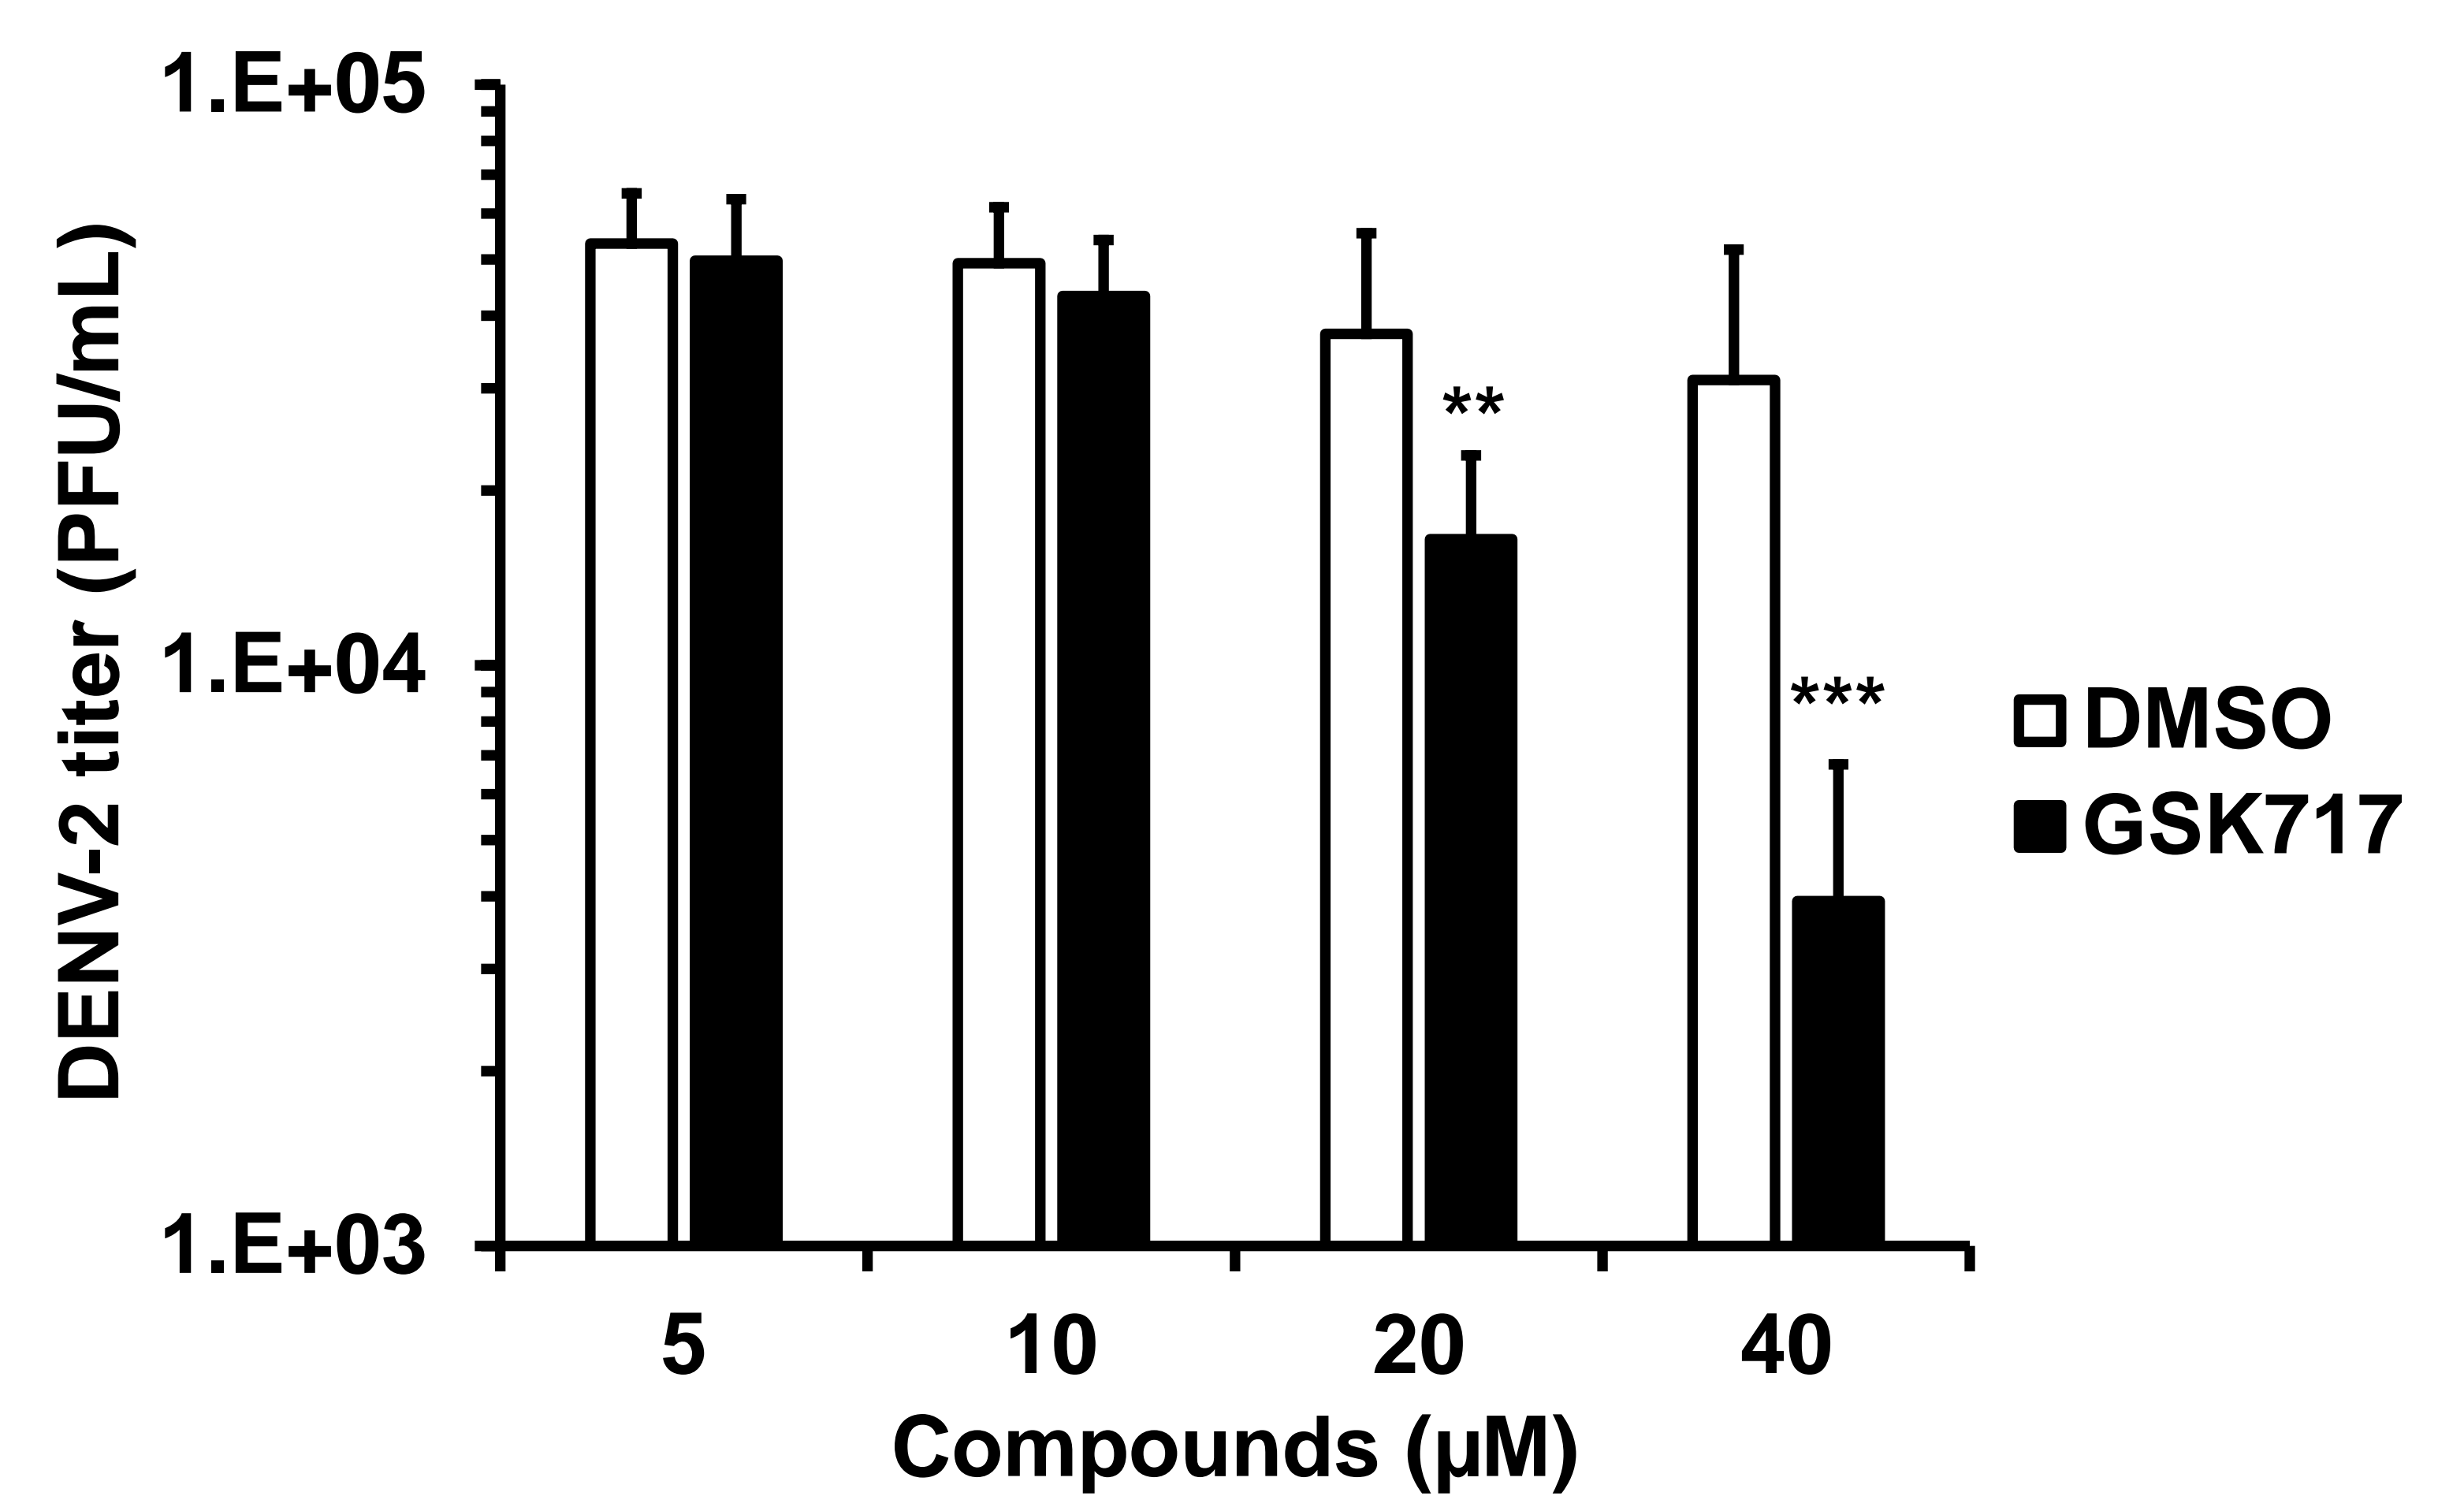**C**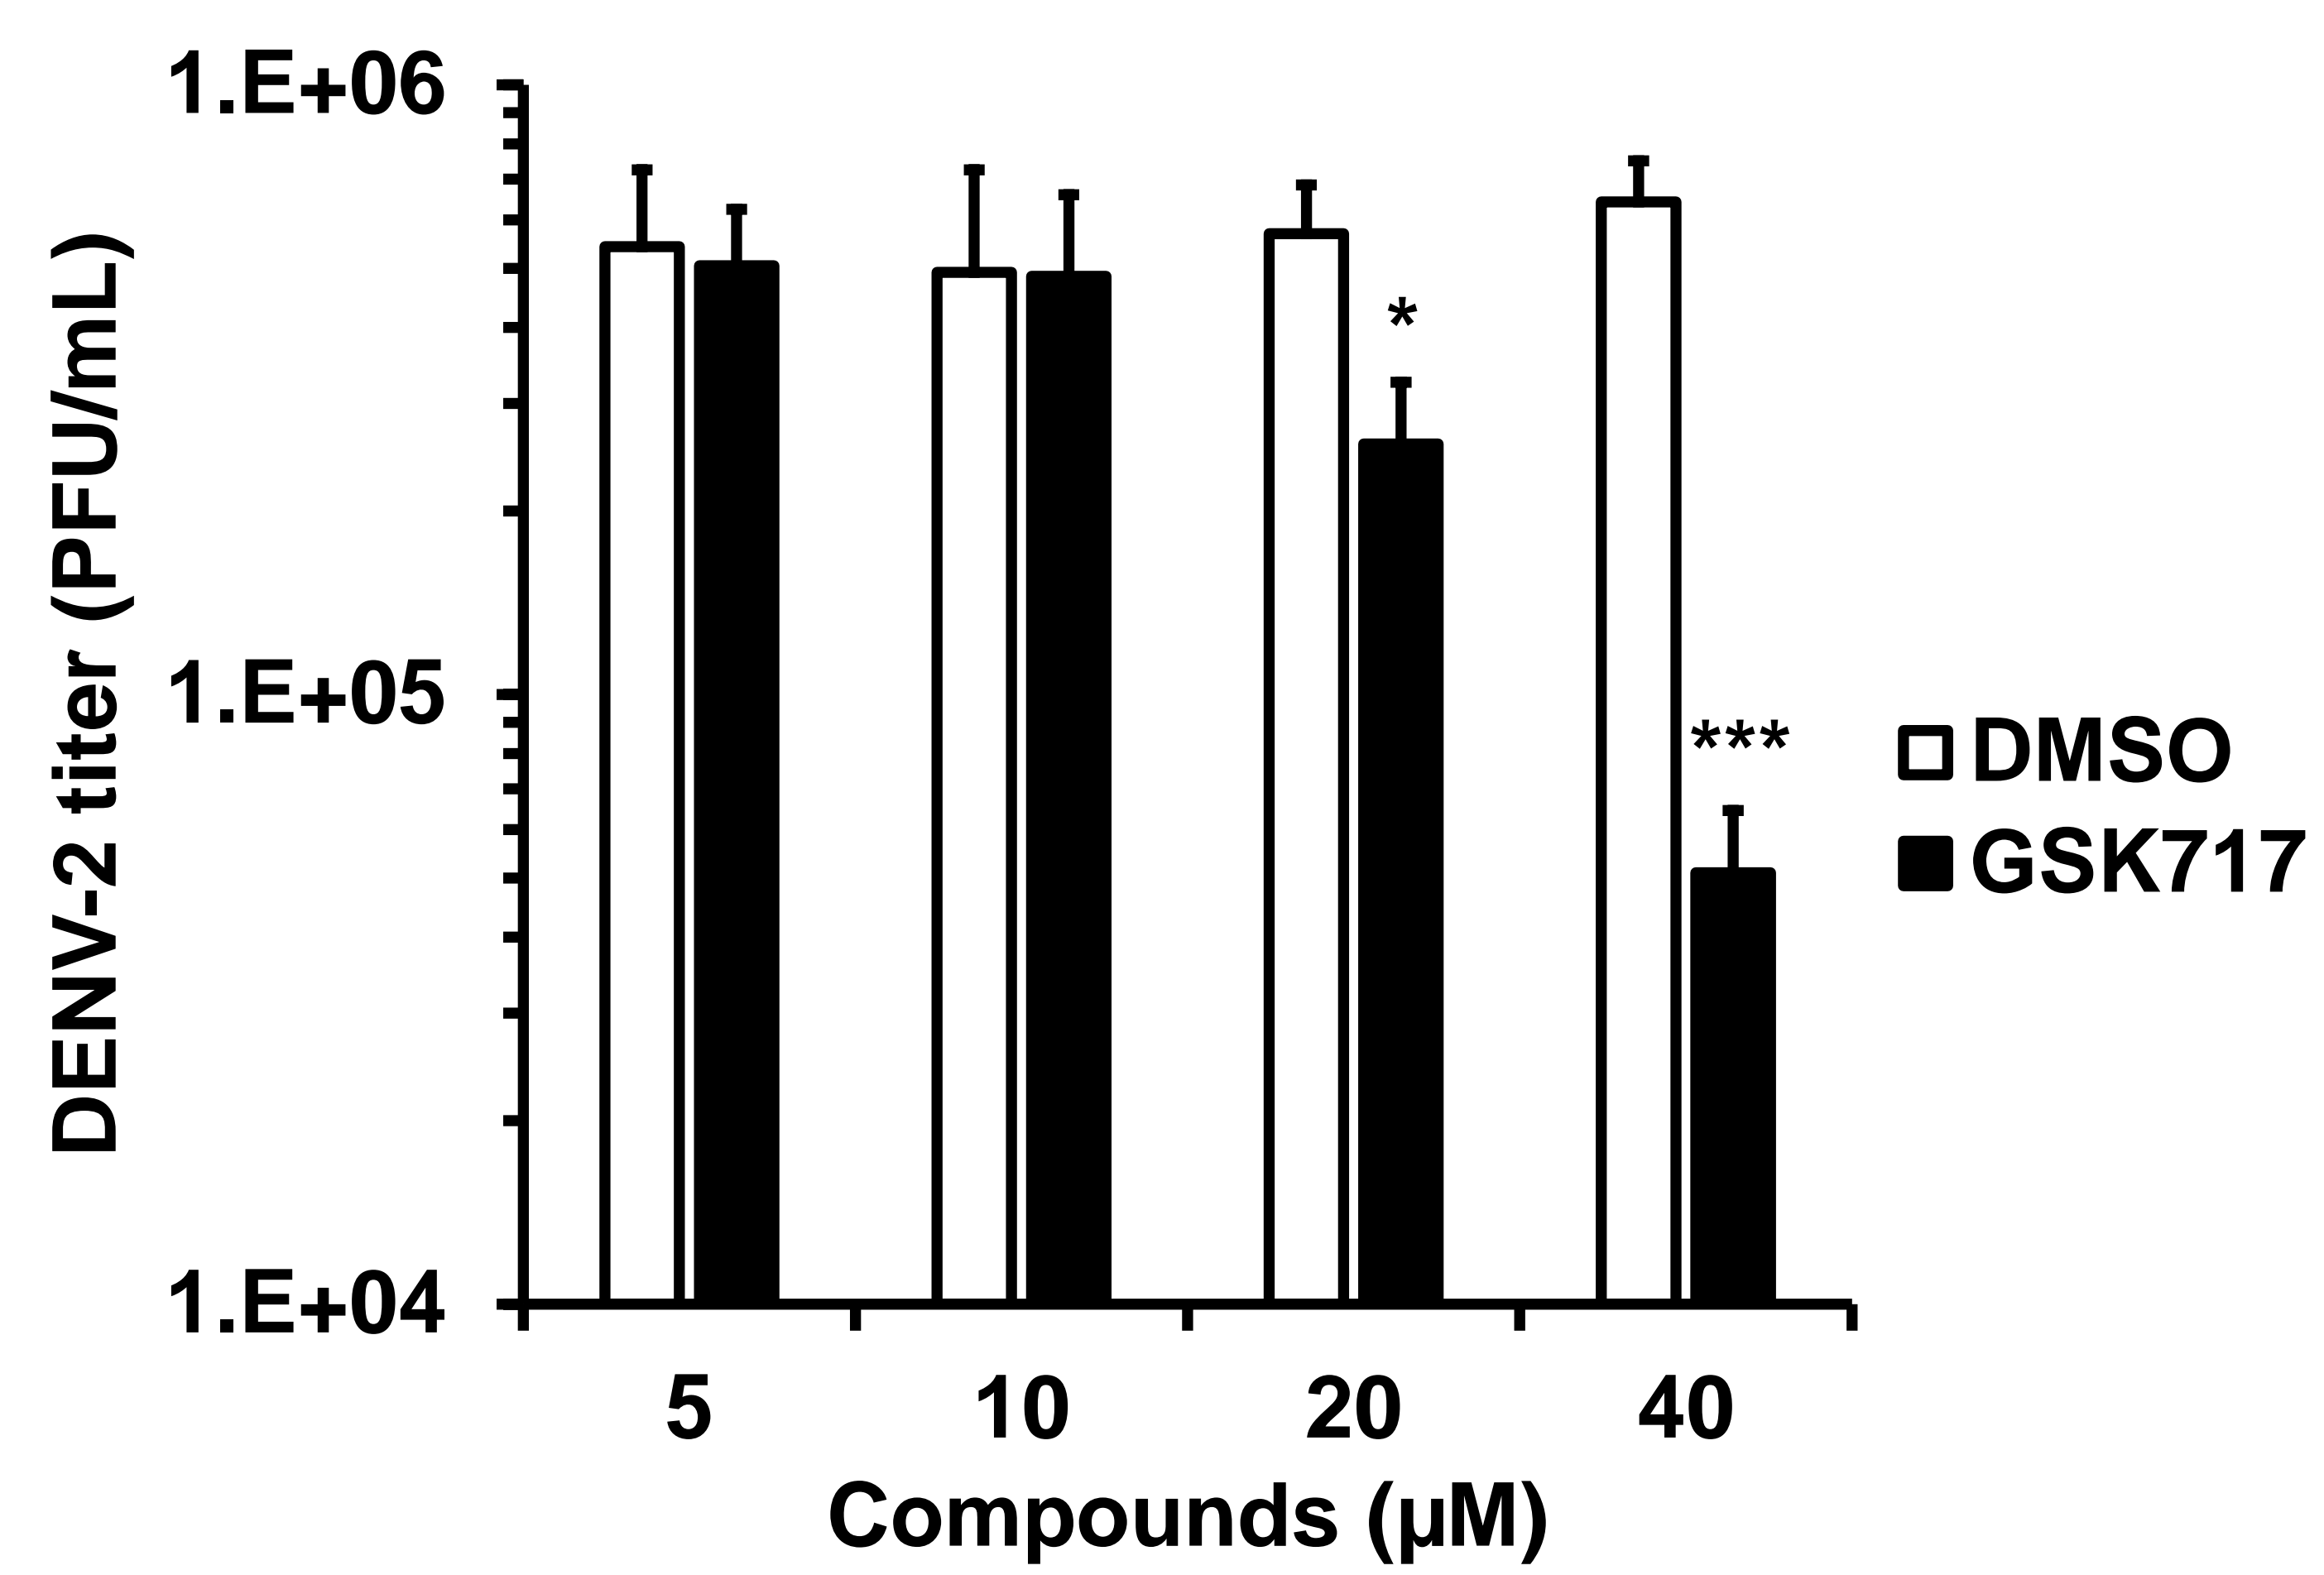**D**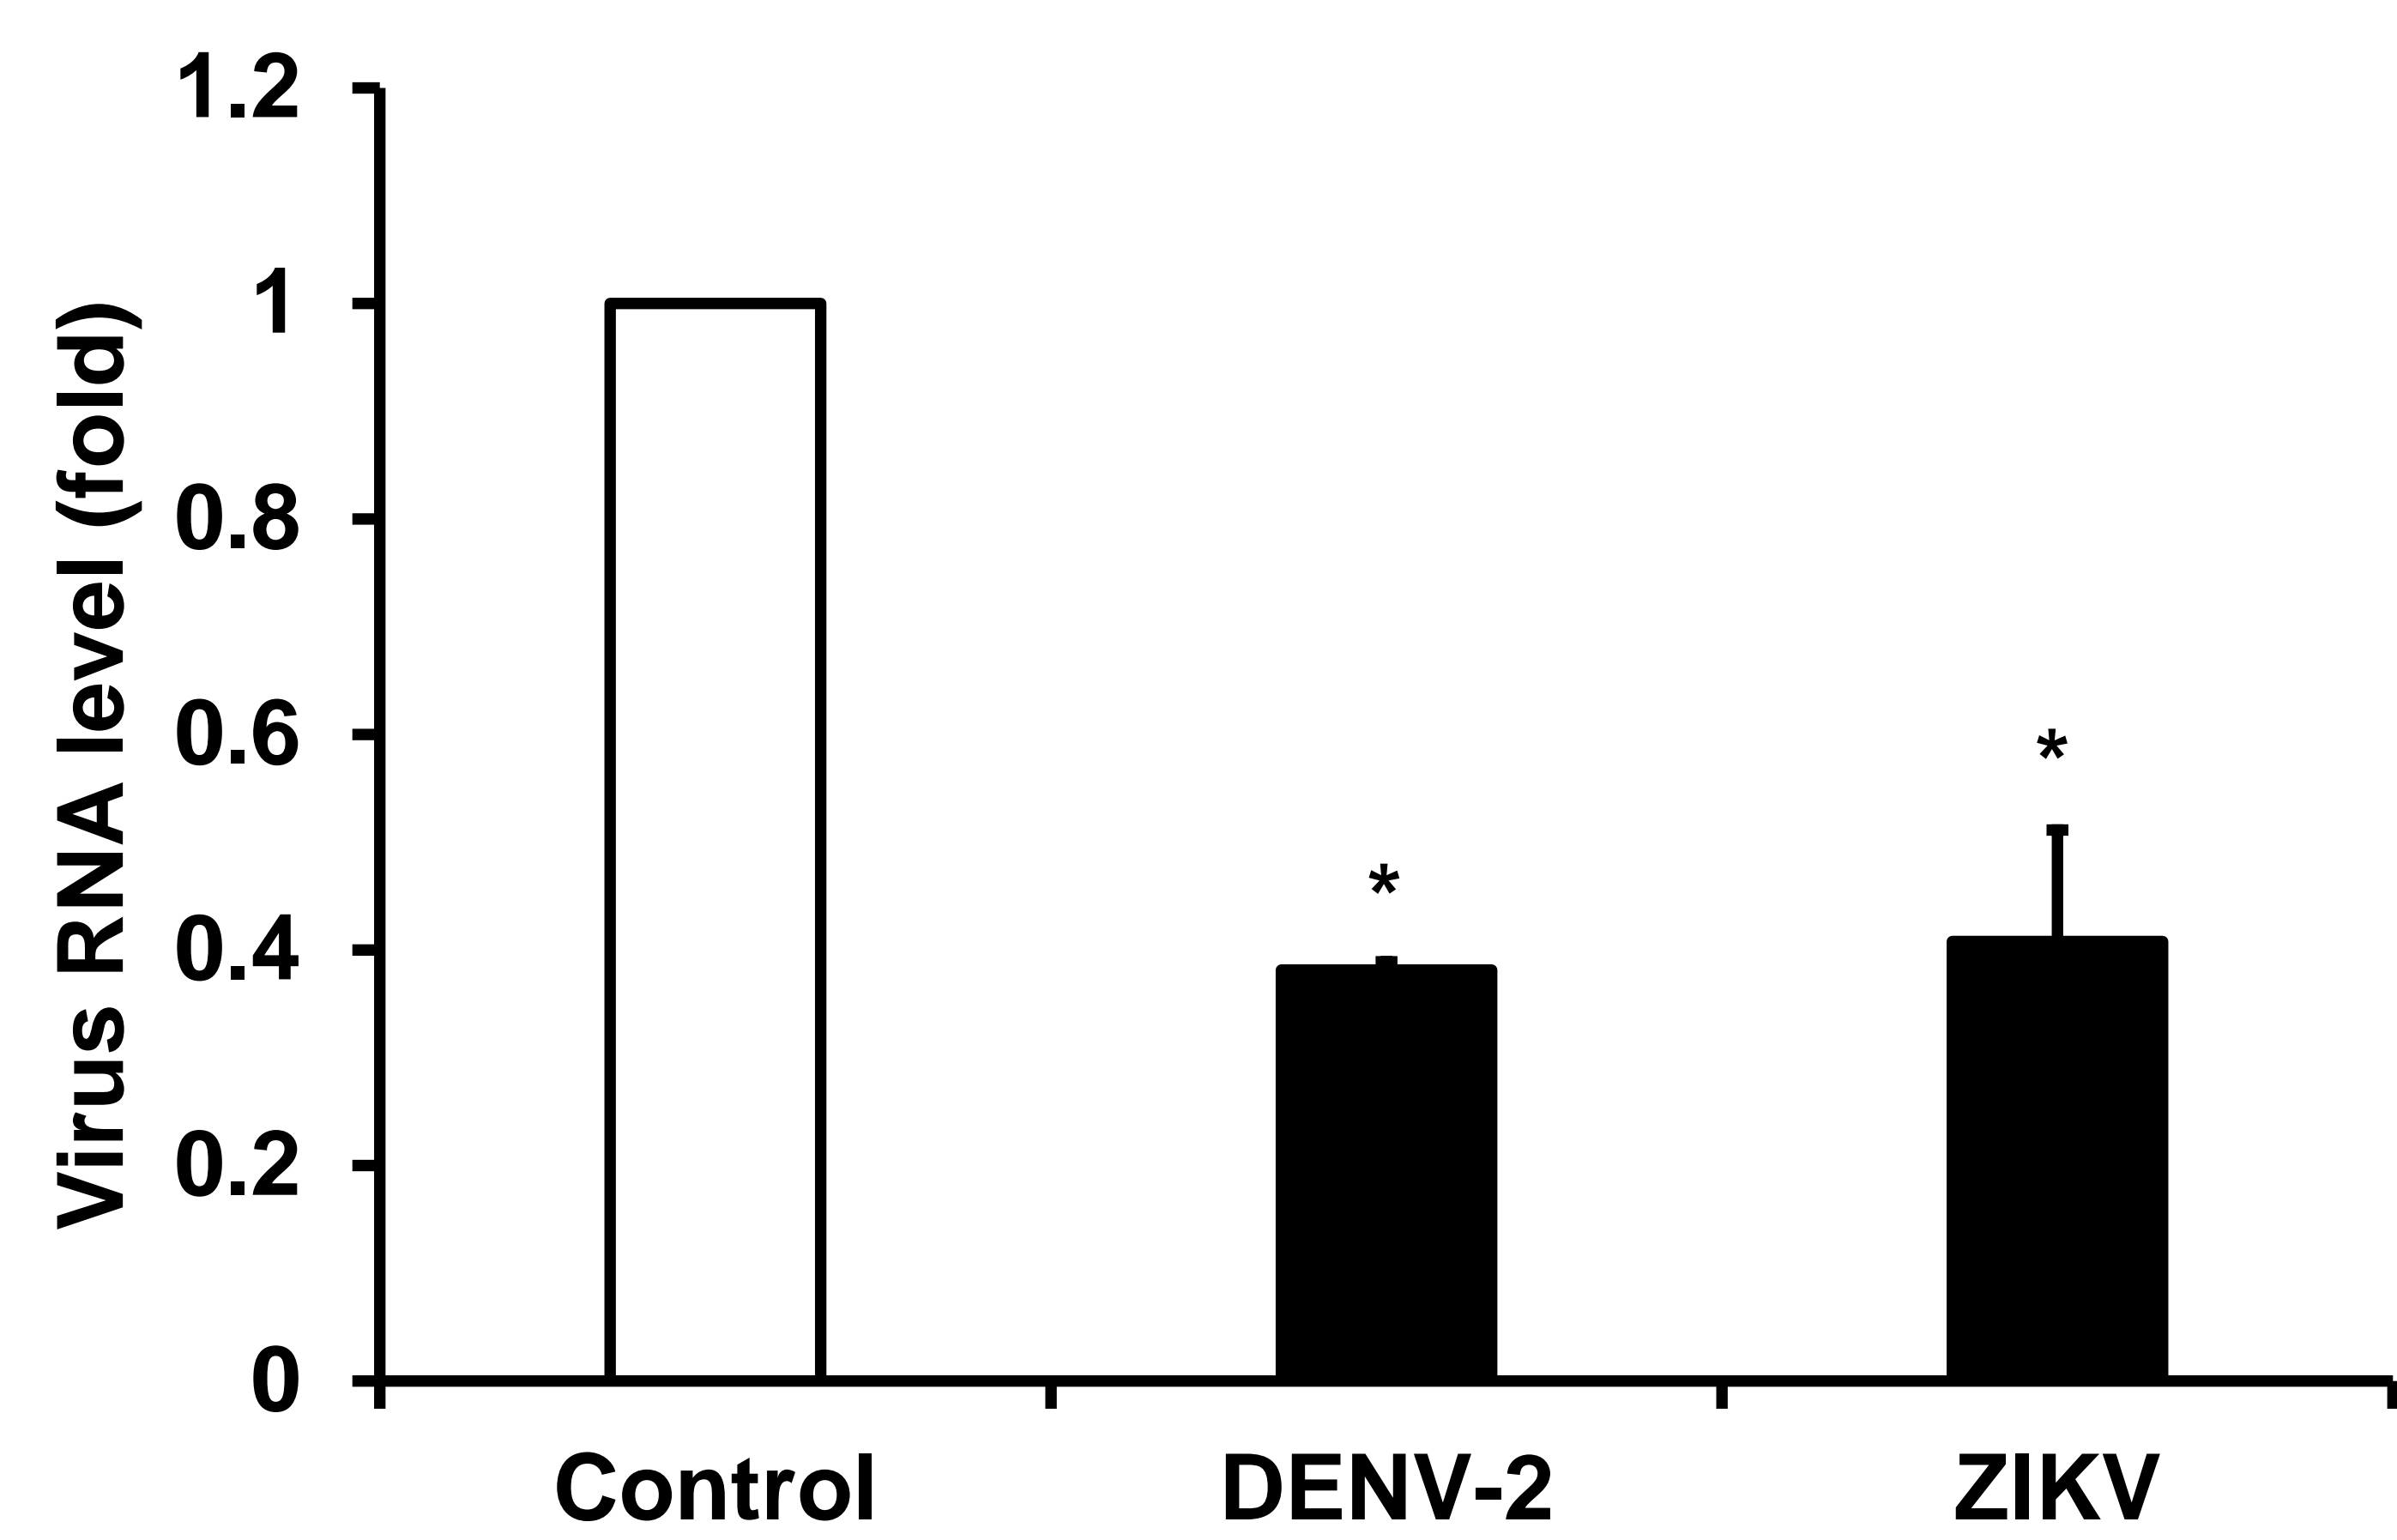**E**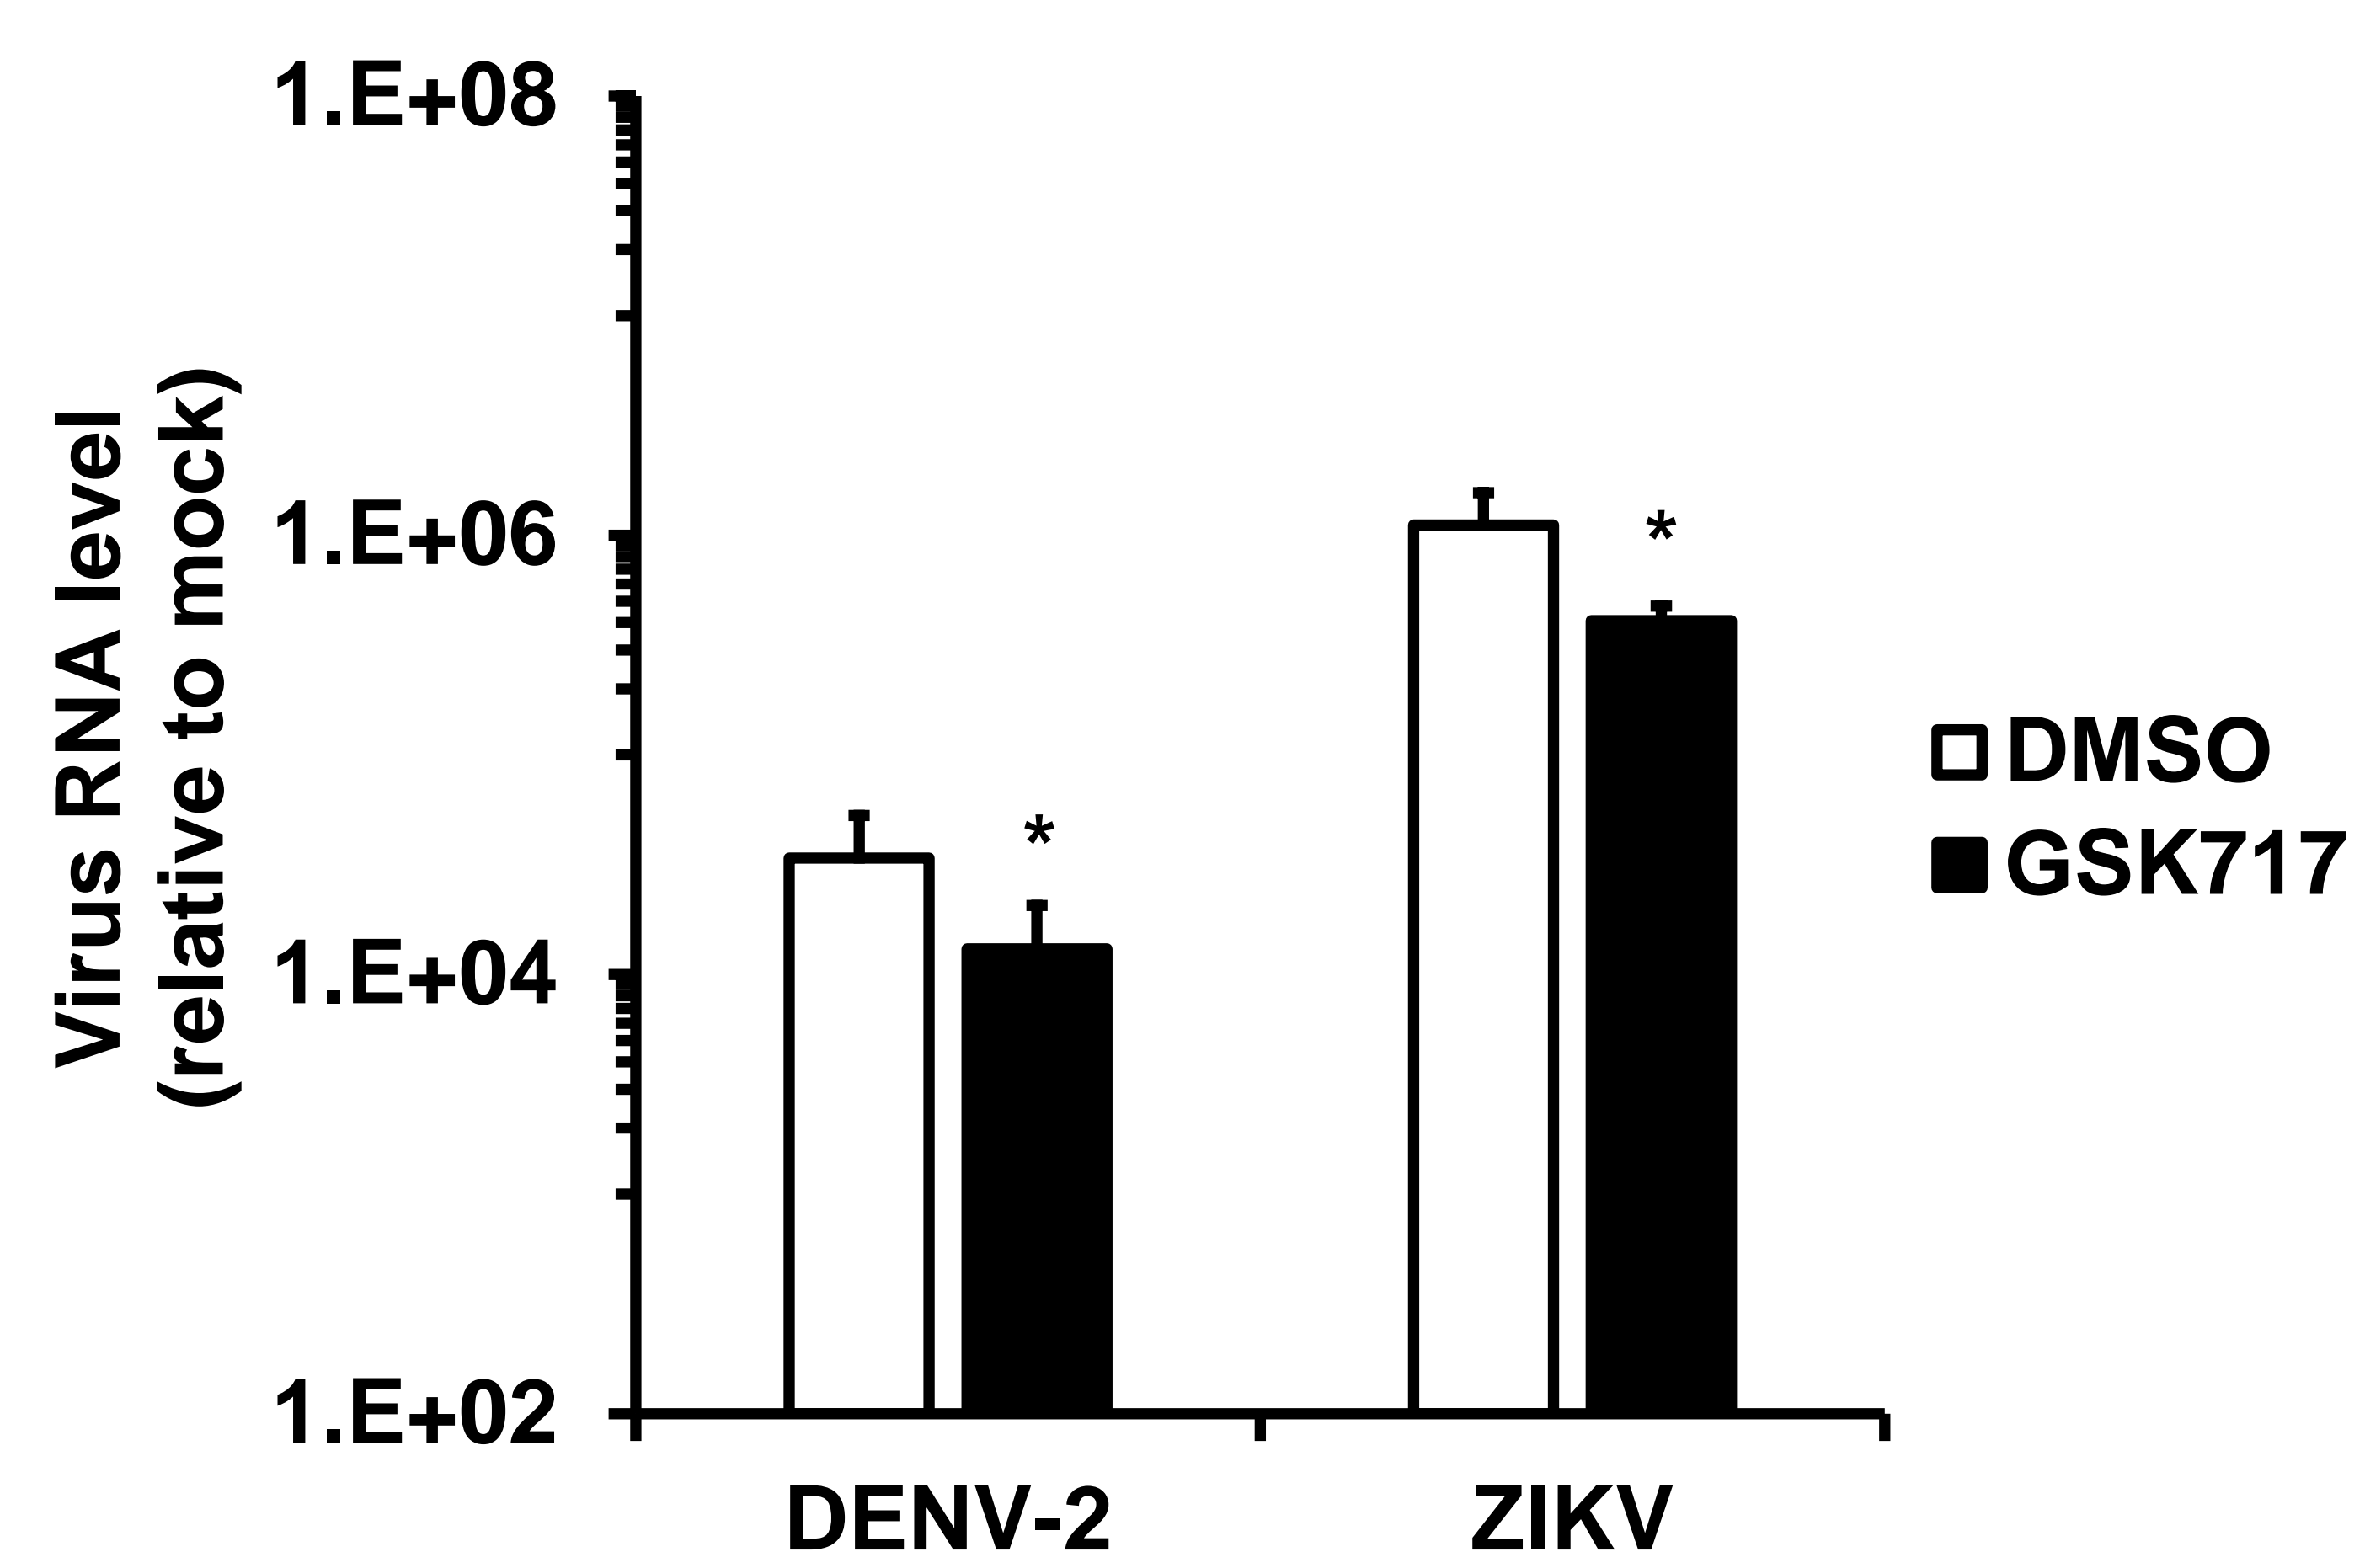

**FIG 6****A**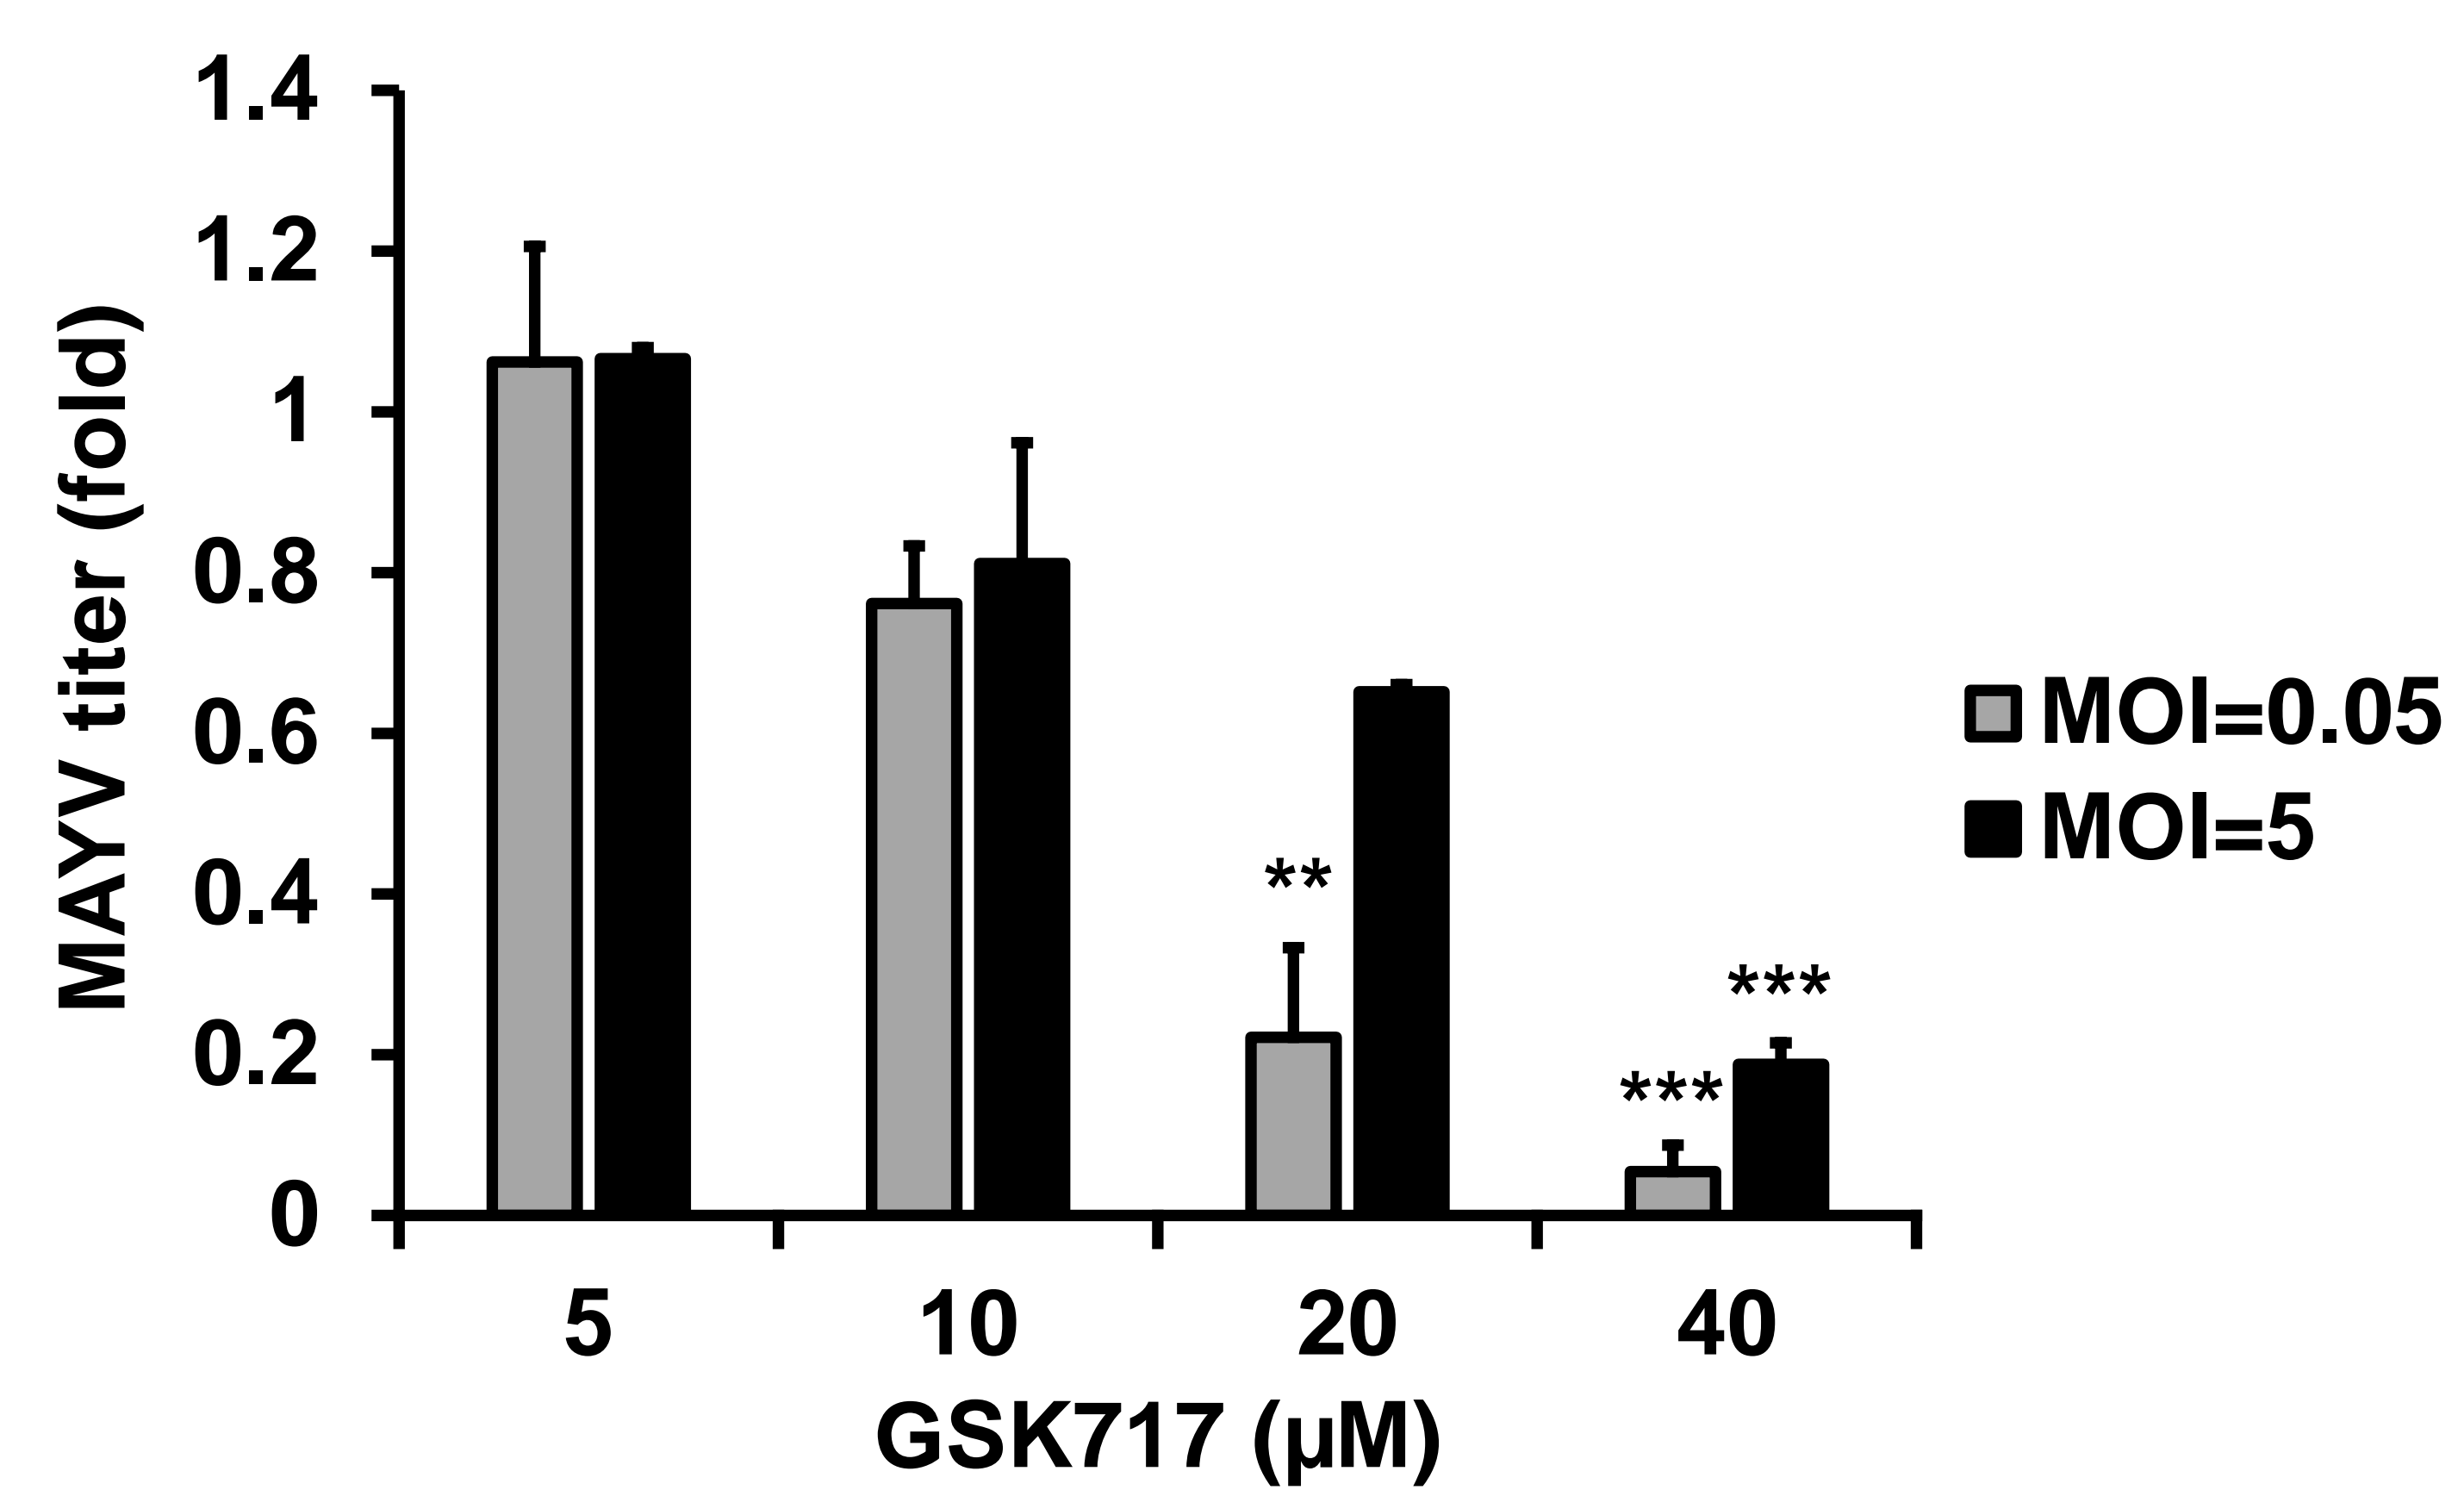**B**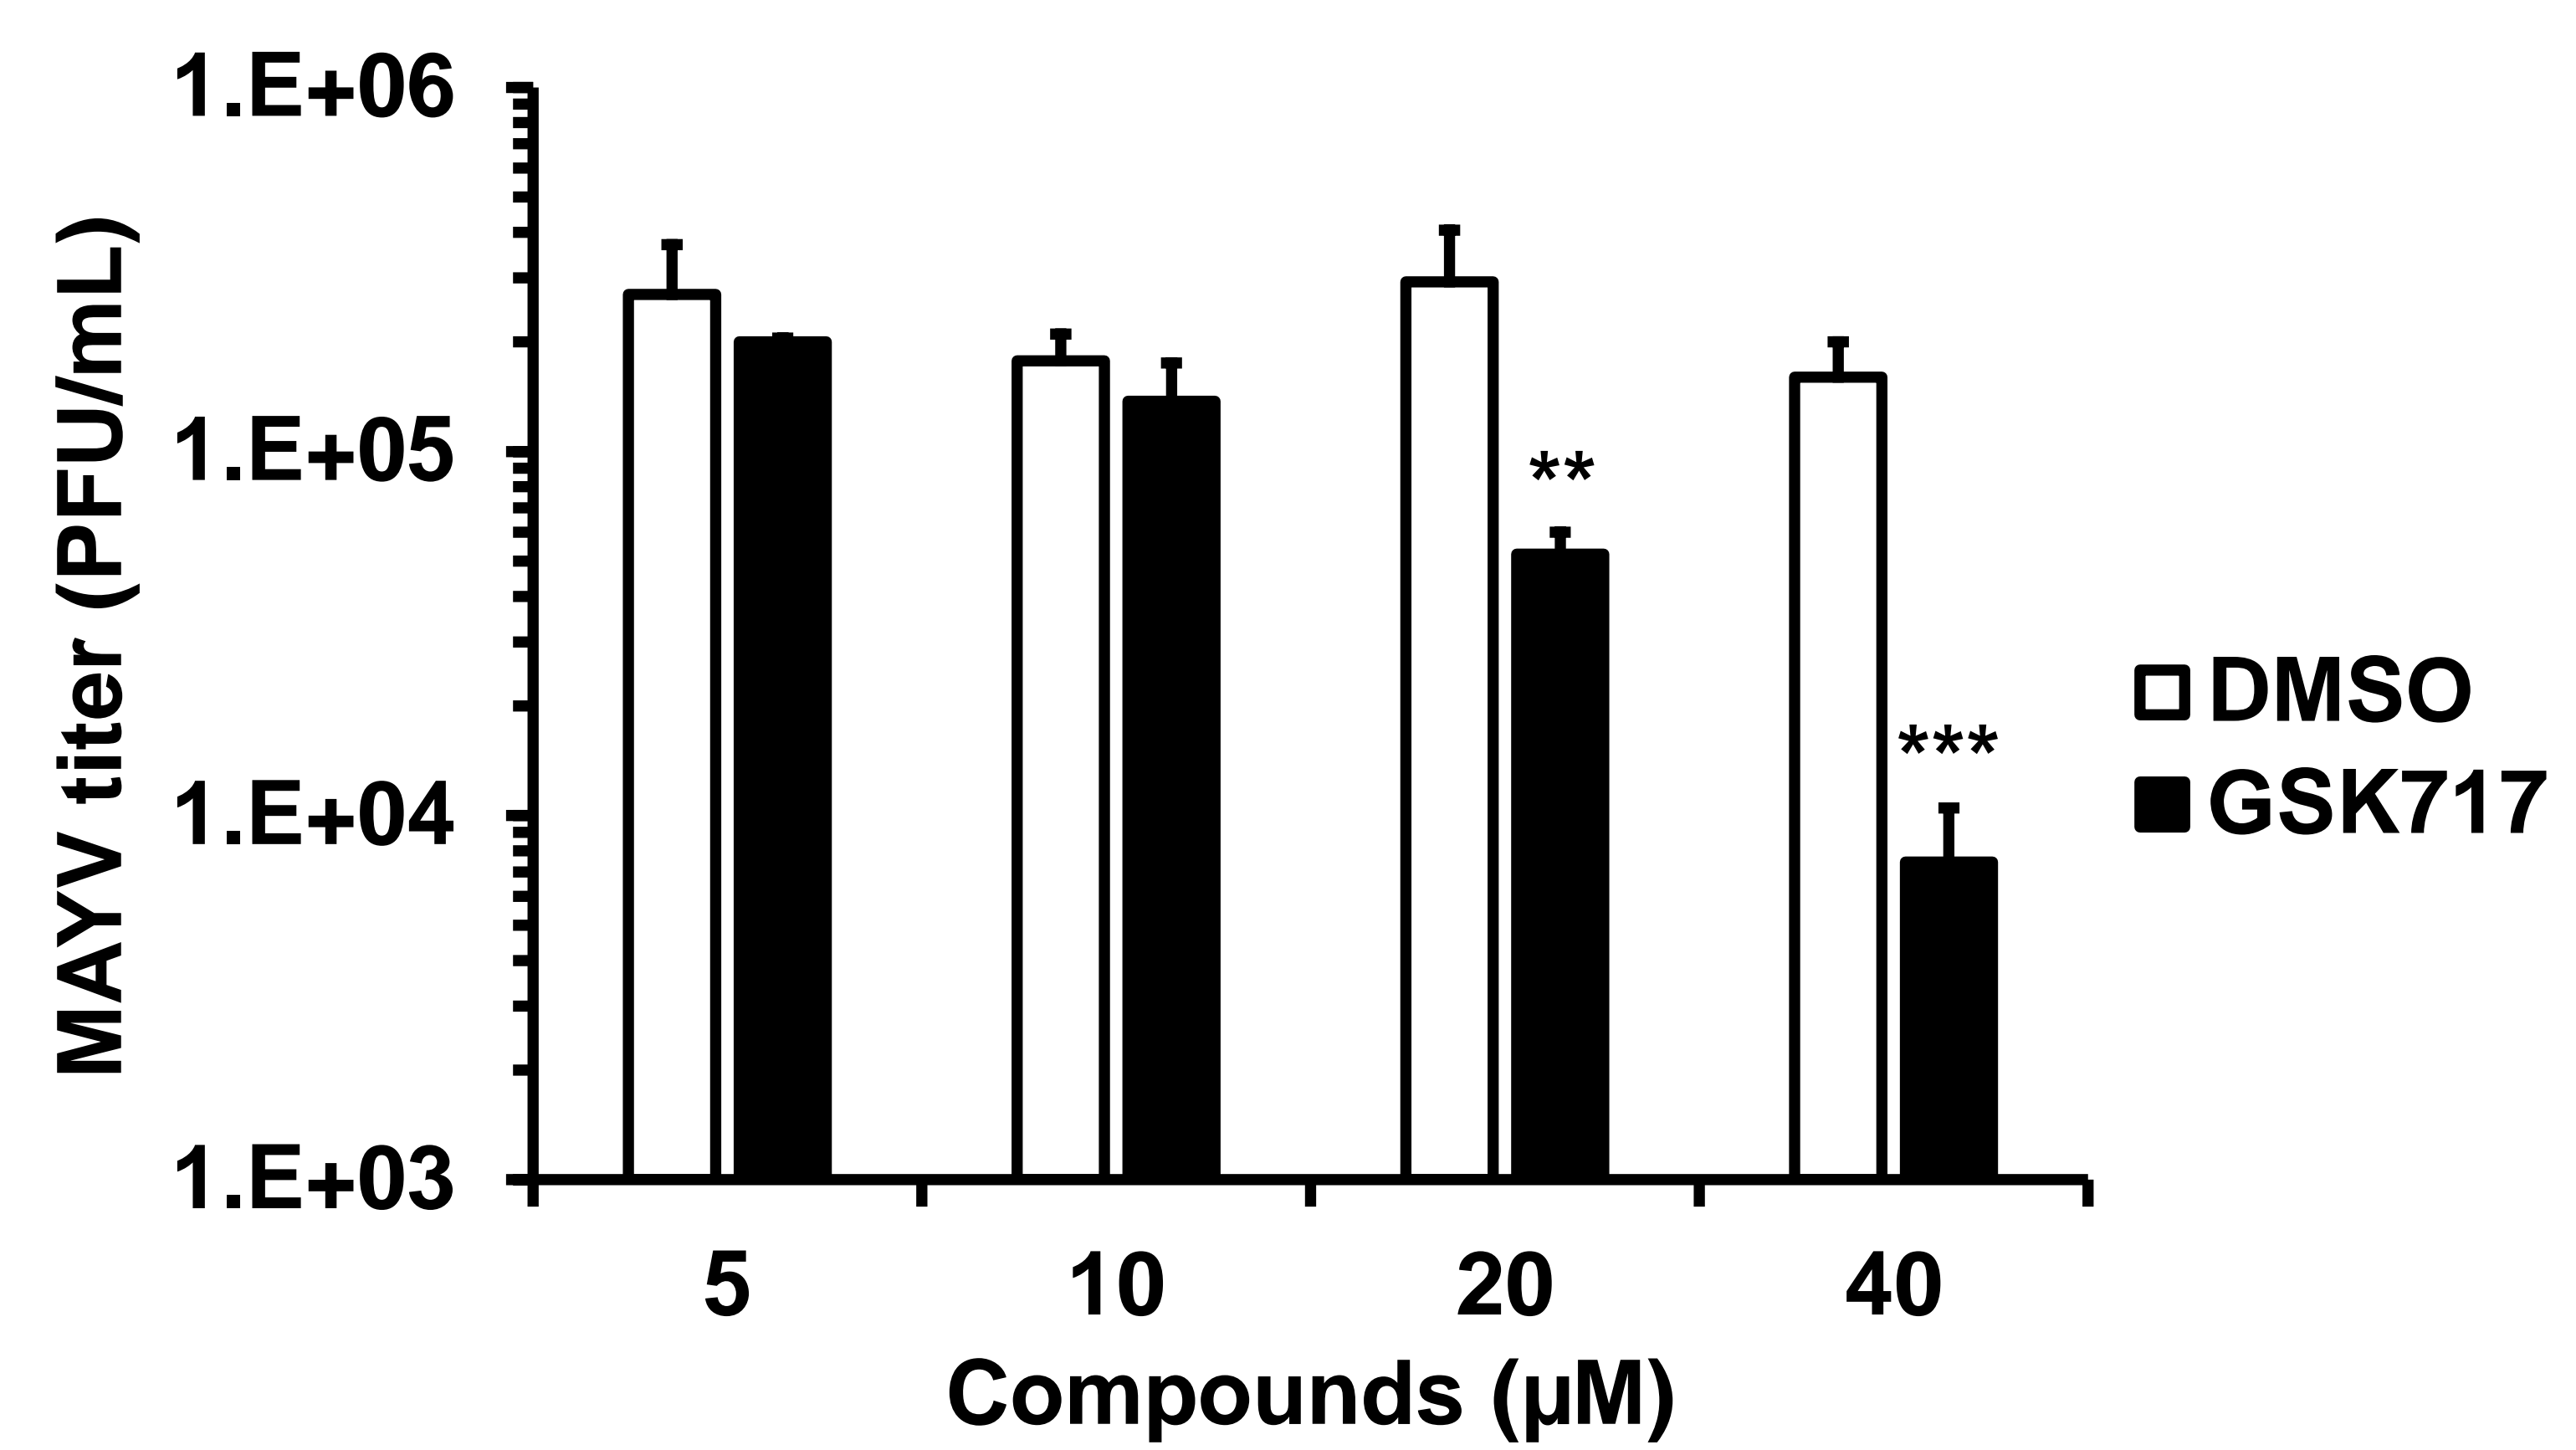**C**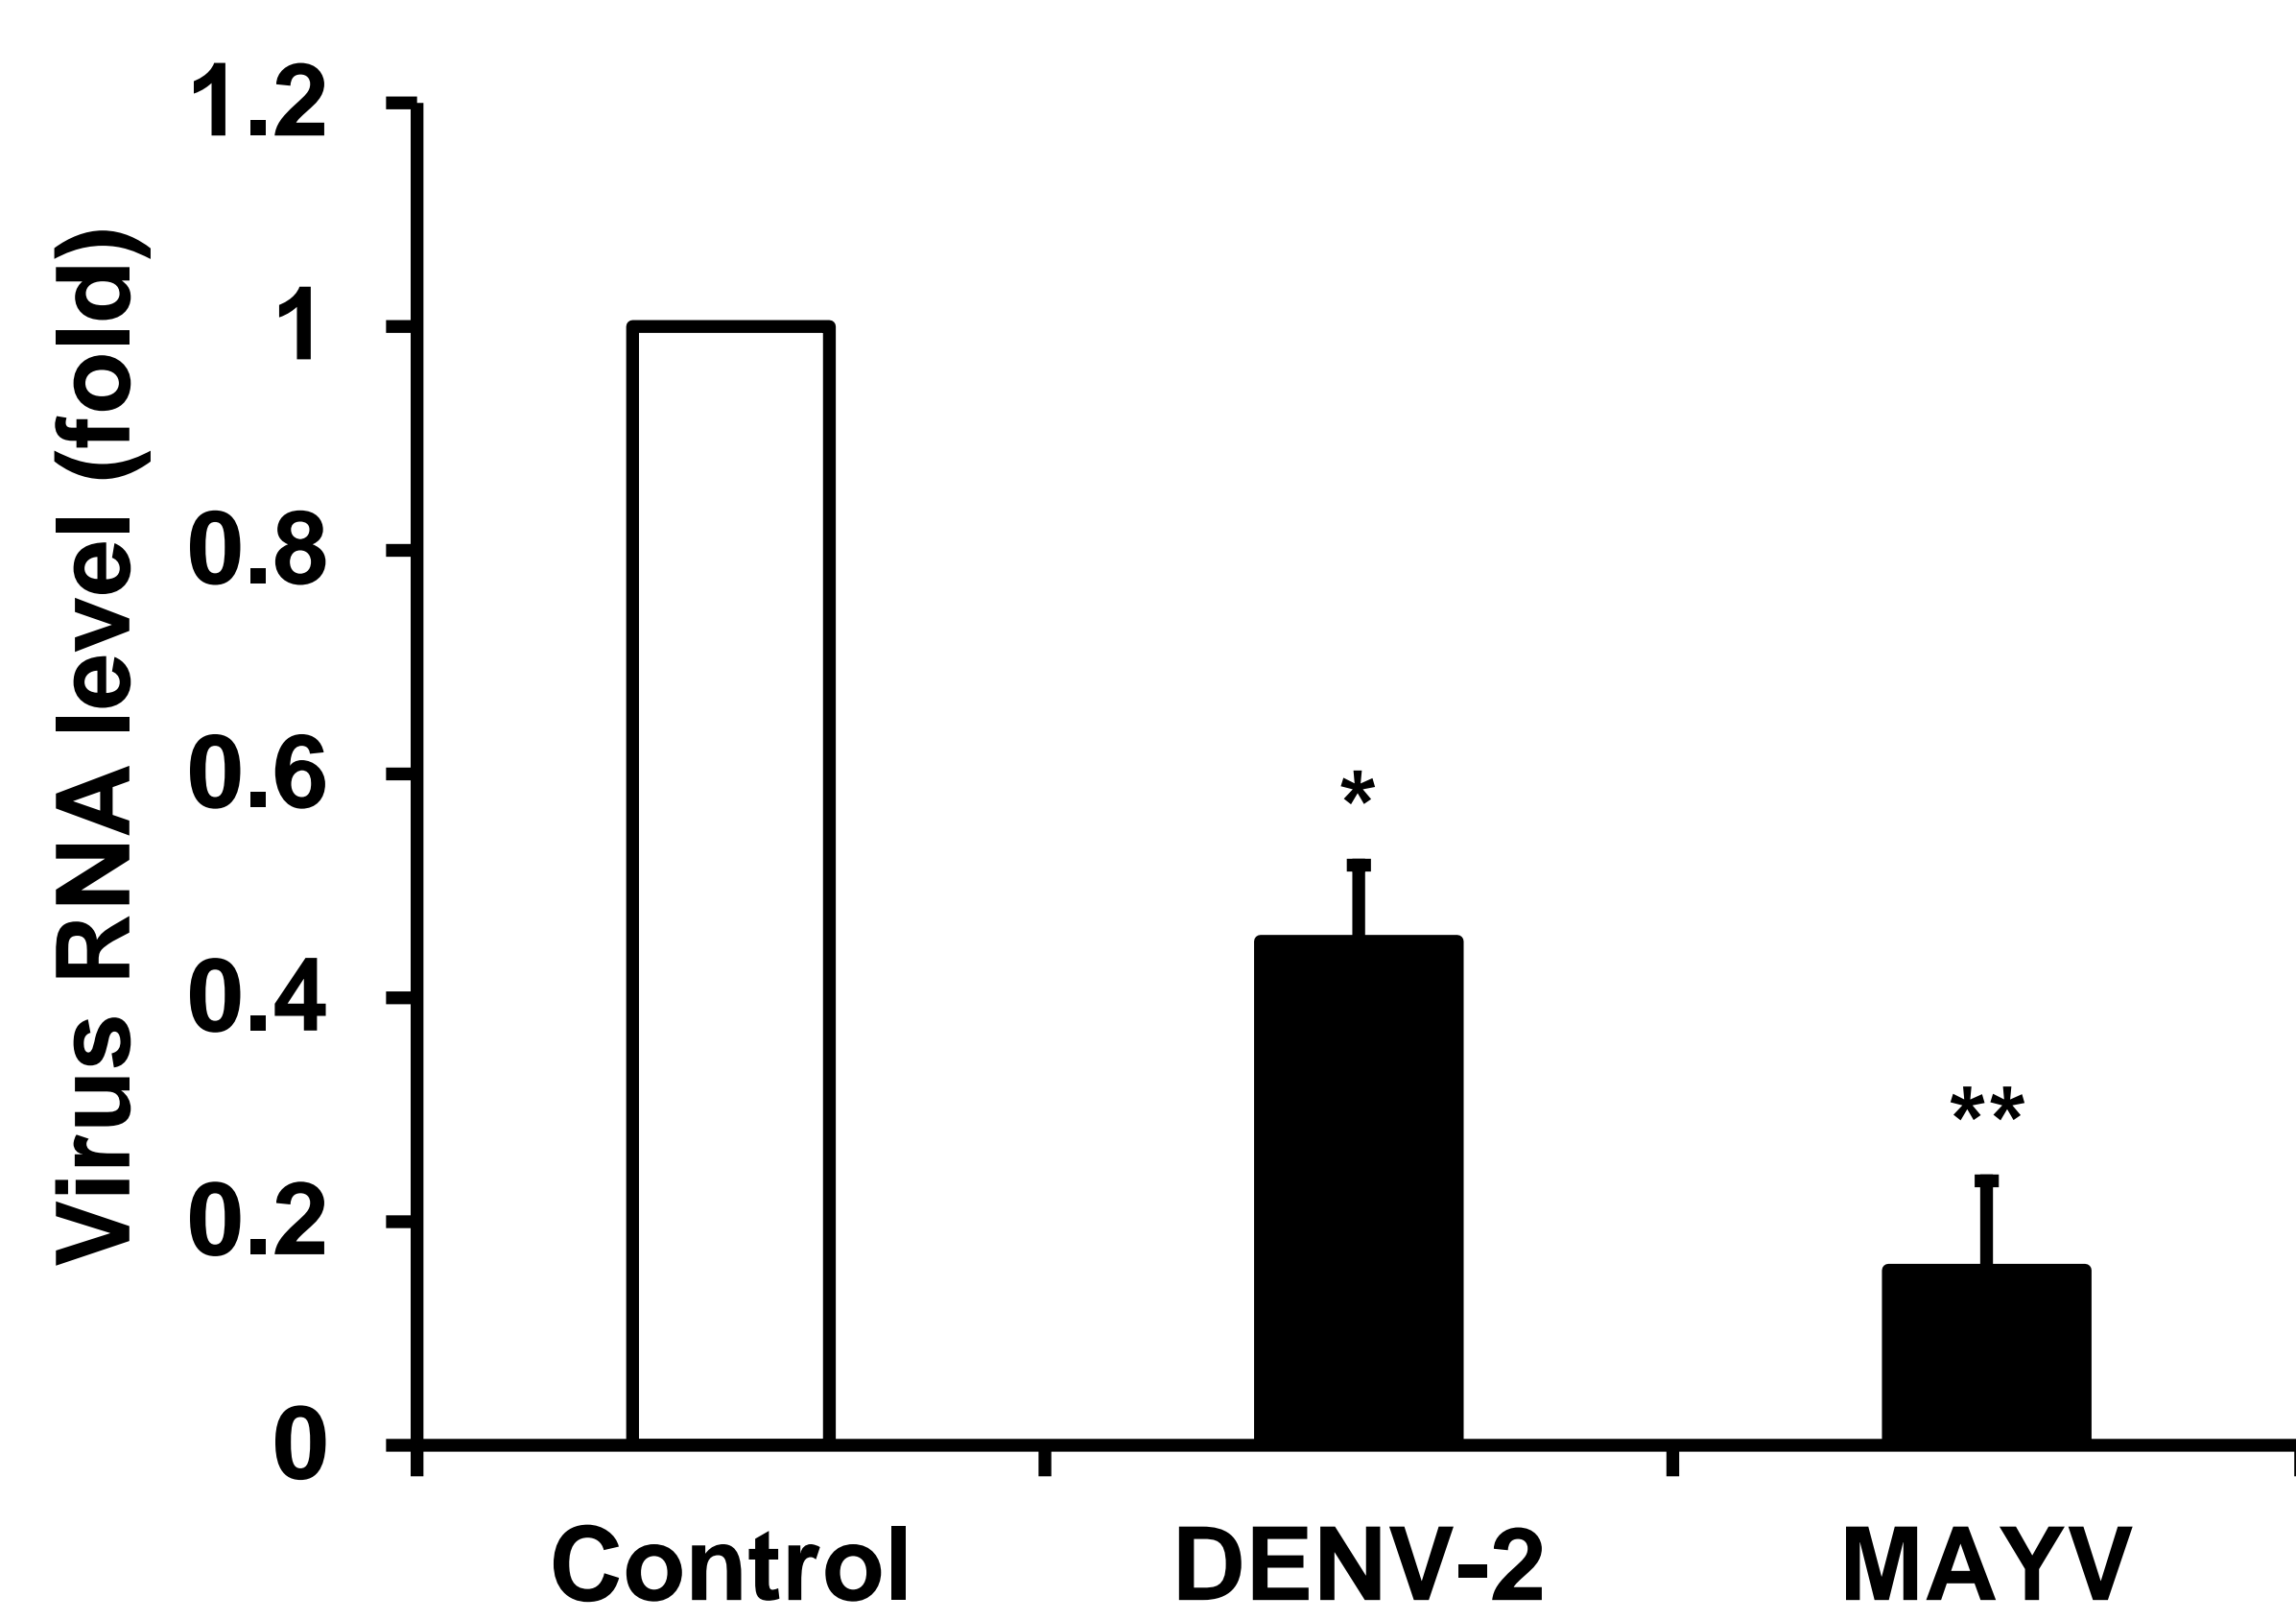**D**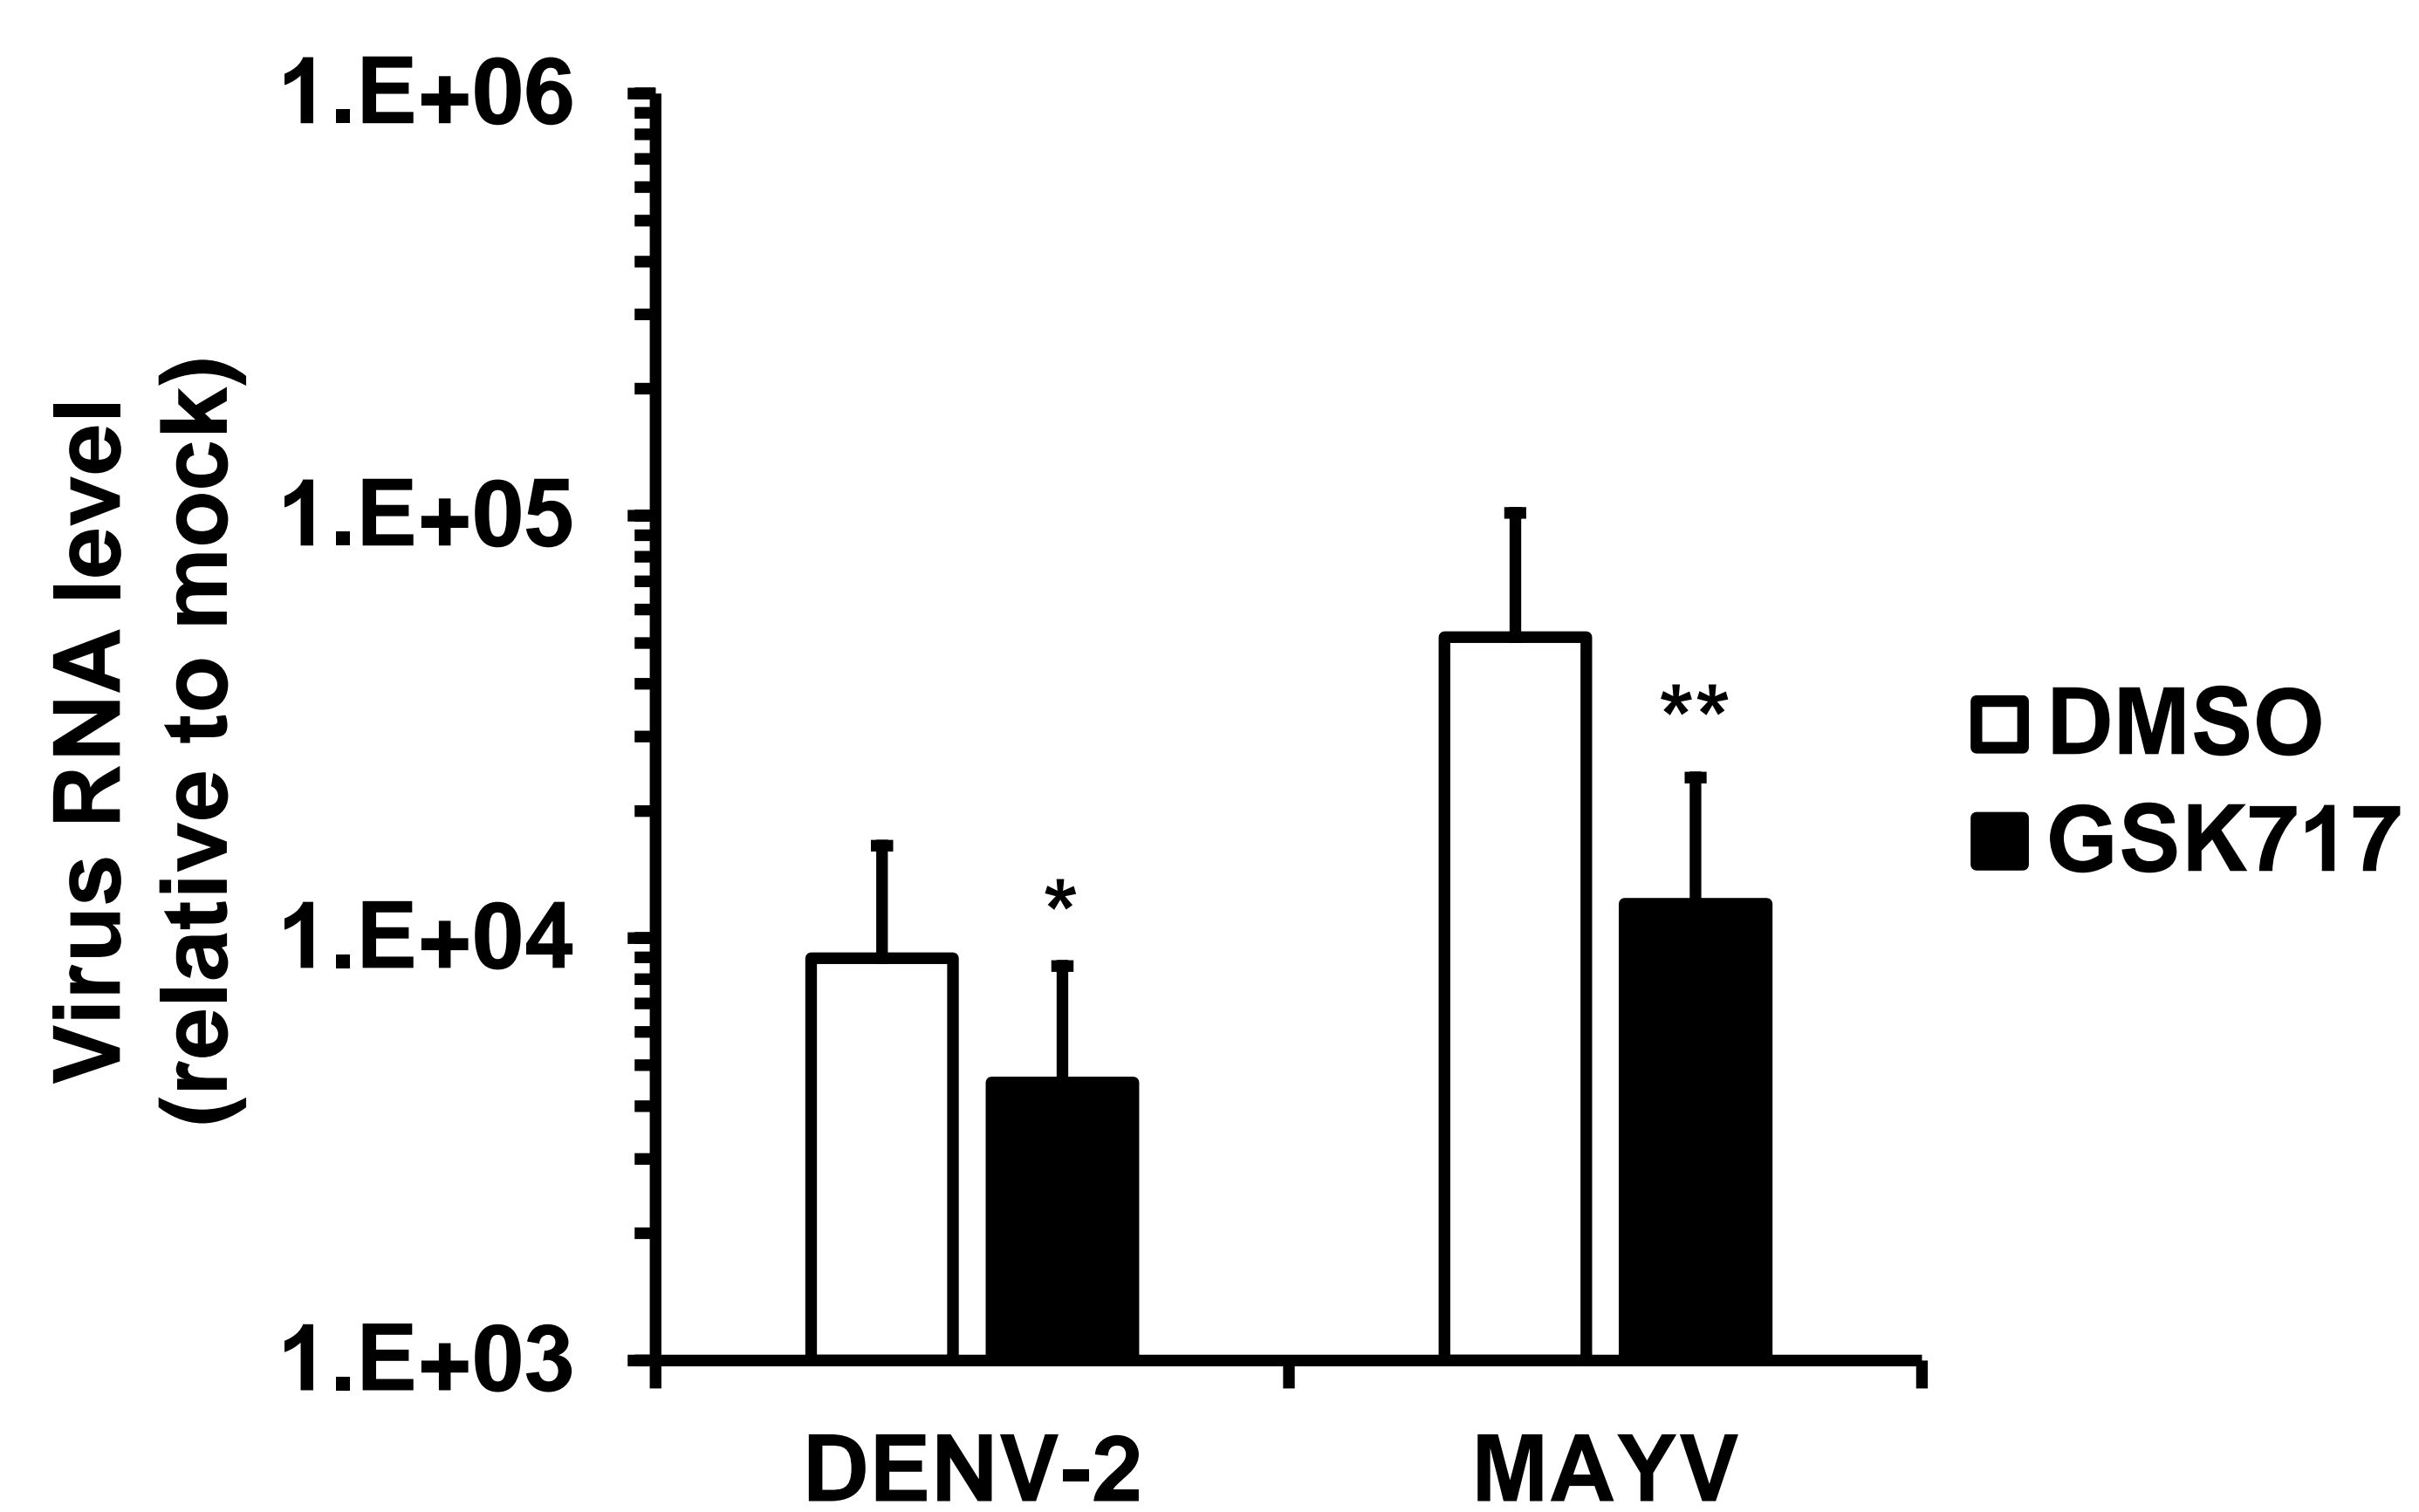**E**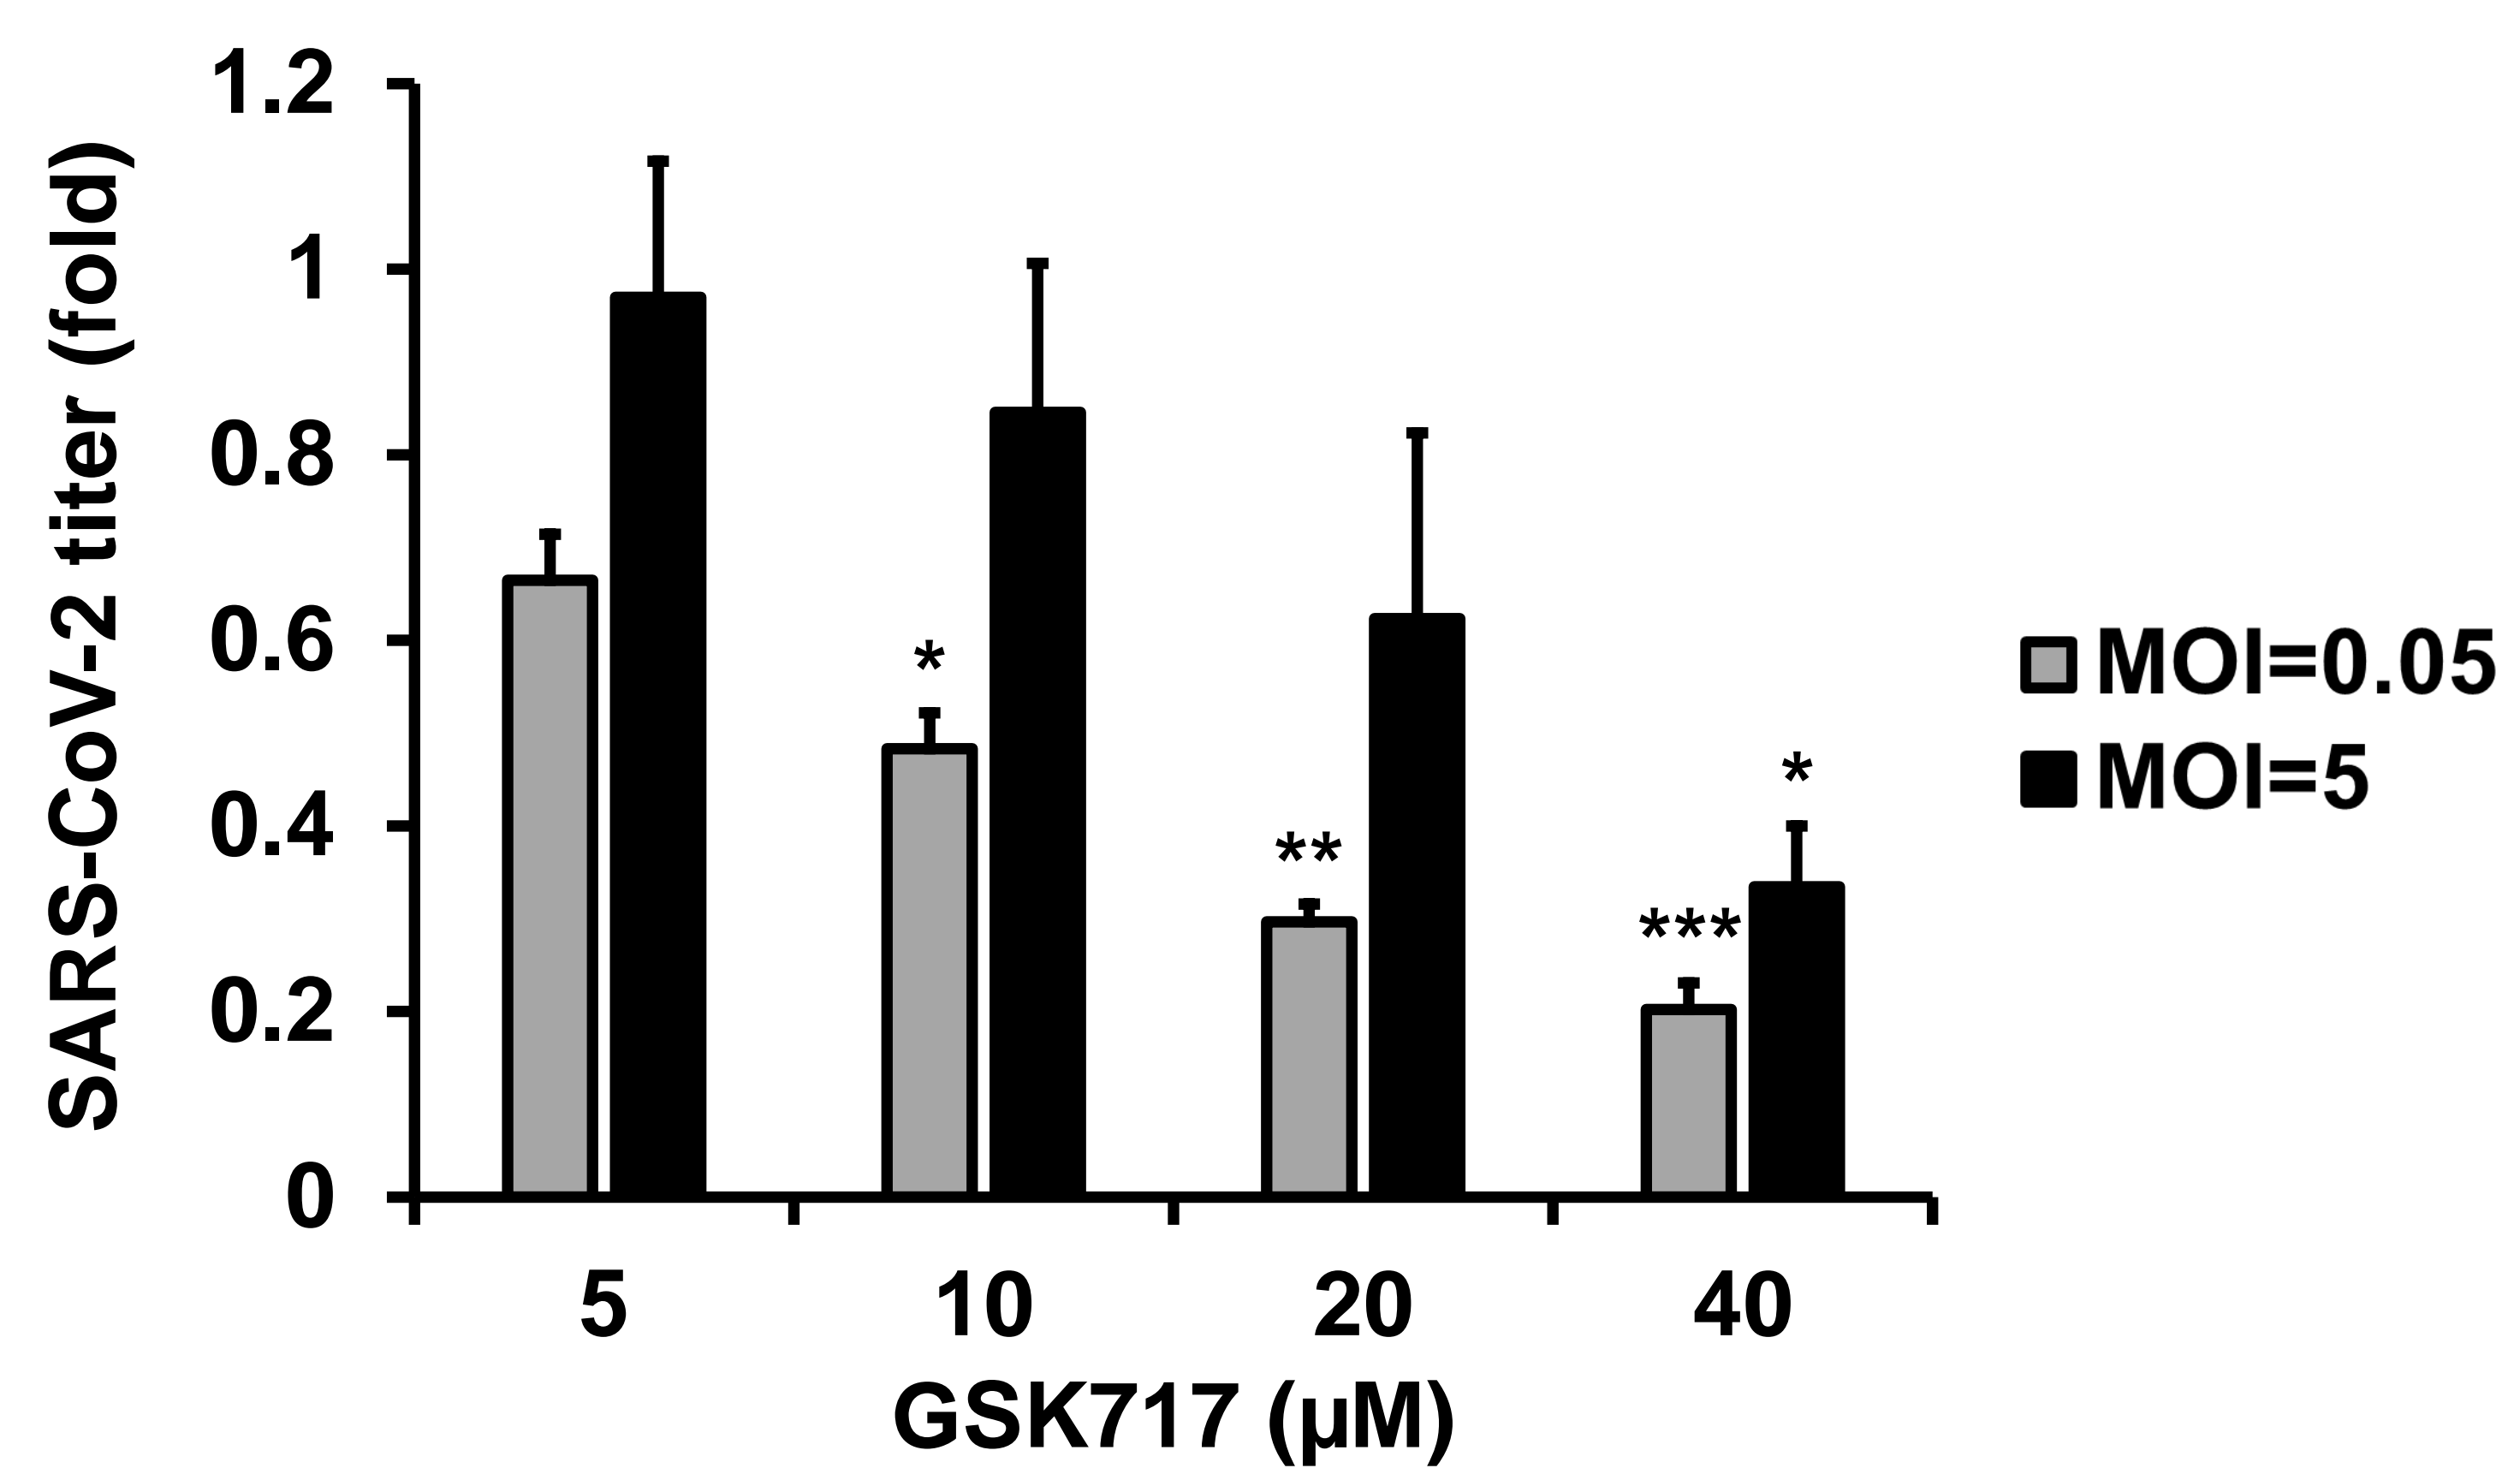**F**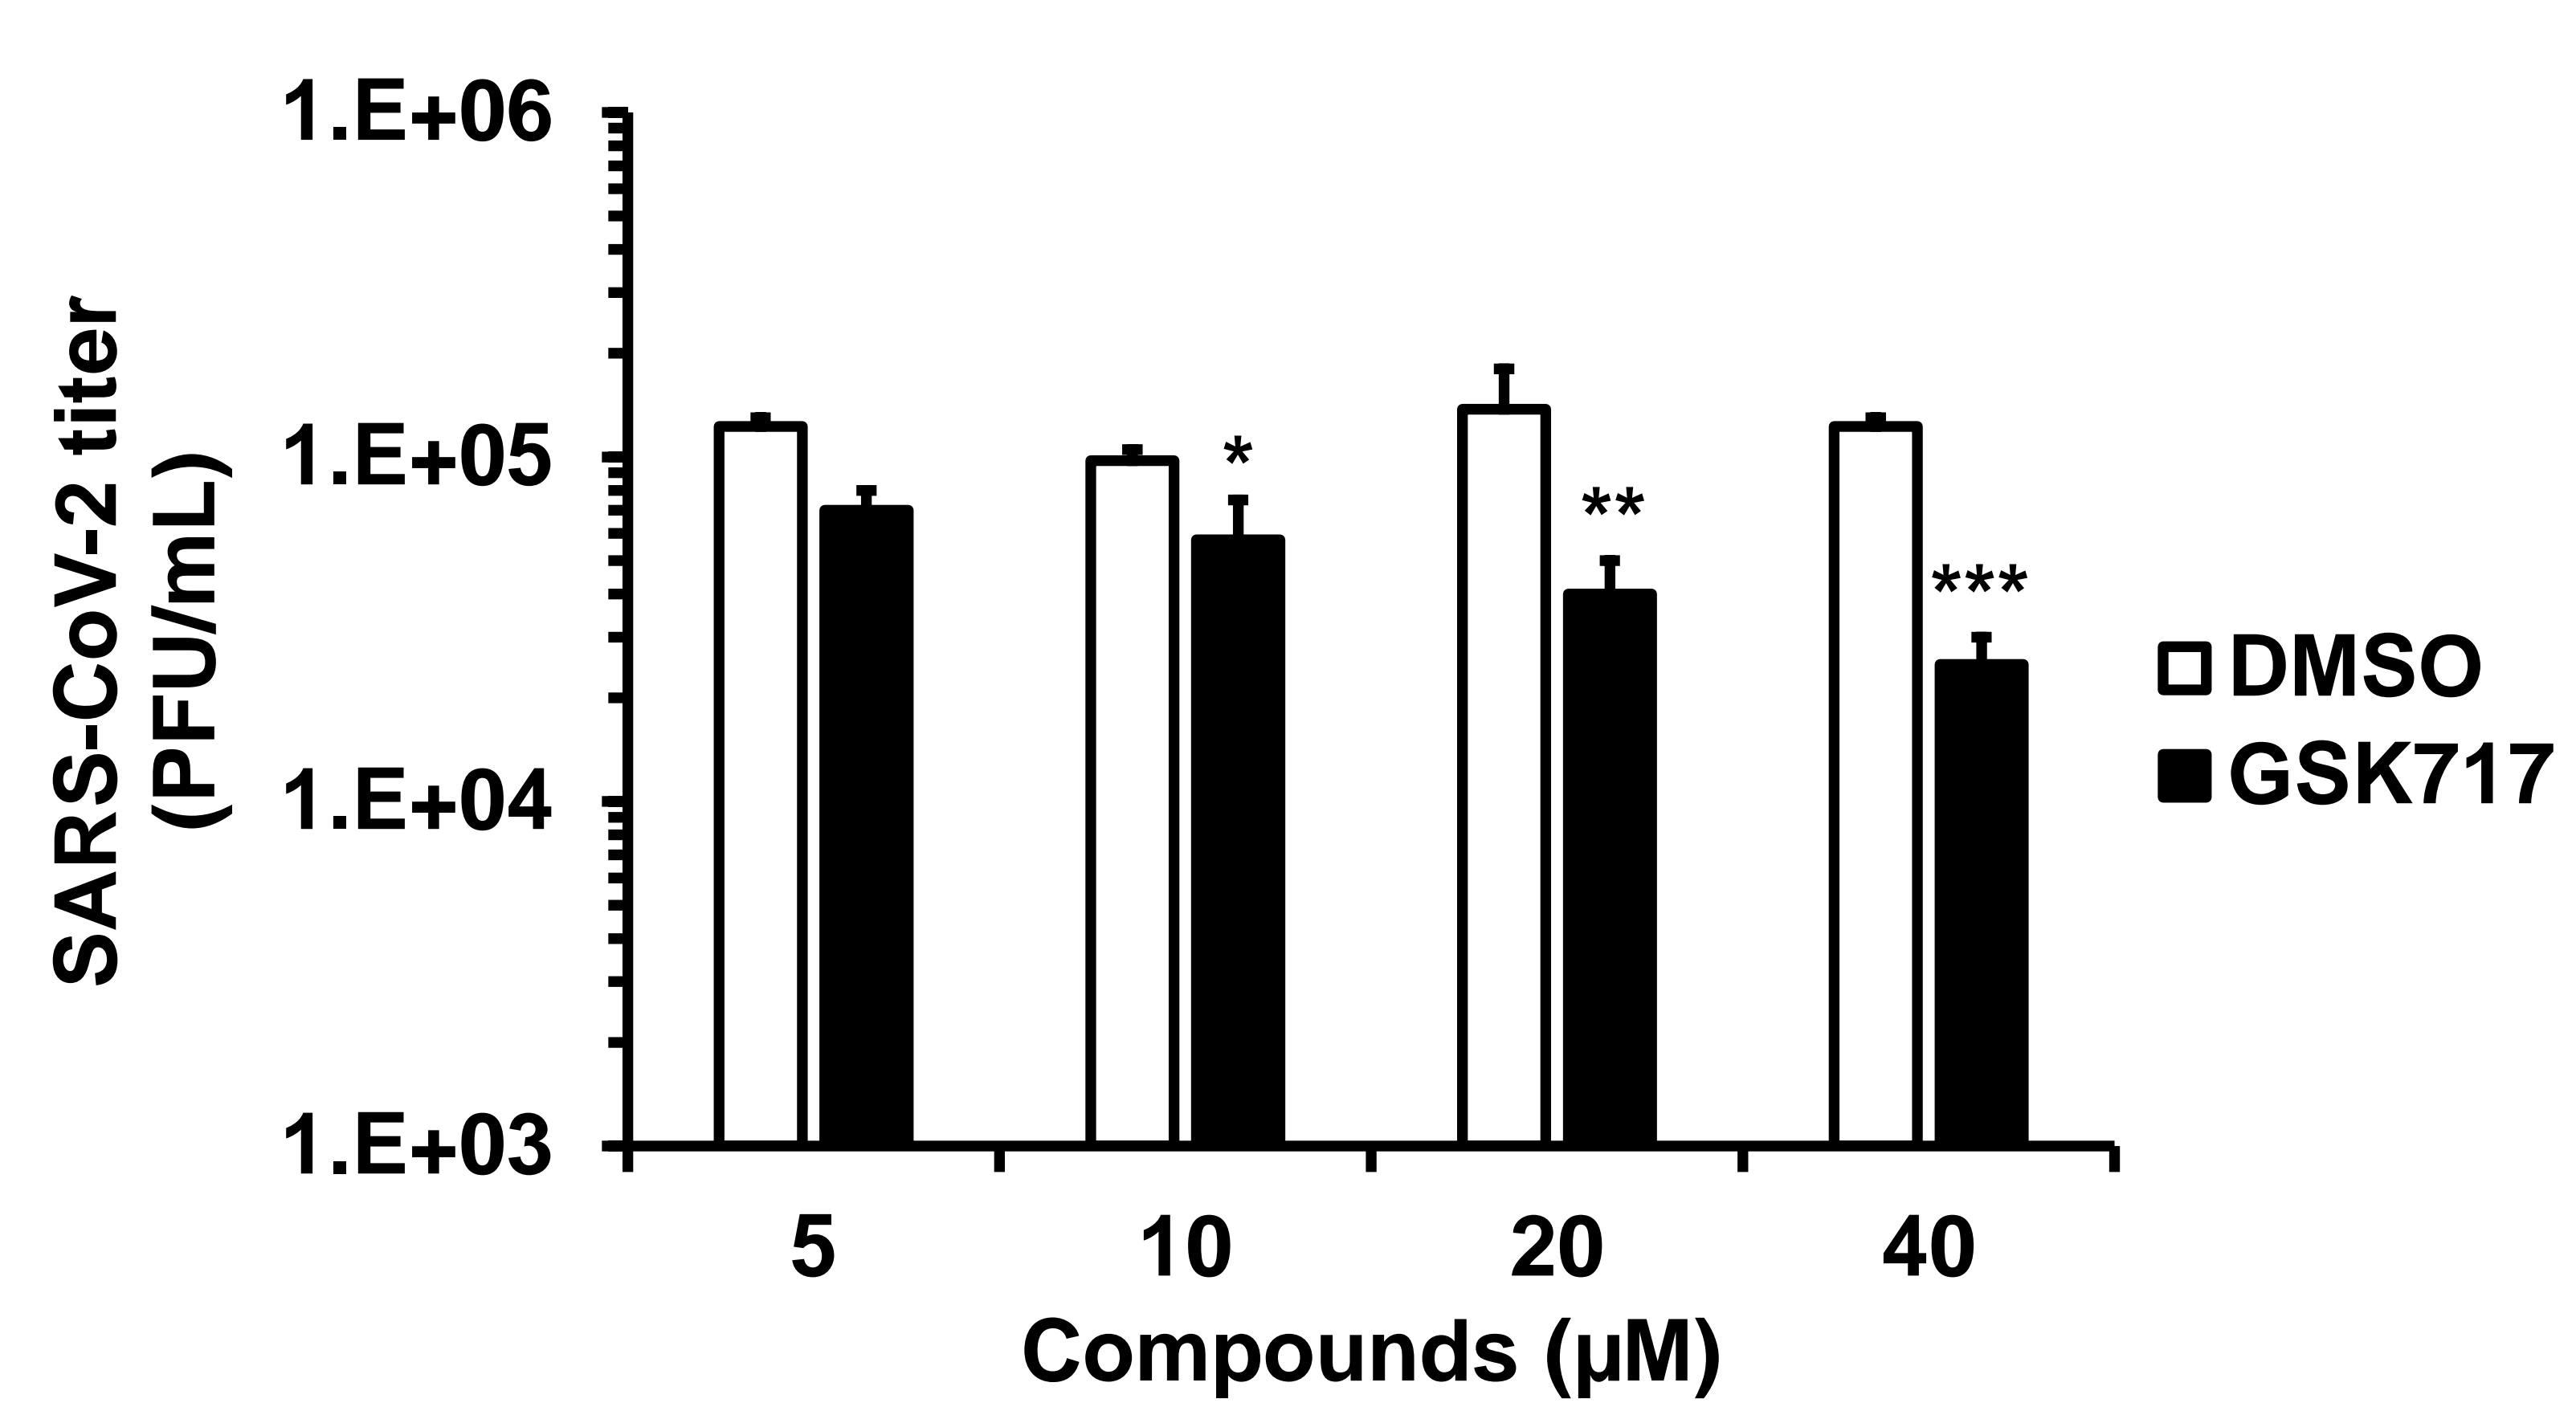



**FIG 7**

**A**

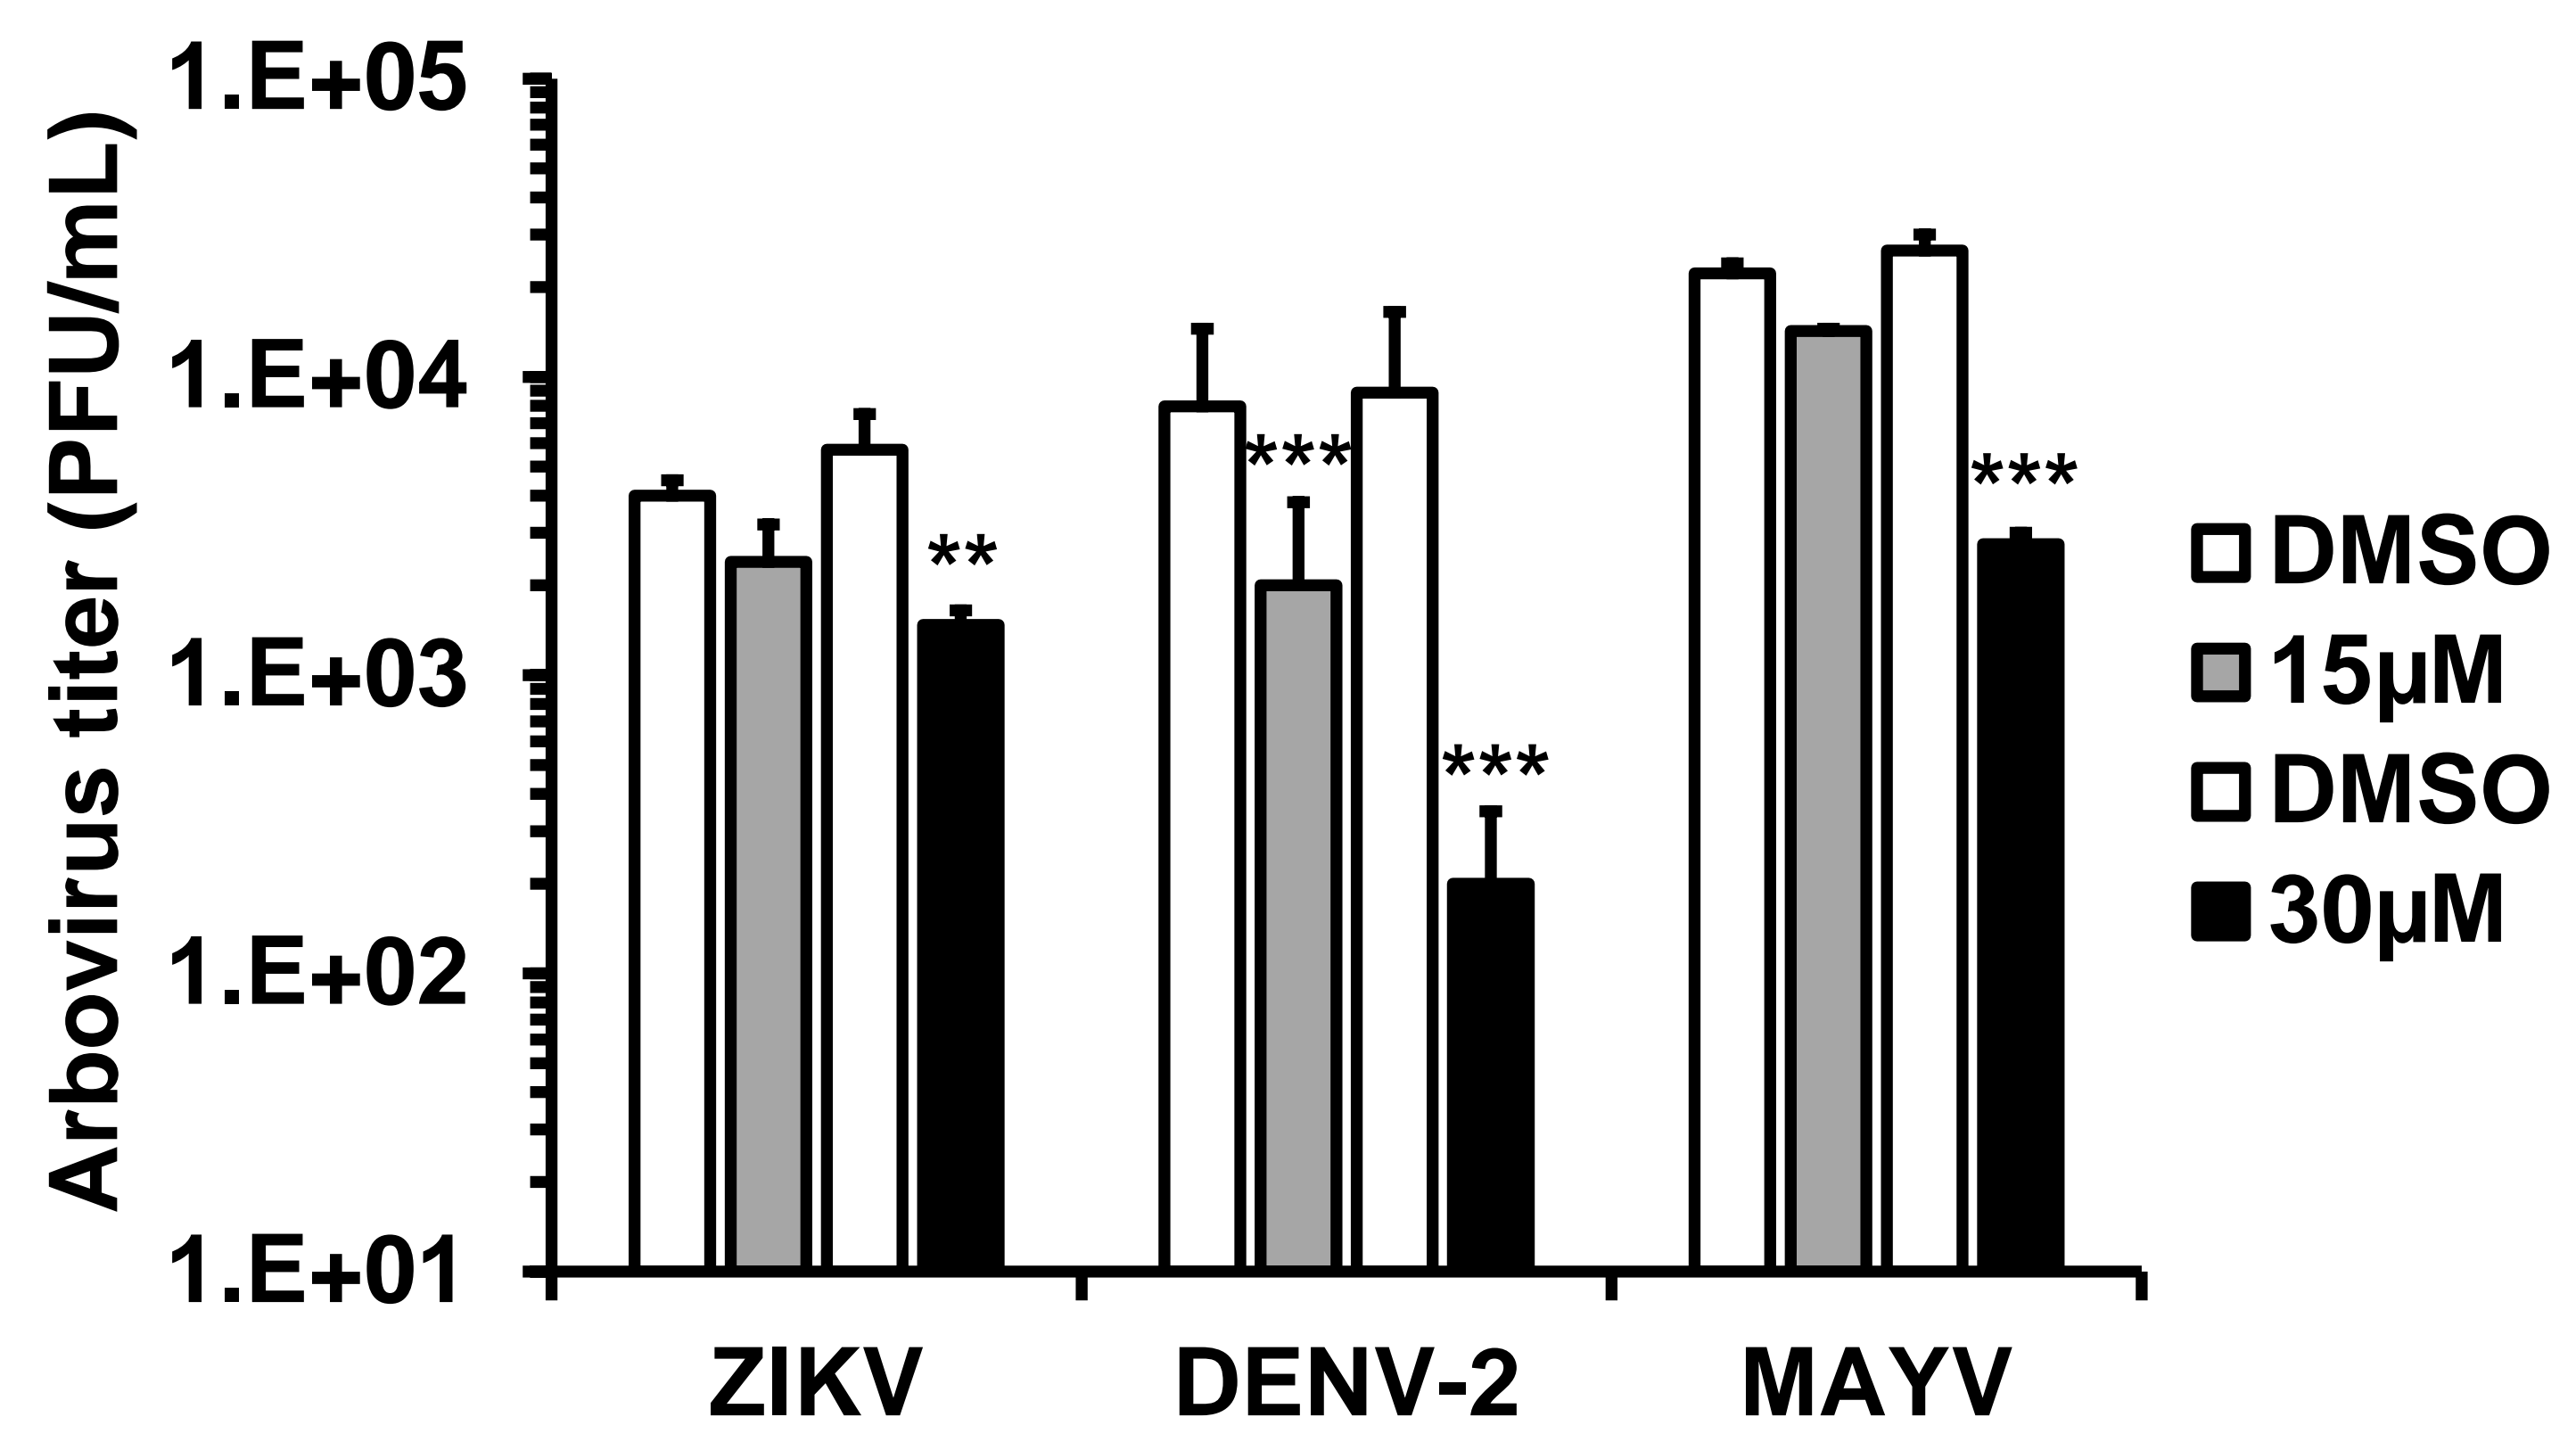

**B**

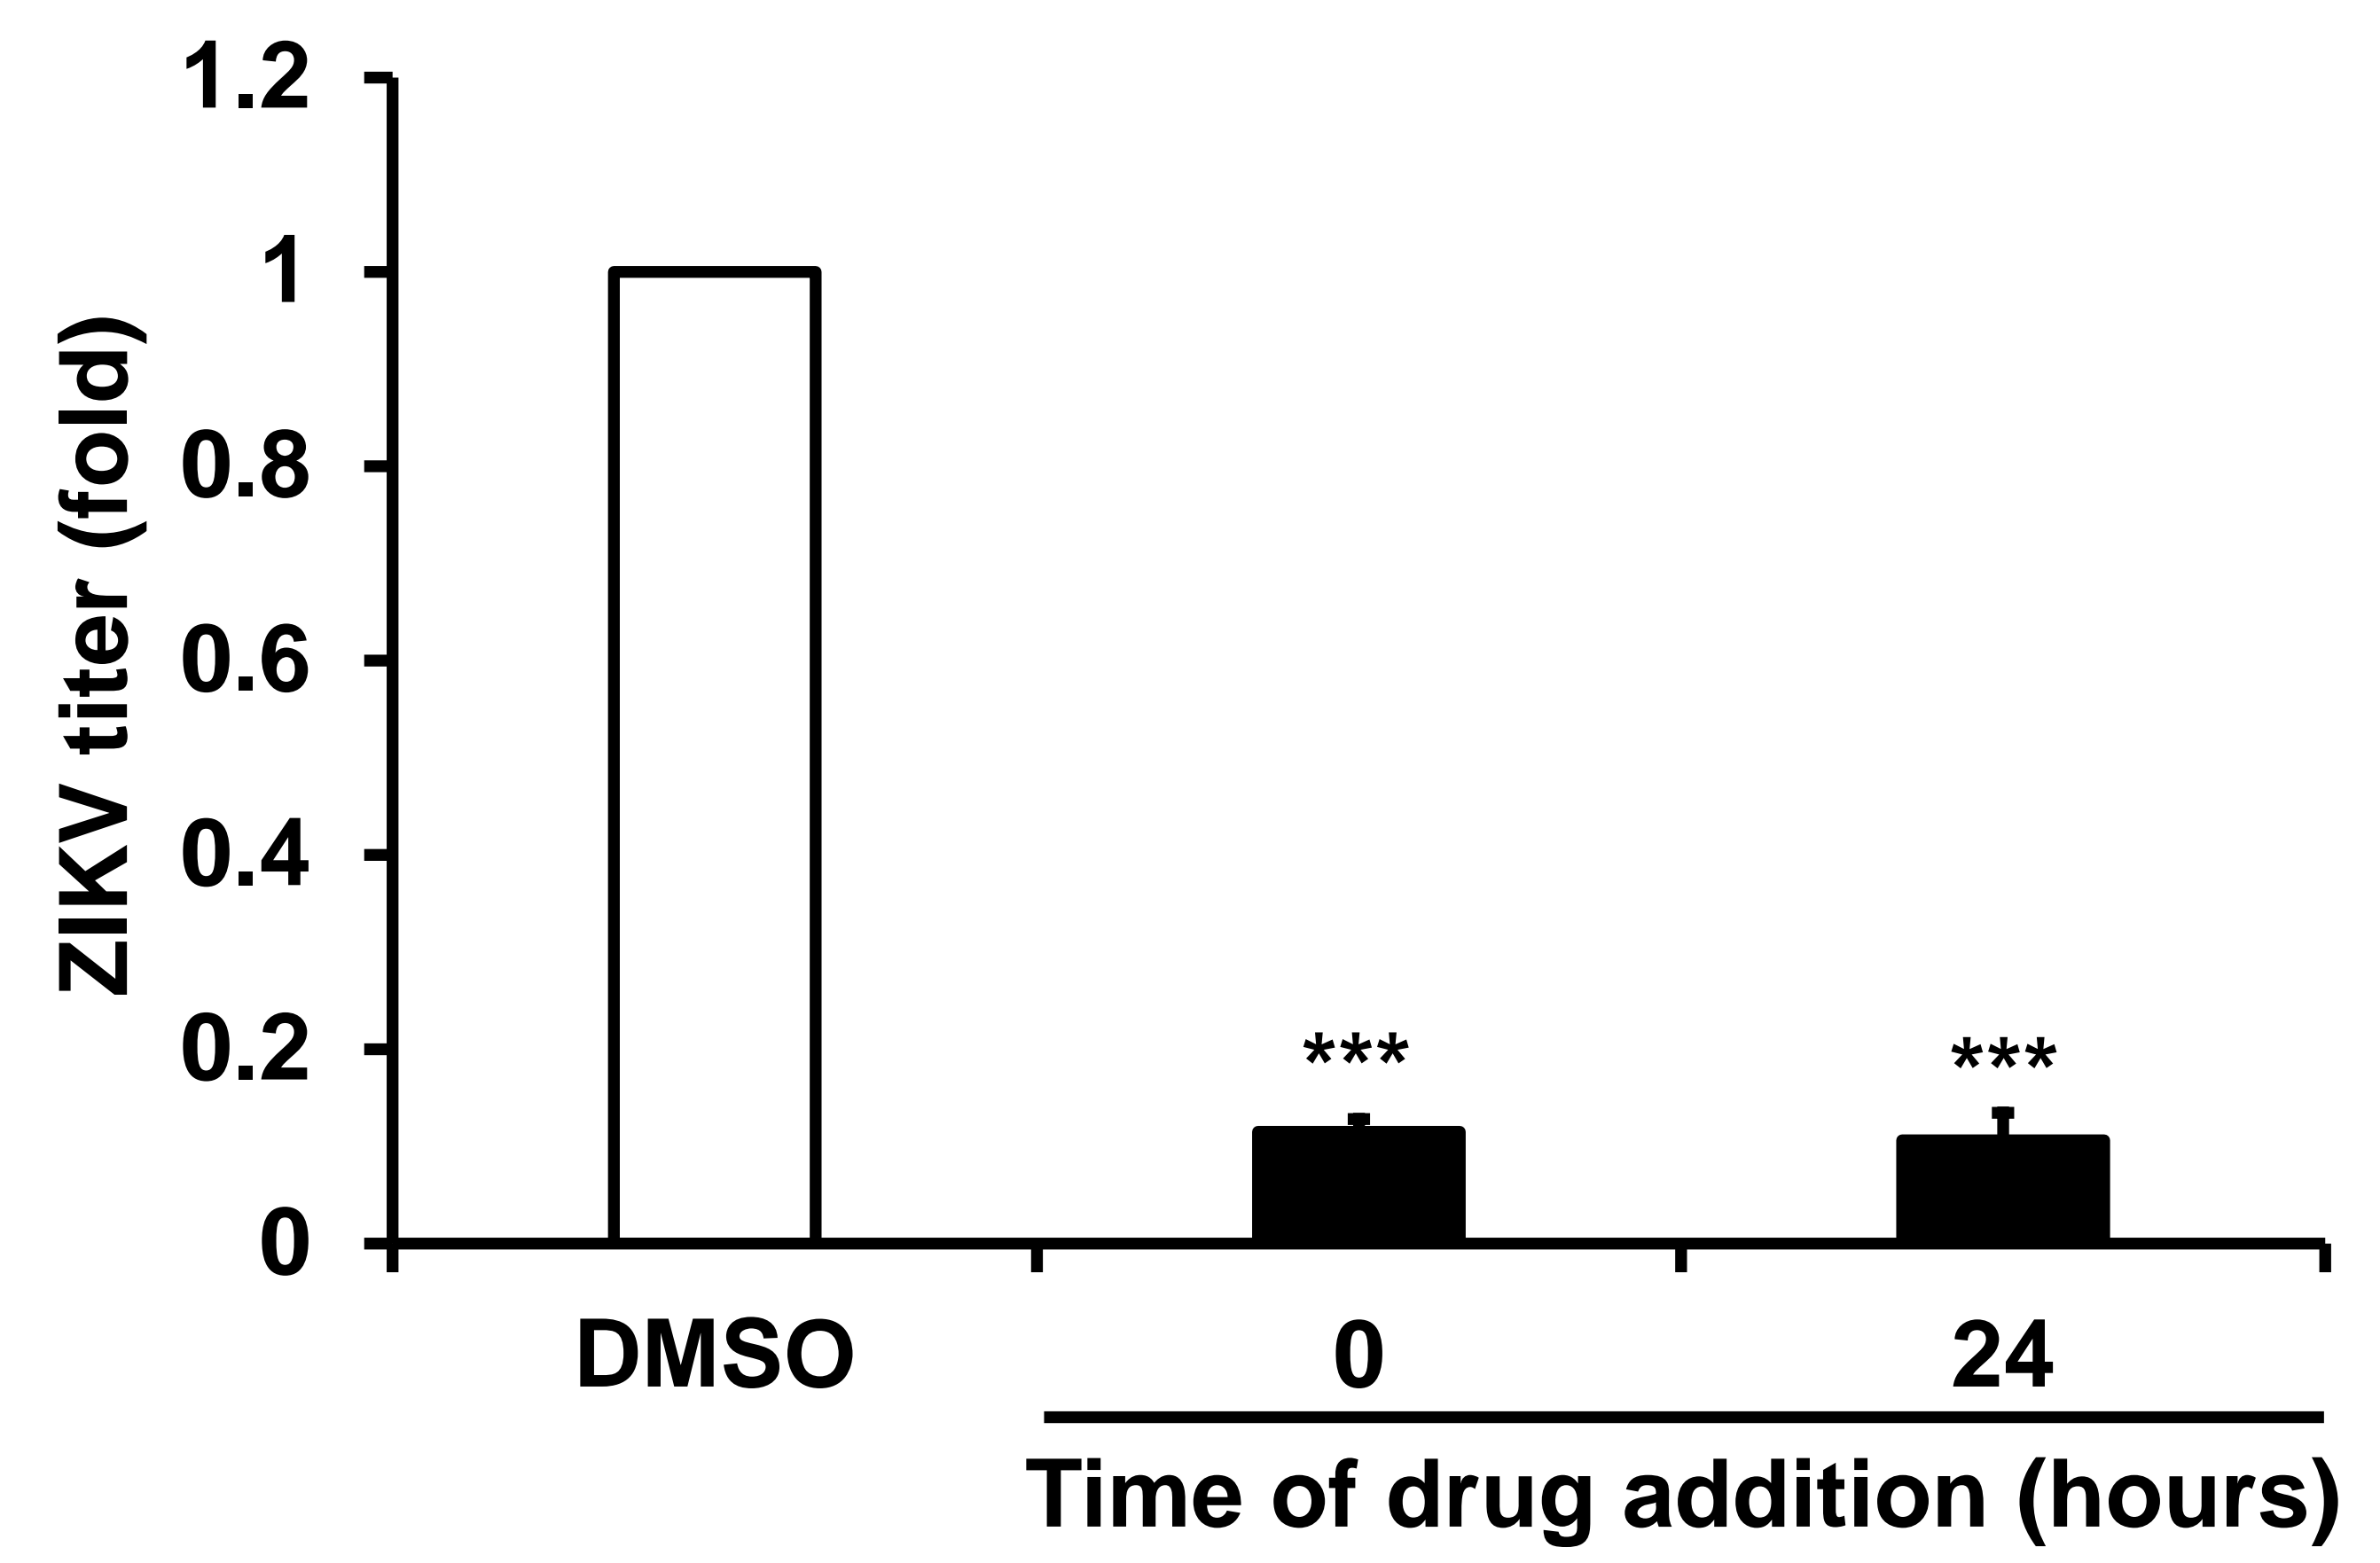

**C**

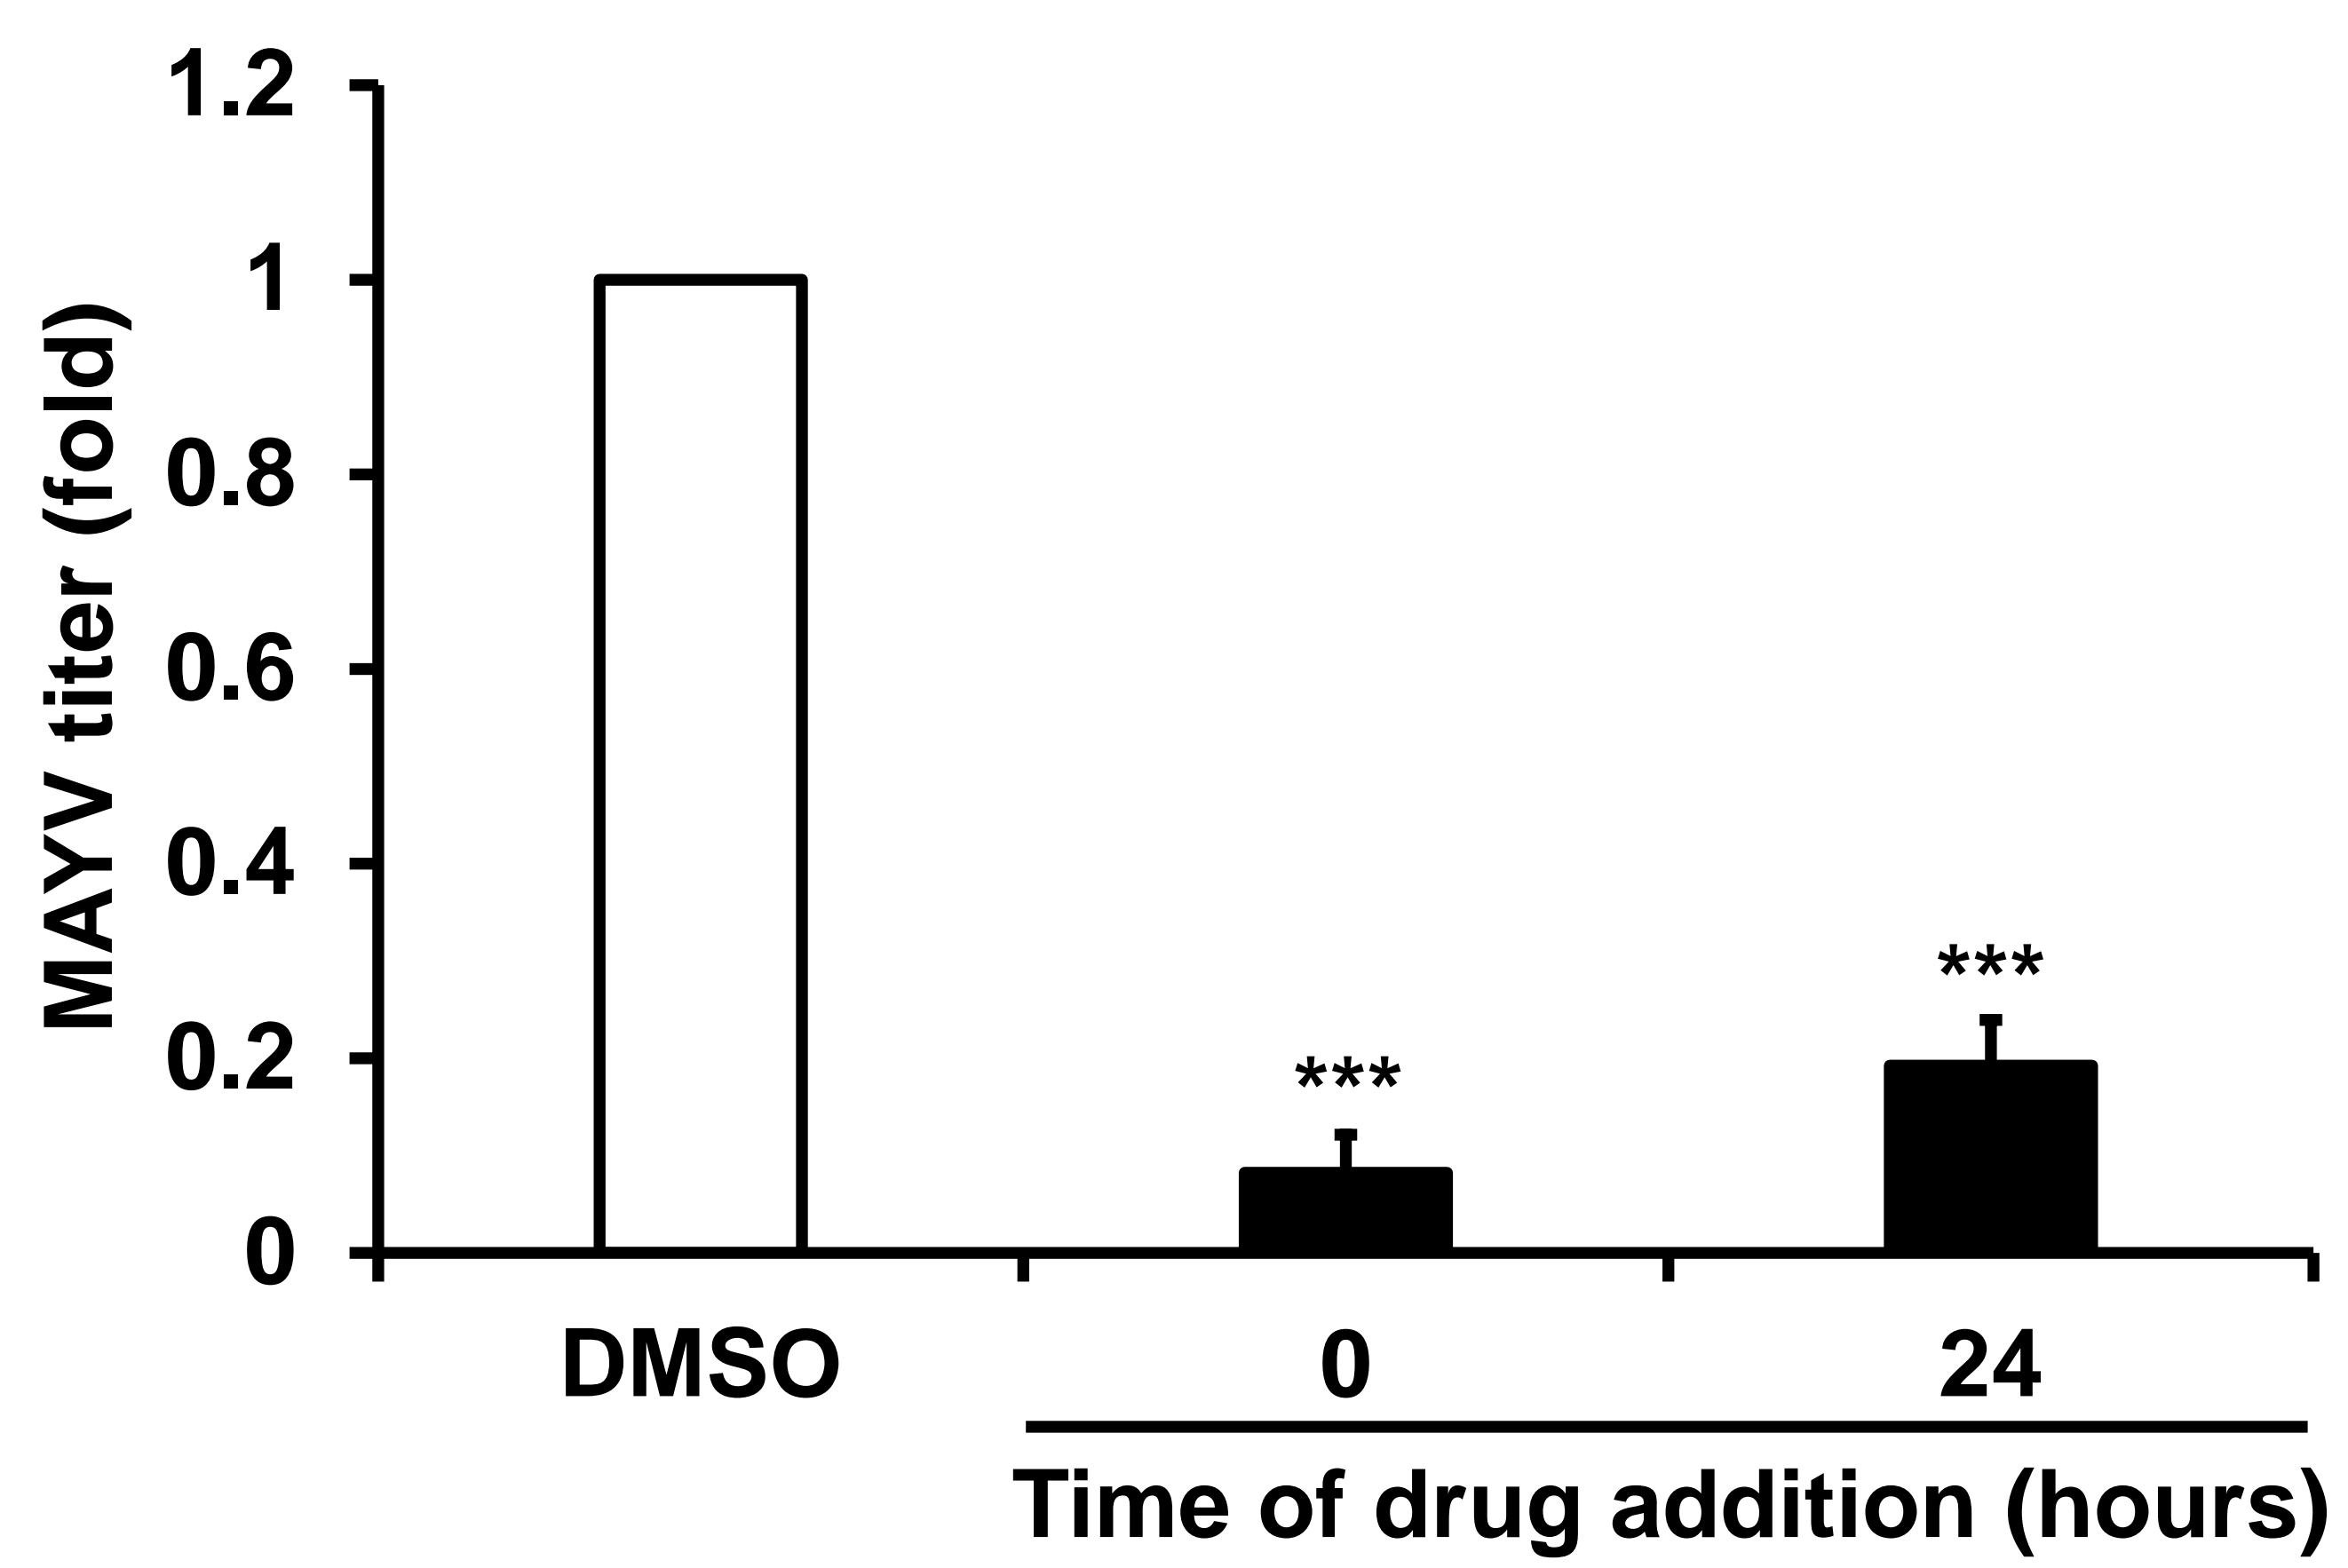

**D**

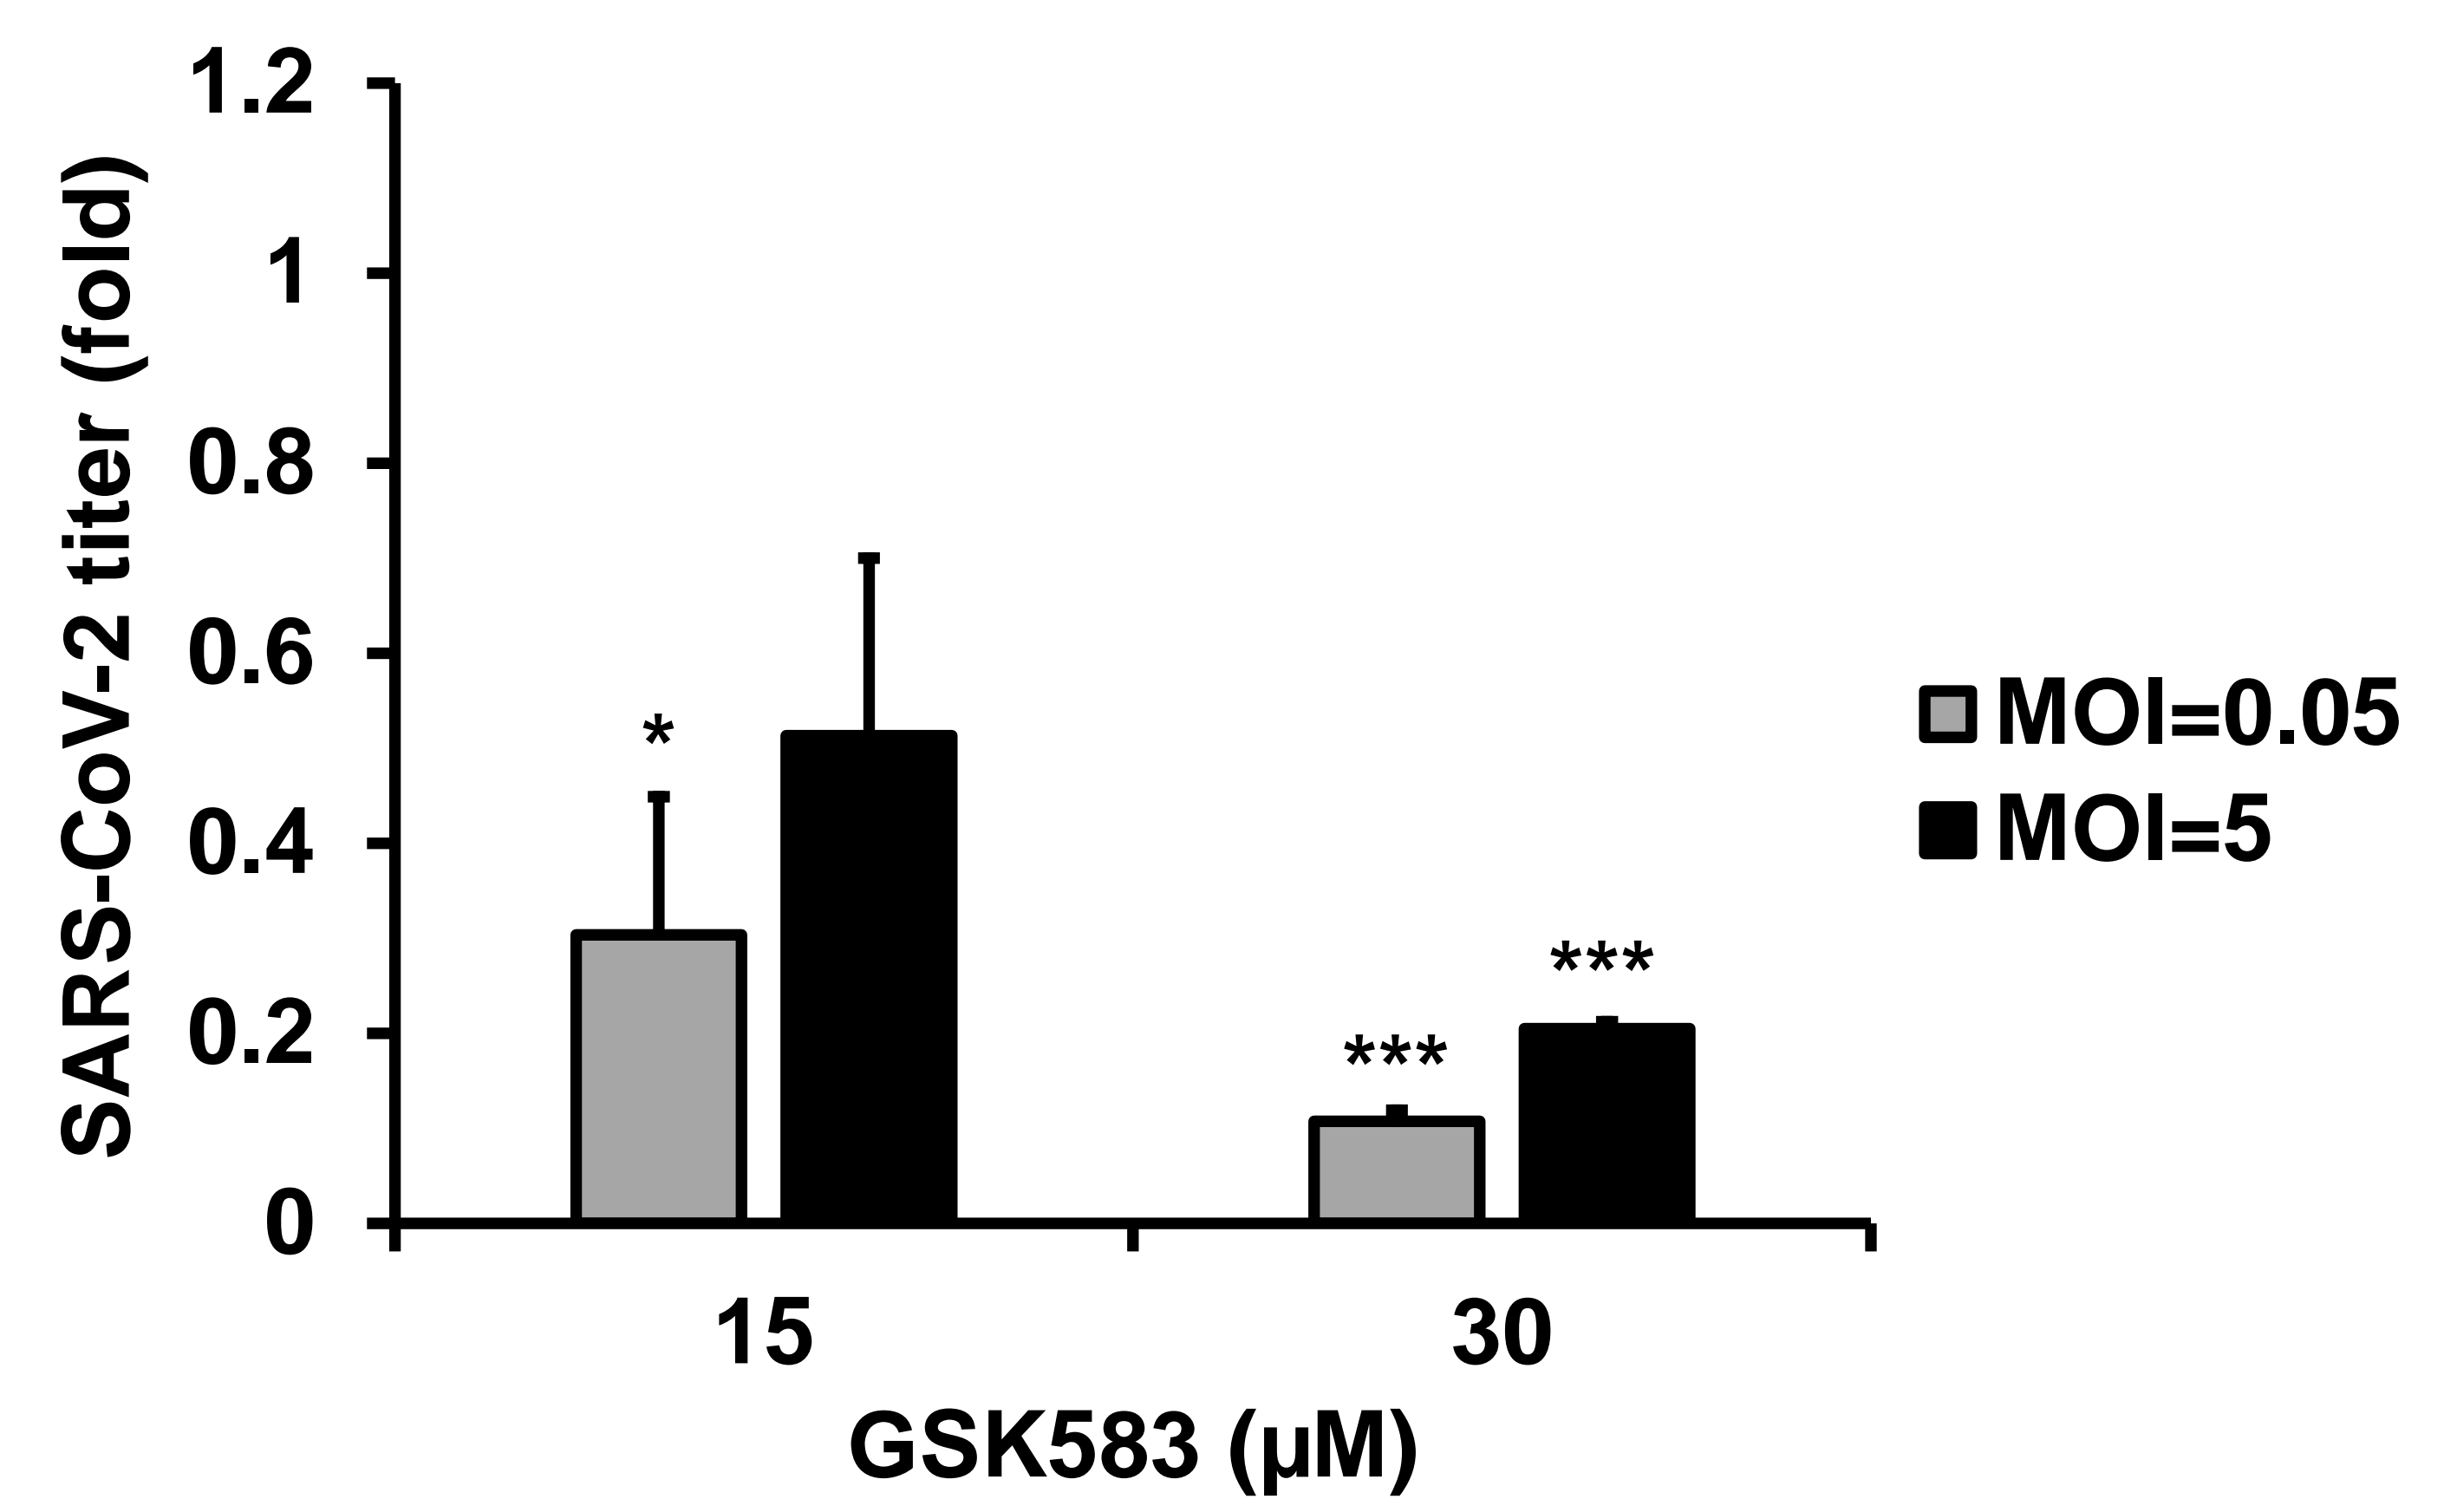

**E**

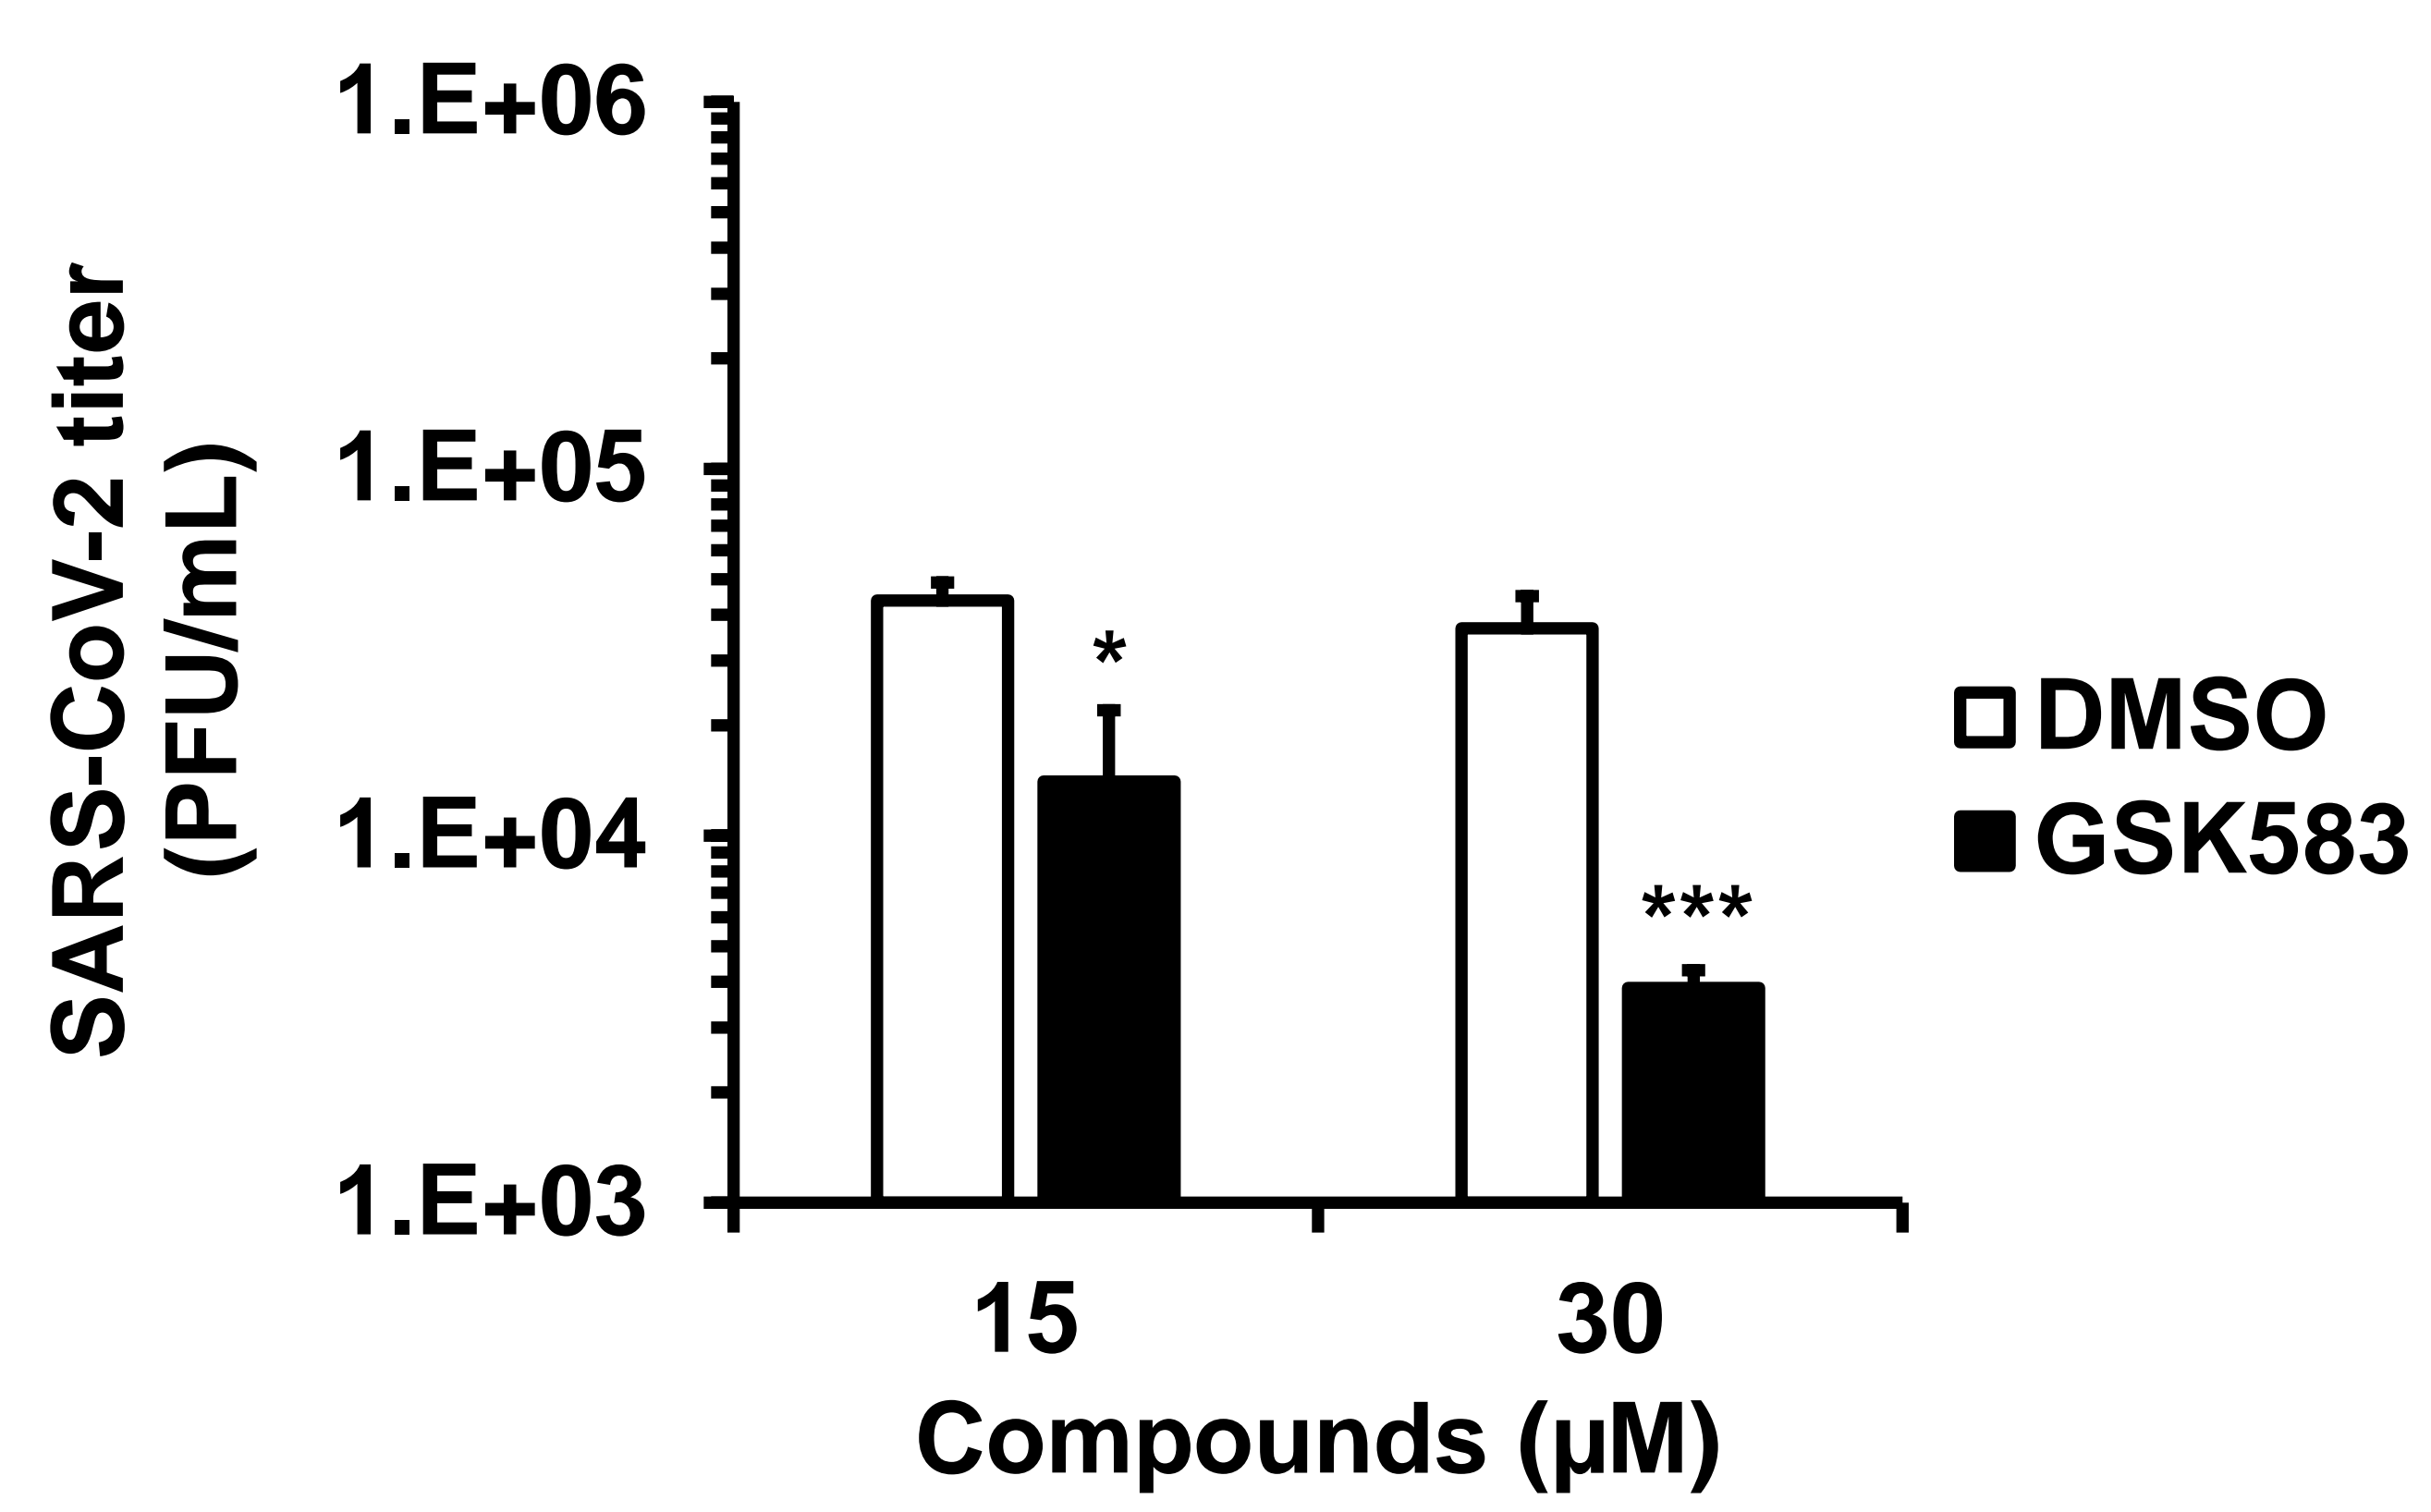

**F**

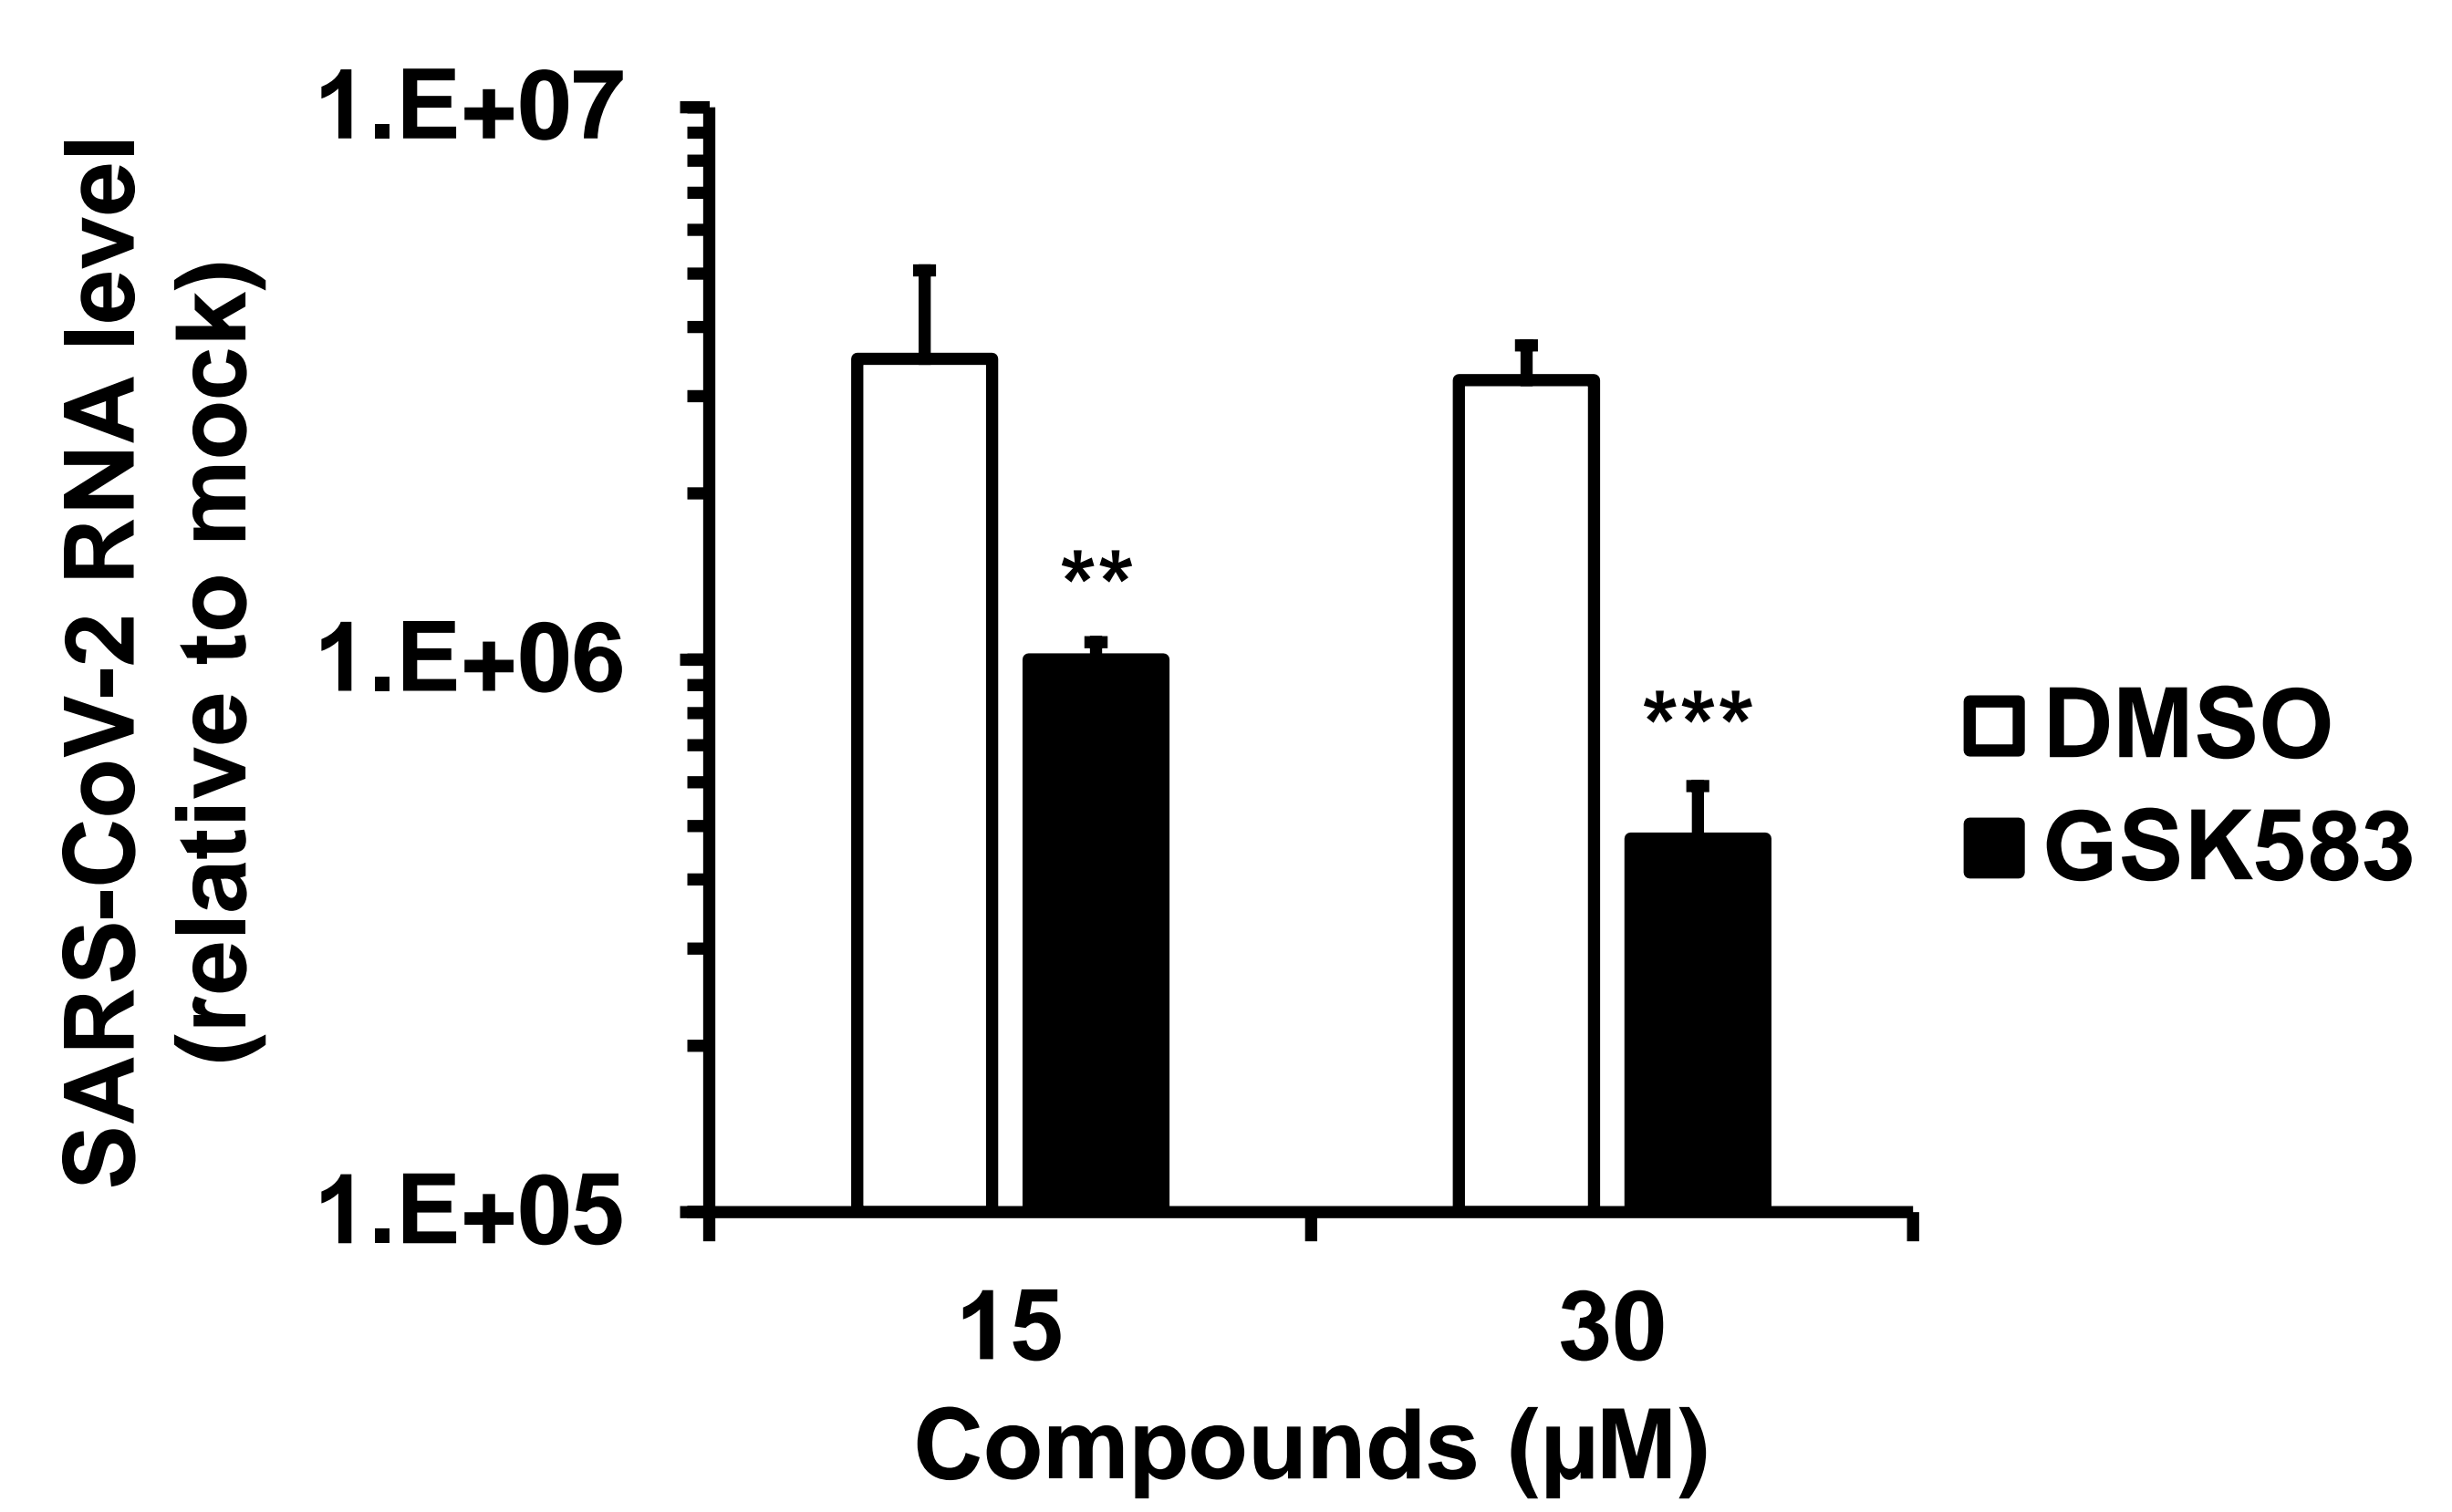

Source: https://www.biorxiv.org/content/10.1101/2020.11.05.370767v2.full.pdf
